# Supplementary material for: Integrative Subtype Discovery in Glioblastoma Using iCluster
Source: PubMed Central journal article supplement (PMC3335101; doi:10.1371/journal.pone.0035236), 2012-04-23

# Supplementary Figure 1

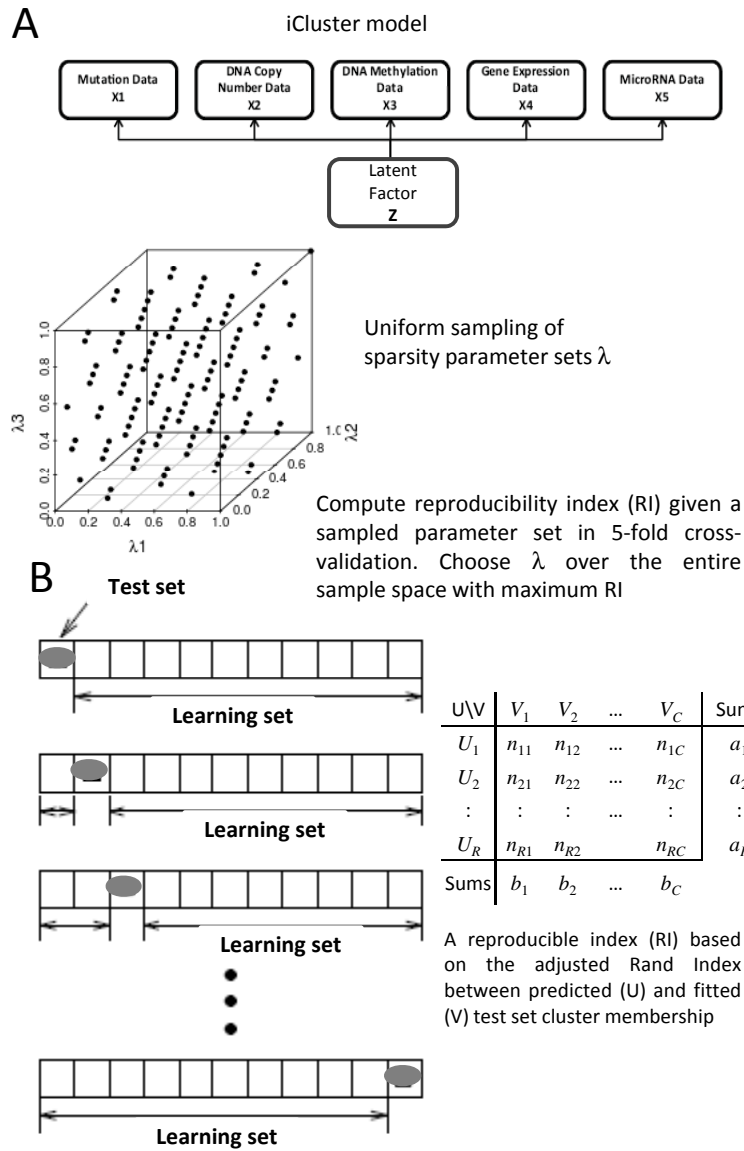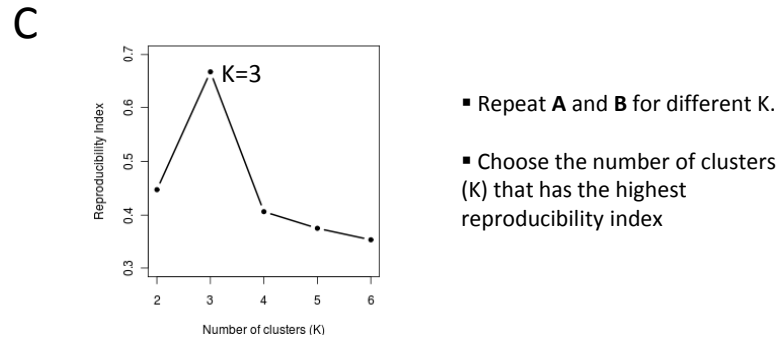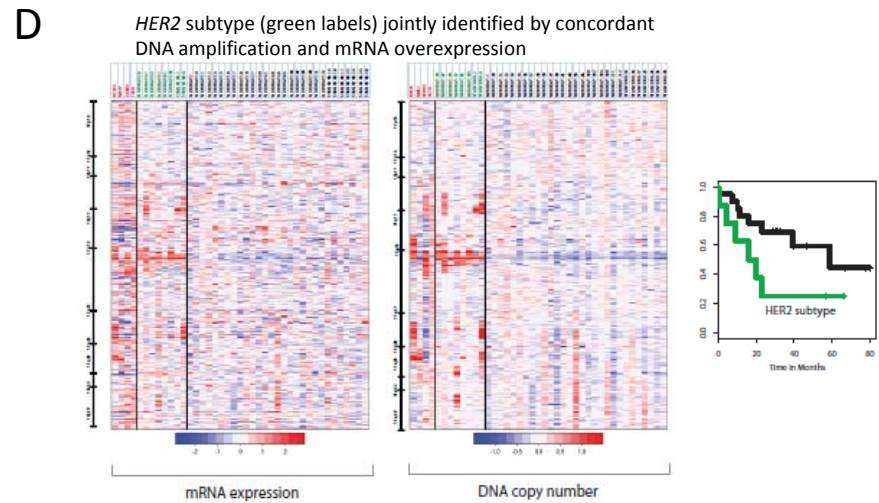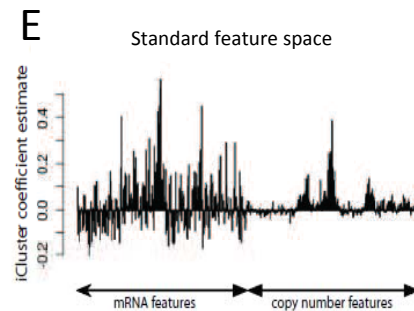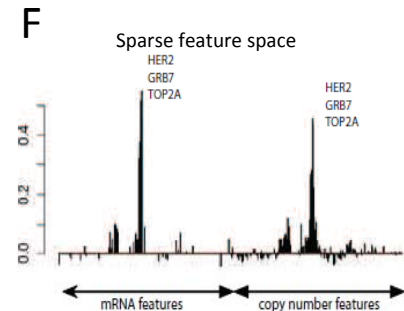

Supplement: pone.0035236.s001.pdf [file pone.0035236.s001.pdf]
