# Supplementary material for: Integrative Subtype Discovery in Glioblastoma Using iCluster
Source: PLoS One. 2012 Apr 23;7(4):e35236. doi: 10.1371/journal.pone.0035236 (PMC3335101; doi:10.1371/journal.pone.0035236)
Supplement: Table S1 — Selected methylation features and functional annotations using DAVID. (XLSX) [file pone.0035236.s005.xlsx]

## Sheet: Methylation features
	Gene Name	Gene Cluster	mean in iCluster 1	mean in iCluster 2	mean in iCluster 3	adj.P.Val
cg04848046	FNDC3B	1	0.769253	0.279233	0.564511	7.29836e-13
cg17243643	RDH5	1	0.72998	0.292682	0.495948	2.94907e-12
cg02506908	HPD	1	0.721811	0.308329	0.545001	6.21367e-11
cg17470143	DCLK1	1	0.69868	0.30258	0.54982	5.83027e-10
cg05668853	RAB34	1	0.689516	0.257139	0.420062	9.81701e-09
cg21663431	SLC44A2	1	0.295275	0.298896	0.570399	9.92542e-08
cg06536578	JPH4	1	0.276189	0.576544	0.694658	1.19597e-07
cg18555555	FABP7	1	0.885762	0.462186	0.793006	1.23148e-07
cg22975712	GALR3	1	0.762803	0.374627	0.694344	1.39355e-07
cg20910746	BBOX1	1	0.714199	0.345681	0.492811	1.78713e-07
cg12354377	ANK3	1	0.235889	0.589817	0.657476	2.13387e-07
cg15538820	OBP2B	1	0.204015	0.28412	0.620787	3.87658e-07
cg21402035	GALR3	1	0.6377	0.357349	0.640095	4.73605e-07
cg02192520	RDH5	1	0.628569	0.217319	0.430311	8.96324e-07
cg14127659	C22orf23	1	0.123305	0.426285	0.526745	1.42352e-06
cg21929875	VSIG2	1	0.779869	0.416406	0.652964	3.44566e-06
cg07918509	ICAM2	1	0.287014	0.362152	0.581218	4.43502e-06
cg00891541	SMPD3	1	0.253331	0.597415	0.411799	7.91682e-06
cg21416237	FKBP10	1	0.72333	0.41054	0.625637	9.78771e-06
cg08615333	TGFB3	1	0.674732	0.321923	0.5277	1.03042e-05
cg12552392	NFS1	1	0.247731	0.396443	0.562775	2.67332e-05
cg20028470	UCN	1	0.733948	0.430881	0.567002	3.01222e-05
cg21457147	KCTD4	1	0.351522	0.496826	0.625727	4.02869e-05
cg21232015	CHFR	1	0.705121	0.488249	0.717783	4.34322e-05
cg15777781	CUGBP2	1	0.25829	0.330767	0.563418	4.34981e-05
cg07005767	ABRA	1	0.668193	0.424678	0.660757	4.49829e-05
cg14832904	GPR75	1	0.318096	0.340046	0.573402	5.26047e-05
cg08594695	AQP4	1	0.824959	0.542764	0.684342	6.2959e-05
cg04527918	UCN	1	0.658708	0.352284	0.624517	6.74694e-05
cg22074467	AKR1C2	1	0.304119	0.297913	0.526714	7.32426e-05
cg05624196	APOD	1	0.275141	0.563887	0.552269	7.81046e-05
cg24389347	C3orf22	1	0.324241	0.270869	0.532733	7.99271e-05
cg21274025	PLA2G3	1	0.683164	0.396021	0.59578	9.19593e-05
cg04439215	KCTD4	1	0.207927	0.268531	0.469445	0.000127725
cg24743310	SLC47A2	1	0.654333	0.351094	0.510208	0.000158017
cg03104936	GRB10	1	0.557455	0.282467	0.463904	0.000180798
cg05064181	ABLIM1	1	0.600463	0.439872	0.688932	0.000180798
cg27087809	ACSBG1	1	0.667654	0.385767	0.572802	0.00027388
cg10071275	MYT1	1	0.246336	0.50648	0.50753	0.000288701
cg08504583	SLAIN1	1	0.241683	0.529627	0.590483	0.000422294
cg02721374	OR1D2	1	0.345896	0.548969	0.668864	0.000447006
cg26757722	CACNG2	1	0.233433	0.406386	0.543595	0.000488253
cg13823701	TNXB	1	0.478497	0.218567	0.45086	0.000541541
cg12435792	PDE6B	1	0.670248	0.362856	0.596401	0.000652265
cg00986320	CYFIP2	1	0.33708	0.581069	0.455691	0.000966877
cg10409560	C4orf26	1	0.80629	0.551091	0.693424	0.00108526
cg08292050	SOCS4	1	0.318938	0.347277	0.578094	0.00117265
cg18204685	BTD	1	0.308273	0.558103	0.618334	0.00126
cg11504740	GPR152	1	0.286851	0.223004	0.451633	0.00126964
cg06690548	SLC7A11	1	0.583503	0.259181	0.457328	0.00162156
cg12445208	ZNF583	1	0.212041	0.262127	0.471877	0.00182447
cg20579480	APOBEC4	1	0.308355	0.351994	0.515592	0.00373833
cg27401095	ZNF324	1	0.280145	0.351517	0.510499	0.00401996
cg21624282	C13orf28	1	0.401394	0.500586	0.648731	0.00615483
cg05985767	ANPEP	1	0.449049	0.601754	0.695246	0.0138174
cg09837803	IL16	1	0.304398	0.439286	0.527572	0.0311353
cg05023691	RGS13	1	0.36024	0.473431	0.715691	0.123314
cg19984039	RGS13	1	0.378833	0.569978	0.596631	0.123314
cg16155588	CUL4A	1	0.3433	0.492078	0.625574	0.123314
cg15984661	CCDC8	2	0.74369	0.314031	0.191961	5.58731e-11
cg13481359	EGR4	2	0.260106	0.706618	0.558769	1.0765e-10
cg18361093	PAOX	2	0.84363	0.516745	0.303834	1.66819e-09
cg26366091	CHI3L2	2	0.695286	0.326277	0.289174	1.16044e-08
cg06154570	HEYL	2	0.810695	0.616497	0.417298	1.52585e-08
cg23352695	EVI2A	2	0.336685	0.696746	0.437037	2.56434e-08
cg20059151	SLC44A3	2	0.714186	0.488708	0.301103	4.93124e-08
cg21402071	CHRNB4	2	0.77254	0.54615	0.333711	8.18047e-08
cg22752533	SLC12A5	2	0.241468	0.678385	0.471483	1.13603e-07
cg09628707	KCNS1	2	0.748899	0.635806	0.458199	1.53223e-07
cg05628549	PRKCDBP	2	0.758906	0.646491	0.388061	1.88075e-07
cg04144788	OXCT2	2	0.693631	0.349805	0.329108	3.44207e-07
cg25483003	ENTPD2	2	0.8195	0.766122	0.474302	4.67305e-07
cg25462291	HEYL	2	0.907709	0.772359	0.509561	5.61456e-07
cg09191232	PAPSS1	2	0.736623	0.617852	0.422918	7.34291e-07
cg18392783	PRKCDBP	2	0.755706	0.628948	0.363543	8.46119e-07
cg04619381	PRR15	2	0.70443	0.425088	0.238128	1.58837e-06
cg04377282	NODAL	2	0.731924	0.442797	0.386892	1.62599e-06
cg07177852	CCDC68	2	0.685305	0.384418	0.293691	2.44133e-06
cg15518950	TMEM171	2	0.89132	0.771939	0.47391	4.72247e-06
cg24693053	MFSD7	2	0.65129	0.359457	0.268654	8.89808e-06
cg26556719	PCDHA13	2	0.747498	0.501309	0.346845	9.19278e-06
cg13614181	C13orf15	2	0.597771	0.596381	0.372744	1.29867e-05
cg07713361	APOL1	2	0.764242	0.46041	0.4424	1.33307e-05
cg13301014	SPINT2	2	0.57798	0.356413	0.231845	1.97798e-05
cg27040030	PDIA2	2	0.595596	0.404736	0.227933	2.22838e-05
cg23090046	KLC1	2	0.664607	0.625935	0.374991	2.59652e-05
cg09009380	PKP1	2	0.86884	0.823916	0.55566	2.87596e-05
cg17031727	COG2	2	0.621506	0.404267	0.208572	3.54991e-05
cg03465320	TAP1	2	0.563376	0.336061	0.475877	3.54991e-05
cg24235037	PLA2R1	2	0.67134	0.653517	0.42334	3.5743e-05
cg08301503	C6orf227	2	0.670519	0.404617	0.317297	3.62289e-05
cg06618866	TLR2	2	0.61354	0.564106	0.303394	3.70338e-05
cg05488632	EPHX3	2	0.78582	0.589586	0.436135	4.34322e-05
cg19779211	KCNQ1	2	0.329253	0.654179	0.388262	4.34981e-05
cg25509184	CFTR	2	0.795376	0.50104	0.437439	4.70664e-05
cg27177839	JAG2	2	0.641618	0.355382	0.210362	4.95179e-05
cg14592099	PCDHB13	2	0.485683	0.410255	0.213917	5.26047e-05
cg04329454	C6orf227	2	0.759077	0.607936	0.433409	5.29358e-05
cg22074858	GBP3	2	0.670347	0.339531	0.291388	5.44378e-05
cg26282384	PCDHGB4	2	0.725472	0.683571	0.43122	5.63914e-05
cg21410991	ISL1	2	0.469762	0.746724	0.476306	6.0704e-05
cg24989962	PTGDR	2	0.343864	0.709255	0.423075	8.92455e-05
cg11757293	KIFC2	2	0.630042	0.408167	0.256772	0.000121281
cg08359956	TMEM176B	2	0.601257	0.36473	0.260253	0.000127177
cg00043004	NOXO1	2	0.728831	0.439777	0.310023	0.000132548
cg03852144	GLRX	2	0.73839	0.515661	0.409052	0.000132693
cg02938601	TNFRSF10C	2	0.587598	0.351135	0.246479	0.000147737
cg09851465	C1orf87	2	0.783235	0.627311	0.459018	0.000148618
cg00564163	STEAP4	2	0.821475	0.55482	0.455125	0.000149857
cg13434842	GATA4	2	0.529233	0.751246	0.492025	0.000154149
cg03473518	GJB6	2	0.73732	0.618735	0.438693	0.00016049
cg01344171	RSPH9	2	0.783946	0.601841	0.504538	0.000209983
cg26420196	GAS6	2	0.823269	0.646795	0.43015	0.000238265
cg10163825	CCDC78	2	0.605718	0.323988	0.285582	0.000238265
cg23960723	ECHDC3	2	0.54416	0.476512	0.257616	0.000241475
cg20322977	CYP26C1	2	0.783202	0.603167	0.535188	0.000241475
cg10045881	CHI3L2	2	0.840384	0.5837	0.499312	0.000272918
cg10414058	HDAC3	2	0.729821	0.581041	0.386595	0.000284746
cg04598121	PENK	2	0.233948	0.622974	0.440935	0.000322421
cg05335315	JAG2	2	0.649692	0.445977	0.265799	0.000350504
cg04444771	C10orf10	2	0.745253	0.577371	0.402219	0.000502312
cg06921282	LRRC56	2	0.430041	0.563725	0.306075	0.000565371
cg23216015	C7orf16	2	0.338965	0.652489	0.585351	0.000621251
cg17940013	GPR157	2	0.646971	0.383151	0.280556	0.000766056
cg20279283	GATA4	2	0.379816	0.725266	0.4648	0.000799422
cg04481779	IL20RA	2	0.719765	0.488769	0.42513	0.000993845
cg06151964	HPN	2	0.773185	0.754925	0.544509	0.000993845
cg20959866	AJAP1	2	0.329813	0.655718	0.336926	0.00115259
cg22631938	GPR27	2	0.76547	0.718065	0.489136	0.00115259
cg19224278	ALDH1A3	2	0.594556	0.378879	0.250343	0.00117265
cg17655614	CDH1	2	0.745818	0.708811	0.496755	0.00130514
cg23095584	GBX2	2	0.406261	0.687946	0.41765	0.00138051
cg04898797	MAP4K2	2	0.57254	0.455821	0.27751	0.00138051
cg18265887	RAC2	2	0.701428	0.645392	0.436646	0.00138051
cg15679651	MAP4K1	2	0.568565	0.826754	0.541306	0.00144723
cg13471990	ENTPD1	2	0.63872	0.485424	0.386091	0.00162156
cg12757143	WDR85	2	0.748578	0.551932	0.473542	0.00241113
cg13599477	NET1	2	0.709492	0.514001	0.374087	0.00241113
cg00418150	ALX4	2	0.739495	0.567493	0.486232	0.00250478
cg21513385	SMAGP	2	0.683743	0.568497	0.411903	0.00252909
cg19904463	FABP5	2	0.712891	0.501481	0.418211	0.00305759
cg01294702	FOXJ1	2	0.529549	0.486988	0.283991	0.00349517
cg21051046	EN2	2	0.436308	0.722124	0.515681	0.00351632
cg19740375	SCN5A	2	0.64179	0.477053	0.347894	0.00358454
cg19005368	PRRG4	2	0.687039	0.57738	0.419525	0.00367673
cg09059945	MEST	2	0.81295	0.59024	0.489368	0.00382071
cg22054164	ECE1	2	0.497437	0.712823	0.473953	0.00487039
cg20073553	NKX3-2	2	0.460358	0.654835	0.368997	0.00524653
cg23539753	SP100	2	0.604331	0.444191	0.329931	0.0054884
cg18881501	MAP2K3	2	0.593487	0.484129	0.316087	0.0054884
cg09872616	MEST	2	0.835884	0.630744	0.53378	0.00595123
cg20264732	ESRP2	2	0.712267	0.563997	0.4544	0.00595123
cg07327468	EYA4	2	0.664551	0.453315	0.40102	0.0078675
cg19868691	WNT10A	2	0.518645	0.576619	0.356519	0.00856468
cg04376312	MYLK	2	0.797899	0.636809	0.55469	0.00894693
cg26511321	HOXA7	2	0.510268	0.678716	0.46738	0.00894693
cg03278643	EVC2	2	0.766892	0.678814	0.555591	0.0103439
cg06336792	CREM	2	0.608752	0.52921	0.357406	0.0111299
cg25072179	APLNR	2	0.62327	0.584801	0.435098	0.0111299
cg00221494	FARP1	2	0.724405	0.624594	0.46777	0.0122273
cg21210789	BAI1	2	0.617501	0.433424	0.360845	0.0122618
cg12770741	NXN	2	0.484419	0.70784	0.540381	0.0137347
cg01520924	HSPA2	2	0.666641	0.526732	0.411944	0.0150927
cg00447208	TMC8	2	0.392274	0.662761	0.466213	0.0178051
cg15096140	MYO1B	2	0.649809	0.761221	0.559085	0.0204078
cg15686608	DAB2IP	2	0.368397	0.618863	0.519351	0.0215731
cg25095814	CASP8	2	0.453488	0.634641	0.495441	0.0311353
cg16957313	DUSP1	2	0.392942	0.543367	0.349546	0.0311353
cg05226008	DLC1	2	0.536809	0.570041	0.412969	0.0311353
cg02727423	EML1	2	0.558169	0.734347	0.591592	0.0311353
cg13053608	GHDC	2	0.547679	0.657253	0.460395	0.0311353
cg04369341	TOX2	2	0.694115	0.579708	0.456206	0.0311353
cg18403361	CLEC14A	2	0.735811	0.673051	0.552165	0.0497809
cg22436411	FCGR2B	2	0.737168	0.644199	0.542054	0.0588043
cg10129493	CD33	2	0.584301	0.747502	0.583475	0.0588043
cg07612655	PTGIS	2	0.716509	0.668407	0.532758	0.0753832
cg11263296	CCDC64	2	0.442828	0.521034	0.362532	0.112264
cg14916288	CCL23	2	0.528521	0.600167	0.432496	0.112264
cg12360736	MBNL1	2	0.398759	0.558584	0.406779	0.123314
cg15433631	IRX2	3	0.10866	0.773241	0.385965	8.10156e-14
cg25764191	INA	3	0.0704385	0.669939	0.259094	4.18416e-12
cg27096144	MSX2	3	0.0686329	0.62033	0.320622	6.27116e-12
cg09254939	KLK10	3	0.0794395	0.607802	0.23229	3.10765e-11
cg11990309	HTR1E	3	0.117432	0.654095	0.428366	5.58731e-11
cg24826867	IRF8	3	0.110103	0.669574	0.366485	7.86306e-10
cg05250458	ZNF177	3	0.141512	0.593419	0.343173	7.64312e-09
cg05839235	NPR3	3	0.194713	0.697757	0.404899	2.1698e-08
cg03611555	SLC25A21	3	0.0273534	0.526263	0.164173	2.31331e-08
cg27634151	GPR83	3	0.0615545	0.458106	0.266004	2.64914e-08
cg17923358	RELN	3	0.140011	0.564308	0.253743	4.33704e-08
cg08303146	KCNQ1	3	0.0990408	0.507751	0.286282	5.4344e-08
cg05158615	NPY	3	0.260947	0.740435	0.439293	5.47049e-08
cg17051321	BNC1	3	0.218877	0.612447	0.274456	8.62905e-08
cg07103493	SLC27A6	3	0.216355	0.674164	0.367717	1.39355e-07
cg11260422	FOXA1	3	0.131559	0.624204	0.320853	2.09126e-07
cg19502744	SRD5A2	3	0.182172	0.580061	0.338057	2.35768e-07
cg02250594	ONECUT2	3	0.319616	0.827889	0.490118	3.04564e-07
cg26796283	MSX2	3	0.163981	0.532213	0.258979	3.05958e-07
cg04172348	SYN2	3	0.071655	0.508055	0.25424	3.09371e-07
cg10238818	CYYR1	3	0.153025	0.667292	0.386626	4.11613e-07
cg26252167	GPR6	3	0.1865	0.671273	0.354013	4.93112e-07
cg26896762	ISL1	3	0.172616	0.568228	0.298757	5.98564e-07
cg11846956	KLK10	3	0.11677	0.566327	0.272281	1.11964e-06
cg27590397	SSTR1	3	0.243648	0.642447	0.335786	1.49573e-06
cg07078114	FAM69B	3	0.297599	0.699617	0.410275	2.44133e-06
cg01851399	PKP2	3	0.25569	0.686117	0.335796	3.03452e-06
cg15982419	RALBP1	3	0.222962	0.667736	0.422602	3.10906e-06
cg20798152	CARTPT	3	0.343339	0.641541	0.360826	4.32157e-06
cg25942450	TLX3	3	0.319572	0.764107	0.527297	5.69119e-06
cg10235817	ADRA2C	3	0.257628	0.666829	0.401485	6.05797e-06
cg08583049	FOXB1	3	0.120708	0.485763	0.208111	7.13713e-06
cg06738602	PTGER2	3	0.223513	0.603152	0.311308	2.05512e-05
cg03980304	IL4R	3	0.208153	0.503315	0.231428	2.10116e-05
cg22836229	EFCAB1	3	0.217008	0.684006	0.356283	2.60534e-05
cg10979891	SMOC1	3	0.202628	0.629321	0.363253	3.5743e-05
cg22670329	CXCL6	3	0.280535	0.605289	0.433315	3.74796e-05
cg07059052	TCEB2	3	0.339056	0.65699	0.36535	4.34322e-05
cg17241310	BARHL2	3	0.212938	0.616576	0.284729	5.42859e-05
cg12946225	HMG20B	3	0.111595	0.45462	0.22973	5.69586e-05
cg11191210	VGLL2	3	0.172763	0.506001	0.236167	8.65637e-05
cg25432696	CXCL6	3	0.223449	0.553095	0.299018	0.000149356
cg23950724	SYT10	3	0.359444	0.681977	0.484442	0.000223261
cg17861230	PDE4C	3	0.388604	0.759381	0.514894	0.000284746
cg13055001	PPP1CA	3	0.376008	0.613934	0.29818	0.000326669
cg11459714	KLK10	3	0.15143	0.46118	0.241804	0.000331001
cg06980053	RASSF1	3	0.410514	0.655148	0.414881	0.000693203
cg04836038	DOCK9	3	0.203175	0.57103	0.313931	0.000735357
cg06821120	RASSF1	3	0.338215	0.622936	0.343704	0.00115259
cg20339650	IGF2	3	0.138123	0.428545	0.281517	0.00115259
cg09936561	DRD5	3	0.284886	0.561961	0.370639	0.00126
cg06493386	TRPA1	3	0.278458	0.620399	0.39238	0.00126
cg06974755	RALGDS	3	0.226712	0.456197	0.253202	0.00138051
cg06092815	SPHKAP	3	0.20349	0.549603	0.323556	0.00142462
cg17183546	D4S234E	3	0.105555	0.391753	0.272679	0.00183766
cg11946503	NEUROG1	3	0.334734	0.649642	0.431312	0.00223305
cg24250393	PRKCB	3	0.139513	0.430021	0.315276	0.00250478
cg04765277	FLJ45983	3	0.341756	0.577616	0.312143	0.00278259
cg06918467	OLIG3	3	0.233642	0.426745	0.203666	0.00328874
cg17192247	MAPRE3	3	0.247881	0.503759	0.333189	0.00631875
cg09191626	SPON1	3	0.387126	0.538761	0.401805	0.112264

## Sheet: DAVID gene cluster 1
Category	Term	Count	%	PValue	Genes	List Total	Pop Hits	Pop Total	Fold Enrichment	Benjamini
INTERPRO	IPR012674:Calycin	3	0.660793	0.00389058	APOD, OBP2B, FABP7	48	33	16659	31.5511	0.235837
GOTERM_CC_ALL	GO:0005886~plasma membrane	21	4.62555	0.00335161	GPR75, ICAM2, TGFB3, AQP4, ANPEP, CACNG2, GPR152, OR1D2, KCTD4, SLC7A11, SLC47A2, RGS13, VSIG2, GRB10, ANK3, GALR3, CYFIP2, ABRA, PLA2G3, DCLK1, SMPD3	48	3777	15908	1.84267	0.347125
INTERPRO	IPR000566:Lipocalin-related protein and Bos/Can/Equ allergen	3	0.660793	0.00366135	APOD, OBP2B, FABP7	48	32	16659	32.5371	0.397214
GOTERM_CC_ALL	GO:0043025~cell soma	4	0.881057	0.0133535	UCN, BTD, TGFB3, FABP7	48	168	15908	7.89087	0.574147
GOTERM_CC_ALL	GO:0031226~intrinsic to plasma membrane	8	1.76211	0.0642845	VSIG2, GPR75, ICAM2, AQP4, ANPEP, KCTD4, OR1D2, DCLK1	48	1215	15908	2.18217	0.700452
GOTERM_CC_ALL	GO:0005783~endoplasmic reticulum	7	1.54185	0.0619914	JPH4, ANK3, FKBP10, FNDC3B, ACSBG1, RDH5, HPD	48	960	15908	2.41658	0.741946
GOTERM_CC_ALL	GO:0044432~endoplasmic reticulum part	4	0.881057	0.0826749	JPH4, FKBP10, RDH5, HPD	48	347	15908	3.82037	0.745869
GOTERM_CC_ALL	GO:0005887~integral to plasma membrane	8	1.76211	0.0582972	VSIG2, GPR75, ICAM2, AQP4, ANPEP, KCTD4, OR1D2, DCLK1	48	1188	15908	2.23176	0.782524
GOTERM_CC_ALL	GO:0044459~plasma membrane part	12	2.64317	0.0527649	VSIG2, ANK3, GPR75, ICAM2, CYFIP2, TGFB3, AQP4, ANPEP, CACNG2, KCTD4, OR1D2, DCLK1	48	2203	15908	1.80527	0.821131
GOTERM_CC_ALL	GO:0005615~extracellular space	6	1.32159	0.0505461	TNXB, APOD, BTD, IL16, TGFB3, PLA2G3	48	685	15908	2.90292	0.888726
GOTERM_BP_ALL	GO:0006810~transport	16	3.52423	0.0164864	JPH4, UCN, SLC44A2, OBP2B, TGFB3, AQP4, CACNG2, KCTD4, SLC7A11, SLC47A2, APOD, RAB34, ABRA, FABP7, DCLK1, SMPD3	47	2629	14116	1.82786	0.949828
GOTERM_BP_ALL	GO:0003008~system process	11	2.42291	0.0208142	ABLIM1, PDE6B, UCN, GALR3, OBP2B, AQP4, CACNG2, FABP7, OR1D2, ACSBG1, RDH5	47	1503	14116	2.1981	0.95163
GOTERM_BP_ALL	GO:0044253~positive regulation of multicellular organismal metabolic process	2	0.440529	0.0415621	UCN, TGFB3	47	13	14116	46.2062	0.952945
GOTERM_BP_ALL	GO:0032967~positive regulation of collagen biosynthetic process	2	0.440529	0.0257806	UCN, TGFB3	47	8	14116	75.0851	0.956468
GOTERM_BP_ALL	GO:0010714~positive regulation of collagen metabolic process	2	0.440529	0.0257806	UCN, TGFB3	47	8	14116	75.0851	0.956468
GOTERM_BP_ALL	GO:0010712~regulation of collagen metabolic process	2	0.440529	0.038426	UCN, TGFB3	47	12	14116	50.0567	0.956487
GOTERM_BP_ALL	GO:0010648~negative regulation of cell communication	4	0.881057	0.0467767	GRB10, TGFB3, SOCS4, RGS13	47	248	14116	4.8442	0.956529
GOTERM_BP_ALL	GO:0032965~regulation of collagen biosynthetic process	2	0.440529	0.0352798	UCN, TGFB3	47	11	14116	54.6074	0.960543
INTERPRO	IPR002345:Lipocalin	2	0.440529	0.0682429	APOD, OBP2B	48	25	16659	27.765	0.961281
GOTERM_BP_ALL	GO:0044246~regulation of multicellular organismal metabolic process	2	0.440529	0.054007	UCN, TGFB3	47	17	14116	35.3342	0.96425
GOTERM_BP_ALL	GO:0007399~nervous system development	8	1.76211	0.0607184	UCN, BTD, ANK3, AQP4, FABP7, MYT1, DCLK1, ACSBG1	47	1088	14116	2.20839	0.968861
GOTERM_BP_ALL	GO:0032501~multicellular organismal process	20	4.40529	0.0743797	ABLIM1, UCN, TNXB, BTD, OBP2B, TGFB3, AQP4, ANPEP, CACNG2, MYT1, OR1D2, ACSBG1, RDH5, PDE6B, AKR1C2, ANK3, GALR3, FABP7, DCLK1, SMPD3	47	4280	14116	1.40346	0.969134
GOTERM_BP_ALL	GO:0050877~neurological system process	10	2.20264	0.014751	ABLIM1, PDE6B, UCN, GALR3, OBP2B, CACNG2, FABP7, OR1D2, ACSBG1, RDH5	47	1210	14116	2.48215	0.971749
GOTERM_BP_ALL	GO:0050890~cognition	7	1.54185	0.0731265	ABLIM1, PDE6B, UCN, GALR3, OBP2B, OR1D2, RDH5	47	909	14116	2.31285	0.973879
GOTERM_BP_ALL	GO:0009968~negative regulation of signal transduction	4	0.881057	0.0351035	GRB10, TGFB3, SOCS4, RGS13	47	221	14116	5.43603	0.974664
GOTERM_MF_ALL	GO:0005215~transporter activity	9	1.98238	0.0185186	SLC44A2, APOD, OBP2B, AQP4, CACNG2, FABP7, KCTD4, SLC7A11, SLC47A2	45	1175	15143	2.57753	0.976209
GOTERM_BP_ALL	GO:0051179~localization	18	3.96476	0.0103647	JPH4, UCN, SLC44A2, IL16, OBP2B, TGFB3, AQP4, CACNG2, KCTD4, SLC7A11, SLC47A2, APOD, ANK3, RAB34, ABRA, FABP7, DCLK1, SMPD3	47	2993	14116	1.80626	0.976501
GOTERM_BP_ALL	GO:0006725~cellular aromatic compound metabolic process	3	0.660793	0.0724562	NFS1, ANPEP, HPD	47	136	14116	6.62516	0.979104
GOTERM_BP_ALL	GO:0045740~positive regulation of DNA replication	2	0.440529	0.087421	UCN, TGFB3	47	28	14116	21.4529	0.979235
GOTERM_BP_ALL	GO:0043062~extracellular structure organization	3	0.660793	0.0986956	TNXB, ANK3, CACNG2	47	163	14116	5.52774	0.984338
GOTERM_MF_ALL	GO:0005102~receptor binding	7	1.54185	0.0417246	GRB10, UCN, TNXB, IL16, ICAM2, TGFB3, CACNG2	45	886	15143	2.65867	0.985906
GOTERM_BP_ALL	GO:0051234~establishment of localization	17	3.74449	0.00761048	JPH4, UCN, SLC44A2, OBP2B, TGFB3, AQP4, CACNG2, KCTD4, SLC7A11, SLC47A2, APOD, ANK3, RAB34, ABRA, FABP7, DCLK1, SMPD3	47	2656	14116	1.92236	0.995915

## Sheet: DAVID gene cluster 2
Category	Term	Count	%	PValue	Genes	List Total	Pop Hits	Pop Total	Fold Enrichment	Benjamini
GOTERM_BP_ALL	GO:0048598~embryonic morphogenesis	13	1.35558	4.23745e-07	DLC1, NODAL, JAG2, GJB6, MBNL1, ECE1, ALDH1A3, GATA4, HOXA7, CASP8, NKX3-2, GBX2, ALX4	89	307	14116	6.71625	0.000496929
GOTERM_BP_ALL	GO:0032502~developmental process	39	4.06674	9.7129e-06	DLC1, STEAP4, PRR15, CREM, JAG2, CDH1, PCDHB13, ECE1, HSPA2, ALDH1A3, BAI1, HOXA7, CASP8, GATA4, NKX3-2, GBX2, PAPSS1, PCDHA13, ALX4, MEST, WNT10A, FOXJ1, NODAL, CFTR, MBNL1, EN2, GJB6, ISL1, GAS6, EYA4, HDAC3, PKP1, NXN, CYP26C1, C7ORF16, PTGDR, HEYL, TMEM176B, FABP5	89	3148	14116	1.96495	0.00284427
GOTERM_BP_ALL	GO:0032501~multicellular organismal process	48	5.00521	5.07813e-06	DLC1, PRR15, CREM, JAG2, CDH1, PCDHB13, APLNR, ECE1, RAC2, HSPA2, ALDH1A3, BAI1, GATA4, CASP8, HOXA7, NKX3-2, GBX2, ENTPD1, PAPSS1, PCDHA13, ALX4, ENTPD2, KCNQ1, SCN5A, MEST, WNT10A, FOXJ1, NODAL, MAP2K3, SLC12A5, CFTR, MBNL1, GJB6, EN2, ISL1, GAS6, EYA4, HDAC3, PKP1, NXN, PENK, CYP26C1, C7ORF16, HEYL, PTGDR, CHRNB4, TMEM176B, FABP5	89	4280	14116	1.77877	0.0029739
GOTERM_BP_ALL	GO:0007275~multicellular organismal development	37	3.85819	7.77664e-06	DLC1, PRR15, CREM, JAG2, CDH1, PCDHB13, ECE1, ALDH1A3, BAI1, HOXA7, CASP8, GATA4, NKX3-2, GBX2, PAPSS1, PCDHA13, ALX4, MEST, WNT10A, FOXJ1, NODAL, CFTR, MBNL1, EN2, GJB6, ISL1, GAS6, EYA4, HDAC3, PKP1, NXN, CYP26C1, C7ORF16, PTGDR, HEYL, TMEM176B, FABP5	89	2865	14116	2.04832	0.00303606
GOTERM_BP_ALL	GO:0048562~embryonic organ morphogenesis	8	0.834202	1.89388e-05	ALDH1A3, NODAL, GATA4, HOXA7, NKX3-2, GBX2, GJB6, ALX4	89	133	14116	9.54026	0.00443323
GOTERM_BP_ALL	GO:0009790~embryonic development	14	1.45985	4.74744e-05	DLC1, NODAL, JAG2, CDH1, GJB6, MBNL1, ECE1, ALDH1A3, GATA4, HOXA7, CASP8, NKX3-2, GBX2, ALX4	89	568	14116	3.90932	0.00555341
GOTERM_BP_ALL	GO:0009887~organ morphogenesis	14	1.45985	4.41466e-05	DLC1, NODAL, JAG2, GJB6, ISL1, GAS6, ALDH1A3, GATA4, HOXA7, CASP8, NKX3-2, GBX2, ALX4, TMEM176B	89	564	14116	3.93705	0.00573738
GOTERM_BP_ALL	GO:0009792~embryonic development ending in birth or egg hatching	11	1.14703	4.22608e-05	DLC1, ECE1, NODAL, GATA4, HOXA7, CASP8, NKX3-2, GBX2, CDH1, MBNL1, ALX4	89	334	14116	5.22358	0.00617746
GOTERM_BP_ALL	GO:0043009~chordate embryonic development	11	1.14703	3.91573e-05	DLC1, ECE1, NODAL, GATA4, HOXA7, CASP8, NKX3-2, GBX2, CDH1, MBNL1, ALX4	89	331	14116	5.27092	0.00654029
GOTERM_BP_ALL	GO:0009653~anatomical structure morphogenesis	21	2.18978	3.62311e-05	DLC1, FOXJ1, NODAL, JAG2, CDH1, MBNL1, GJB6, ISL1, GAS6, EYA4, HDAC3, ECE1, ALDH1A3, GATA4, BAI1, CASP8, HOXA7, GBX2, NKX3-2, ALX4, TMEM176B	89	1197	14116	2.78257	0.00705828
GOTERM_BP_ALL	GO:0048568~embryonic organ development	8	0.834202	9.77468e-05	ALDH1A3, NODAL, GATA4, HOXA7, NKX3-2, GBX2, GJB6, ALX4	89	172	14116	7.37706	0.0103697
GOTERM_BP_ALL	GO:0048731~system development	30	3.12826	0.000112781	DLC1, JAG2, CDH1, PCDHB13, ECE1, ALDH1A3, CASP8, HOXA7, GATA4, BAI1, GBX2, NKX3-2, PCDHA13, PAPSS1, ALX4, MEST, FOXJ1, NODAL, CFTR, EN2, GJB6, MBNL1, ISL1, GAS6, HDAC3, CYP26C1, HEYL, C7ORF16, TMEM176B, FABP5	89	2330	14116	2.04215	0.0109644
GOTERM_BP_ALL	GO:0048856~anatomical structure development	31	3.23253	0.000194825	DLC1, JAG2, CDH1, PCDHB13, ECE1, ALDH1A3, CASP8, HOXA7, GATA4, BAI1, GBX2, NKX3-2, PCDHA13, PAPSS1, ALX4, MEST, FOXJ1, NODAL, CFTR, MBNL1, EN2, GJB6, ISL1, GAS6, EYA4, HDAC3, CYP26C1, HEYL, C7ORF16, TMEM176B, FABP5	89	2527	14116	1.94571	0.0174272
SP_PIR_KEYWORDS	polymorphism	87	9.07195	0.000133596	KIFC2, DLC1, STEAP4, PRR15, SLC44A3, PDIA2, TLR2, JAG2, ECHDC3, PTGIS, TMEM171, LRRC56, SPINT2, CASP8, ALX4, KCNQ1, NET1, WNT10A, DAB2IP, SP100, NODAL, CFTR, PRKCDBP, AJAP1, FARP1, RSPH9, TOX2, EVC2, EYA4, WDR85, TNFRSF10C, EML1, IL20RA, CD33, PTGDR, C1ORF87, ESRP2, GBP3, CCDC8, MFSD7, C10ORF10, CREM, MAP4K1, PCDHB13, C6ORF227, CDH1, APLNR, KCNS1, ECE1, CCL23, PRRG4, RAC2, HSPA2, ALDH1A3, HOXA7, …	113	11550	19235	1.28219	0.0279268
SP_PIR_KEYWORDS	ectodermal dysplasia	4	0.417101	0.000355779	WNT10A, EVC2, PKP1, GJB6	113	24	19235	28.3702	0.0370168
GOTERM_BP_ALL	GO:0016331~morphogenesis of embryonic epithelium	5	0.521376	0.000462794	DLC1, ALDH1A3, NODAL, CASP8, JAG2	89	58	14116	13.673	0.038042
GOTERM_BP_ALL	GO:0048513~organ development	23	2.39833	0.00079458	DLC1, NODAL, JAG2, CDH1, CFTR, MBNL1, GJB6, EN2, ISL1, GAS6, HDAC3, ECE1, CYP26C1, ALDH1A3, HOXA7, GATA4, CASP8, GBX2, NKX3-2, ALX4, TMEM176B, FABP5, MEST	89	1738	14116	2.09894	0.0602683
SP_PIR_KEYWORDS	glycoprotein	41	4.27529	0.000942306	STEAP4, SLC44A3, PDIA2, JAG2, TLR2, CDH1, PCDHB13, APLNR, ECE1, SPINT2, EVI2A, GPR27, BAI1, SMAGP, PLA2R1, ENTPD1, PCDHA13, KCNQ1, SCN5A, ENTPD2, MEST, WNT10A, HPN, TMC8, NODAL, EPHX3, SLC12A5, CHI3L2, CFTR, GAS6, PCDHGB4, EVC2, TNFRSF10C, APOL1, FCGR2B, IL20RA, CD33, PTGDR, CHRNB4, GHDC, CLEC14A	113	4318	19235	1.61627	0.0644503
GOTERM_BP_ALL	GO:0007389~pattern specification process	8	0.834202	0.0013794	CYP26C1, FOXJ1, NODAL, GATA4, HOXA7, NKX3-2, GBX2, ALX4	89	267	14116	4.75226	0.086026
GOTERM_BP_ALL	GO:0065007~biological regulation	62	6.46507	0.00132102	DLC1, PDIA2, C13ORF15, JAG2, TLR2, PTGIS, GATA4, CASP8, ALX4, KCNQ1, NET1, DAB2IP, SP100, NOXO1, EGR4, FOXJ1, NODAL, CFTR, MBNL1, TOX2, FARP1, EYA4, TNFRSF10C, CD33, PTGDR, ESRP2, CREM, MAP4K2, MAP4K1, CDH1, APLNR, CCL23, ECE1, RAC2, GPR27, ALDH1A3, BAI1, HOXA7, NKX3-2, GBX2, ENTPD1, ENTPD2, SCN5A, GLRX, HPN, GPR157, MAP2K3, SLC12A5, EN2, GJB6, ISL1, GAS6, HDAC3, PKP1, PENK, NXN, DUSP1, CYP26C1, …	89	7484	14116	1.31395	0.0871745
GOTERM_BP_ALL	GO:0007417~central nervous system development	10	1.04275	0.00130358	DLC1, CYP26C1, ALDH1A3, NODAL, C7ORF16, JAG2, GBX2, CDH1, EN2, ISL1	89	425	14116	3.73192	0.0912007
SP_PIR_KEYWORDS	transmembrane	44	4.58811	0.00233816	MFSD7, STEAP4, SLC44A3, JAG2, TLR2, CDH1, PCDHB13, APLNR, KCNS1, PRRG4, ECE1, PTGIS, TMEM171, SPINT2, EVI2A, GPR27, BAI1, TAP1, SMAGP, PLA2R1, ENTPD1, PCDHA13, KCNQ1, SCN5A, ENTPD2, MEST, HPN, TMC8, GPR157, SLC12A5, CFTR, AJAP1, GJB6, PCDHGB4, EVC2, CYP26C1, FCGR2B, IL20RA, CD33, PTGDR, CHRNB4, GBP3, CLEC14A, TMEM176B	113	4973	19235	1.50608	0.0944876
SP_PIR_KEYWORDS	developmental protein	13	1.35558	0.00193854	WNT10A, PRR15, NODAL, CREM, JAG2, EN2, ISL1, EYA4, NXN, PKP1, HEYL, HOXA7, ALX4	113	779	19235	2.84066	0.0977306
GOTERM_BP_ALL	GO:0009952~anterior/posterior pattern formation	6	0.625652	0.00180995	CYP26C1, NODAL, GATA4, HOXA7, GBX2, ALX4	89	140	14116	6.79743	0.105814
GOTERM_BP_ALL	GO:0007420~brain development	8	0.834202	0.00216432	DLC1, ALDH1A3, NODAL, JAG2, GBX2, CDH1, EN2, ISL1	89	289	14116	4.3905	0.119332
GOTERM_BP_ALL	GO:0043583~ear development	5	0.521376	0.00291599	ECE1, NKX3-2, JAG2, GBX2, GJB6	89	95	14116	8.34772	0.144186
GOTERM_BP_ALL	GO:0007399~nervous system development	16	1.6684	0.00279811	DLC1, NODAL, JAG2, CDH1, PCDHB13, EN2, MBNL1, ISL1, CYP26C1, ALDH1A3, HEYL, BAI1, C7ORF16, CASP8, GBX2, PCDHA13	89	1088	14116	2.33245	0.14488
GOTERM_BP_ALL	GO:0002009~morphogenesis of an epithelium	5	0.521376	0.00363568	DLC1, ALDH1A3, NODAL, CASP8, JAG2	89	101	14116	7.85182	0.169525
UP_SEQ_FEATURE	sequence variant	88	9.17623	0.000503935	KIFC2, DLC1, STEAP4, PRR15, SLC44A3, PDIA2, TLR2, JAG2, ECHDC3, PTGIS, TMEM171, LRRC56, SPINT2, CASP8, GATA4, ALX4, KCNQ1, NET1, WNT10A, DAB2IP, SP100, NODAL, CFTR, PRKCDBP, AJAP1, FARP1, RSPH9, TOX2, EVC2, EYA4, WDR85, TNFRSF10C, EML1, IL20RA, CD33, PTGDR, C1ORF87, ESRP2, GBP3, CCDC8, MFSD7, C10ORF10, CREM, MAP4K1, PCDHB13, CDH1, C6ORF227, APLNR, KCNS1, ECE1, CCL23, PRRG4, RAC2, HSPA2, ALDH1A3, …	113	11992	19113	1.2412	0.198914
GOTERM_CC_ALL	GO:0031226~intrinsic to plasma membrane	16	1.6684	0.00726514	HPN, NOXO1, TLR2, JAG2, APLNR, KCNS1, TNFRSF10C, CD33, TAP1, BAI1, CHRNB4, PCDHA13, ENTPD1, PLA2R1, SCN5A, KCNQ1	99	1215	15908	2.11604	0.211951
GOTERM_BP_ALL	GO:0050794~regulation of cellular process	56	5.83942	0.0050468	DLC1, PDIA2, C13ORF15, JAG2, TLR2, PTGIS, GATA4, CASP8, ALX4, KCNQ1, NET1, DAB2IP, SP100, NOXO1, EGR4, FOXJ1, NODAL, MBNL1, TOX2, FARP1, EYA4, TNFRSF10C, CD33, PTGDR, ESRP2, CREM, MAP4K2, MAP4K1, CDH1, APLNR, CCL23, ECE1, RAC2, GPR27, ALDH1A3, BAI1, HOXA7, NKX3-2, GBX2, GLRX, GPR157, MAP2K3, EN2, GJB6, ISL1, GAS6, HDAC3, PKP1, PENK, NXN, DUSP1, CYP26C1, FCGR2B, C7ORF16, HEYL, CHRNB4	89	6819	14116	1.30253	0.219083
GOTERM_BP_ALL	GO:0042221~response to chemical stimulus	17	1.77268	0.00531352	SP100, PDIA2, TLR2, JAG2, CDH1, CFTR, HDAC3, ECE1, CCL23, HSPA2, DUSP1, RAC2, ALDH1A3, CASP8, CHRNB4, KCNQ1, MEST	89	1281	14116	2.10485	0.22118
GOTERM_CC_ALL	GO:0005886~plasma membrane	37	3.85819	0.00261073	DLC1, STEAP4, MAP4K2, JAG2, TLR2, CDH1, PCDHB13, APLNR, KCNS1, ECE1, SPINT2, GPR27, BAI1, CASP8, TAP1, SMAGP, PLA2R1, ENTPD1, PCDHA13, KCNQ1, SCN5A, HPN, GPR157, NOXO1, SLC12A5, CFTR, GJB6, AJAP1, PCDHGB4, TNFRSF10C, PKP1, FCGR2B, CD33, PTGDR, CHRNB4, COG2, CCDC8	99	3777	15908	1.57411	0.226002
SP_PIR_KEYWORDS	cell membrane	23	2.39833	0.00745763	STEAP4, GPR157, NOXO1, MAP4K2, CDH1, PCDHB13, GJB6, AJAP1, PCDHGB4, APLNR, KCNS1, TNFRSF10C, ECE1, FCGR2B, GPR27, CD33, PTGDR, BAI1, SMAGP, CHRNB4, PCDHA13, PLA2R1, KCNQ1	113	2194	19235	1.78445	0.232403
GOTERM_CC_ALL	GO:0031224~intrinsic to membrane	47	4.90094	0.00708646	MFSD7, STEAP4, SLC44A3, JAG2, TLR2, CDH1, PCDHB13, APLNR, KCNS1, PRRG4, ECE1, PTGIS, TMEM171, SPINT2, EVI2A, GPR27, BAI1, TAP1, SMAGP, PLA2R1, ENTPD1, PCDHA13, ENTPD2, KCNQ1, SCN5A, MEST, HPN, TMC8, GPR157, NOXO1, SLC12A5, CFTR, AJAP1, GJB6, PCDHGB4, EVC2, TNFRSF10C, APOL1, CYP26C1, FCGR2B, IL20RA, CD33, PTGDR, CHRNB4, GBP3, CLEC14A, TMEM176B	99	5485	15908	1.3769	0.243292
GOTERM_BP_ALL	GO:0048646~anatomical structure formation involved in morphogenesis	8	0.834202	0.00637091	DLC1, HDAC3, ALDH1A3, NODAL, CASP8, NKX3-2, GBX2, CDH1	89	352	14116	3.6047	0.250498
GOTERM_CC_ALL	GO:0044459~plasma membrane part	26	2.71116	0.00150017	DLC1, TLR2, JAG2, CDH1, APLNR, KCNS1, ECE1, CASP8, TAP1, BAI1, PCDHA13, ENTPD1, PLA2R1, KCNQ1, SCN5A, HPN, NOXO1, SLC12A5, CFTR, GJB6, AJAP1, TNFRSF10C, PKP1, CD33, CHRNB4, COG2	99	2203	15908	1.89644	0.254913
UP_SEQ_FEATURE	transmembrane region	44	4.58811	0.00205871	MFSD7, STEAP4, SLC44A3, JAG2, TLR2, CDH1, PCDHB13, APLNR, KCNS1, PRRG4, ECE1, PTGIS, TMEM171, SPINT2, EVI2A, GPR27, BAI1, TAP1, SMAGP, PLA2R1, ENTPD1, PCDHA13, KCNQ1, SCN5A, ENTPD2, MEST, HPN, TMC8, GPR157, SLC12A5, CFTR, AJAP1, GJB6, PCDHGB4, EVC2, CYP26C1, FCGR2B, IL20RA, CD33, PTGDR, CHRNB4, GBP3, CLEC14A, TMEM176B	113	4911	19113	1.51542	0.260851
GOTERM_CC_ALL	GO:0016021~integral to membrane	46	4.79666	0.00618239	MFSD7, STEAP4, SLC44A3, JAG2, TLR2, CDH1, PCDHB13, APLNR, KCNS1, PRRG4, ECE1, PTGIS, TMEM171, SPINT2, EVI2A, GPR27, BAI1, TAP1, SMAGP, PLA2R1, ENTPD1, PCDHA13, KCNQ1, SCN5A, ENTPD2, MEST, HPN, TMC8, GPR157, NOXO1, SLC12A5, CFTR, AJAP1, GJB6, PCDHGB4, EVC2, TNFRSF10C, CYP26C1, FCGR2B, IL20RA, CD33, PTGDR, CHRNB4, GBP3, CLEC14A, TMEM176B	99	5297	15908	1.39543	0.262049
GOTERM_BP_ALL	GO:0021915~neural tube development	4	0.417101	0.00876339	DLC1, NODAL, CASP8, GBX2	89	68	14116	9.32981	0.275772
GOTERM_BP_ALL	GO:0009888~tissue development	11	1.14703	0.00827595	DLC1, CYP26C1, ALDH1A3, NODAL, CASP8, JAG2, GBX2, MBNL1, ISL1, FABP5, MEST	89	665	14116	2.62357	0.277427
GOTERM_BP_ALL	GO:0065008~regulation of biological quality	18	1.87696	0.00857887	DLC1, HPN, PDIA2, SLC12A5, TLR2, CFTR, APLNR, ECE1, CCL23, CYP26C1, NXN, RAC2, ALDH1A3, CHRNB4, ENTPD1, ENTPD2, KCNQ1, GLRX	89	1469	14116	1.94345	0.278205
SP_PIR_KEYWORDS	membrane	49	5.10949	0.0138276	STEAP4, SLC44A3, JAG2, TLR2, PTGIS, TMEM171, EVI2A, SPINT2, SMAGP, KCNQ1, DAB2IP, NOXO1, CFTR, AJAP1, PCDHGB4, EVC2, TNFRSF10C, IL20RA, CD33, PTGDR, GBP3, MFSD7, MAP4K2, CDH1, PCDHB13, APLNR, KCNS1, PRRG4, ECE1, GPR27, BAI1, TAP1, PCDHA13, ENTPD1, PLA2R1, SCN5A, ENTPD2, MEST, HPN, GPR157, TMC8, SLC12A5, GJB6, CYP26C1, FCGR2B, CHRNB4, TMEM176B, CLEC14A, COG2	113	6256	19235	1.33325	0.279629
GOTERM_BP_ALL	GO:0035239~tube morphogenesis	5	0.521376	0.00814568	DLC1, NODAL, GATA4, CASP8, GBX2	89	127	14116	6.24436	0.281671
GOTERM_BP_ALL	GO:0003002~regionalization	6	0.625652	0.00774034	CYP26C1, NODAL, GATA4, HOXA7, GBX2, ALX4	89	197	14116	4.83066	0.286507
GOTERM_BP_ALL	GO:0050789~regulation of biological process	57	5.94369	0.00802944	DLC1, PDIA2, C13ORF15, JAG2, TLR2, PTGIS, GATA4, CASP8, ALX4, KCNQ1, NET1, DAB2IP, SP100, NOXO1, EGR4, FOXJ1, NODAL, MBNL1, TOX2, FARP1, EYA4, TNFRSF10C, CD33, PTGDR, ESRP2, CREM, MAP4K2, MAP4K1, CDH1, APLNR, CCL23, ECE1, RAC2, GPR27, ALDH1A3, BAI1, HOXA7, NKX3-2, GBX2, SCN5A, GLRX, GPR157, MAP2K3, EN2, GJB6, ISL1, GAS6, HDAC3, PKP1, PENK, NXN, DUSP1, CYP26C1, FCGR2B, C7ORF16, HEYL, CHRNB4	89	7106	14116	1.27225	0.286615
SP_PIR_KEYWORDS	disulfide bond	27	2.81543	0.0161943	PDIA2, TLR2, JAG2, CDH1, CCL23, ECE1, PRRG4, GPR27, SPINT2, BAI1, ENTPD1, PLA2R1, ENTPD2, GLRX, HPN, NODAL, CHI3L2, GAS6, TNFRSF10C, FCGR2B, PENK, IL20RA, CD33, PTGDR, CHRNB4, FABP5, CLEC14A	113	2924	19235	1.57181	0.292579
GOTERM_CC_ALL	GO:0044425~membrane part	53	5.52659	0.0124598	DLC1, STEAP4, SLC44A3, JAG2, TLR2, PTGIS, TMEM171, EVI2A, SPINT2, CASP8, SMAGP, KCNQ1, NOXO1, CFTR, AJAP1, FARP1, PCDHGB4, EVC2, TNFRSF10C, IL20RA, CD33, PTGDR, GBP3, MFSD7, MAP4K2, CDH1, PCDHB13, APLNR, KCNS1, PRRG4, ECE1, GPR27, BAI1, TAP1, PLA2R1, PCDHA13, ENTPD1, ENTPD2, SCN5A, MEST, HPN, GPR157, TMC8, SLC12A5, GJB6, APOL1, PKP1, CYP26C1, FCGR2B, CHRNB4, CLEC14A, TMEM176B, COG2	99	6578	15908	1.29468	0.296062
SP_PIR_KEYWORDS	cell adhesion	8	0.834202	0.0117655	PKP1, CD33, BAI1, CDH1, PCDHB13, AJAP1, PCDHA13, PCDHGB4	113	422	19235	3.22694	0.301233
SP_PIR_KEYWORDS	Homeobox	6	0.625652	0.013669	HOXA7, NKX3-2, GBX2, EN2, ISL1, ALX4	113	242	19235	4.22036	0.305613
GOTERM_BP_ALL	GO:0048706~embryonic skeletal system development	4	0.417101	0.0122894	NODAL, HOXA7, NKX3-2, ALX4	89	77	14116	8.23931	0.310589
GOTERM_BP_ALL	GO:0042981~regulation of apoptosis	12	1.2513	0.0111206	DLC1, HDAC3, PTGIS, DUSP1, ALDH1A3, CASP8, NKX3-2, JAG2, TLR2, CDH1, ALX4, NET1	89	804	14116	2.36726	0.312565
GOTERM_BP_ALL	GO:0010941~regulation of cell death	12	1.2513	0.0122239	DLC1, HDAC3, PTGIS, DUSP1, ALDH1A3, CASP8, NKX3-2, JAG2, TLR2, CDH1, ALX4, NET1	89	815	14116	2.33531	0.315904
GOTERM_BP_ALL	GO:0003007~heart morphogenesis	4	0.417101	0.0106365	DLC1, NODAL, GATA4, ISL1	89	73	14116	8.69078	0.31621
UP_SEQ_FEATURE	glycosylation site:N-linked (GlcNAc...)	39	4.06674	0.00173428	STEAP4, SLC44A3, PDIA2, JAG2, TLR2, CDH1, PCDHB13, APLNR, ECE1, SPINT2, EVI2A, GPR27, BAI1, PLA2R1, ENTPD1, PCDHA13, KCNQ1, SCN5A, ENTPD2, MEST, WNT10A, HPN, TMC8, NODAL, EPHX3, SLC12A5, CHI3L2, CFTR, GAS6, PCDHGB4, EVC2, APOL1, FCGR2B, IL20RA, CD33, PTGDR, CHRNB4, GHDC, CLEC14A	113	4129	19113	1.59761	0.317419
GOTERM_BP_ALL	GO:0007507~heart development	6	0.625652	0.0110369	DLC1, ECE1, NODAL, GATA4, CASP8, ISL1	89	215	14116	4.42623	0.318112
GOTERM_BP_ALL	GO:0021983~pituitary gland development	3	0.312826	0.0130739	ALDH1A3, CDH1, ISL1	89	28	14116	16.9936	0.320175
GOTERM_BP_ALL	GO:0035295~tube development	6	0.625652	0.0121001	DLC1, NODAL, GATA4, CASP8, GBX2, CFTR	89	220	14116	4.32564	0.320194
GOTERM_CC_ALL	GO:0005887~integral to plasma membrane	16	1.6684	0.00593714	HPN, NOXO1, TLR2, JAG2, APLNR, KCNS1, TNFRSF10C, CD33, TAP1, BAI1, CHRNB4, PCDHA13, ENTPD1, PLA2R1, SCN5A, KCNQ1	99	1188	15908	2.16413	0.322299
GOTERM_BP_ALL	GO:0043067~regulation of programmed cell death	12	1.2513	0.011915	DLC1, HDAC3, PTGIS, DUSP1, ALDH1A3, CASP8, NKX3-2, JAG2, TLR2, CDH1, ALX4, NET1	89	812	14116	2.34394	0.323324
UP_SEQ_FEATURE	topological domain:Extracellular	28	2.91971	0.00357419	TLR2, JAG2, CDH1, PCDHB13, APLNR, ECE1, PRRG4, GPR27, SPINT2, EVI2A, BAI1, SMAGP, PCDHA13, ENTPD1, PLA2R1, ENTPD2, HPN, GPR157, CFTR, GJB6, AJAP1, PCDHGB4, FCGR2B, IL20RA, CD33, PTGDR, CHRNB4, CLEC14A	113	2719	19113	1.7418	0.325555
GOTERM_BP_ALL	GO:0007423~sensory organ development	6	0.625652	0.014186	ECE1, ALDH1A3, NKX3-2, JAG2, GBX2, GJB6	89	229	14116	4.15564	0.335529
UP_SEQ_FEATURE	topological domain:Cytoplasmic	32	3.33681	0.0055634	TLR2, JAG2, CDH1, PCDHB13, APLNR, KCNS1, ECE1, PRRG4, GPR27, EVI2A, SPINT2, TAP1, BAI1, SMAGP, PLA2R1, PCDHA13, ENTPD1, ENTPD2, HPN, TMC8, GPR157, SLC12A5, CFTR, GJB6, AJAP1, PCDHGB4, FCGR2B, IL20RA, CD33, PTGDR, CHRNB4, CLEC14A	113	3374	19113	1.60419	0.335767
UP_SEQ_FEATURE	DNA-binding region:Homeobox	6	0.625652	0.00524251	HOXA7, NKX3-2, GBX2, EN2, ISL1, ALX4	113	190	19113	5.34131	0.370327
GOTERM_BP_ALL	GO:0014033~neural crest cell differentiation	3	0.312826	0.0178988	CYP26C1, GBX2, ISL1	89	33	14116	14.4188	0.396141
GOTERM_BP_ALL	GO:0032526~response to retinoic acid	3	0.312826	0.0178988	SP100, DUSP1, MEST	89	33	14116	14.4188	0.396141
GOTERM_BP_ALL	GO:0014032~neural crest cell development	3	0.312826	0.0178988	CYP26C1, GBX2, ISL1	89	33	14116	14.4188	0.396141
GOTERM_BP_ALL	GO:0009181~purine ribonucleoside diphosphate catabolic process	2	0.208551	0.0185871	ENTPD1, ENTPD2	89	3	14116	105.738	0.400591
GOTERM_BP_ALL	GO:0009137~purine nucleoside diphosphate catabolic process	2	0.208551	0.0185871	ENTPD1, ENTPD2	89	3	14116	105.738	0.400591
GOTERM_BP_ALL	GO:0021536~diencephalon development	3	0.312826	0.0222177	ALDH1A3, CDH1, ISL1	89	37	14116	12.86	0.45063
GOTERM_BP_ALL	GO:0001667~ameboidal cell migration	3	0.312826	0.0222177	NODAL, GBX2, ISL1	89	37	14116	12.86	0.45063
SP_PIR_KEYWORDS	Cardiomyopathy	3	0.312826	0.0318521	EYA4, GATA4, SCN5A	113	48	19235	10.6388	0.464131
GOTERM_BP_ALL	GO:0042127~regulation of cell proliferation	11	1.14703	0.0243228	DLC1, CCL23, RAC2, EGR4, FOXJ1, CD33, NODAL, BAI1, GATA4, JAG2, GJB6	89	787	14116	2.21687	0.466288
GOTERM_BP_ALL	GO:0035023~regulation of Rho protein signal transduction	4	0.417101	0.0239058	DLC1, FOXJ1, FARP1, NET1	89	99	14116	6.40835	0.467788
GOTERM_BP_ALL	GO:0051239~regulation of multicellular organismal process	12	1.2513	0.030817	HDAC3, ECE1, FOXJ1, MAP2K3, NODAL, GATA4, HOXA7, CHRNB4, TLR2, ISL1, KCNQ1, SCN5A	89	937	14116	2.03125	0.474896
GOTERM_BP_ALL	GO:0048729~tissue morphogenesis	5	0.521376	0.0260438	DLC1, ALDH1A3, NODAL, CASP8, JAG2	89	180	14116	4.40574	0.475275
GOTERM_BP_ALL	GO:0001841~neural tube formation	3	0.312826	0.0257102	DLC1, NODAL, CASP8	89	40	14116	11.8955	0.477982
GOTERM_BP_ALL	GO:0009191~ribonucleoside diphosphate catabolic process	2	0.208551	0.0307884	ENTPD1, ENTPD2	89	5	14116	63.4427	0.48058
GOTERM_BP_ALL	GO:0010646~regulation of cell communication	13	1.35558	0.0271219	DLC1, DAB2IP, FOXJ1, MAP2K3, MAP4K1, FARP1, HDAC3, ECE1, CYP26C1, CASP8, CHRNB4, KCNQ1, NET1	89	1038	14116	1.9864	0.482234
GOTERM_BP_ALL	GO:0035148~tube lumen formation	3	0.312826	0.0306875	DLC1, NODAL, CASP8	89	44	14116	10.8141	0.485589
GOTERM_BP_ALL	GO:0022610~biological adhesion	10	1.04275	0.0303086	DLC1, PKP1, CD33, BAI1, CDH1, PCDHB13, AJAP1, PCDHA13, ENTPD1, PCDHGB4	89	701	14116	2.26258	0.48755
GOTERM_BP_ALL	GO:0033189~response to vitamin A	3	0.312826	0.0281541	SP100, DUSP1, MEST	89	42	14116	11.3291	0.488277
GOTERM_BP_ALL	GO:0001838~embryonic epithelial tube formation	3	0.312826	0.0294098	DLC1, NODAL, CASP8	89	43	14116	11.0656	0.490012
GOTERM_BP_ALL	GO:0048705~skeletal system morphogenesis	4	0.417101	0.0328048	NODAL, HOXA7, NKX3-2, ALX4	89	112	14116	5.66453	0.490627
GOTERM_BP_ALL	GO:0008015~blood circulation	5	0.521376	0.0289113	ECE1, MAP2K3, CFTR, KCNQ1, SCN5A	89	186	14116	4.26362	0.490722
GOTERM_BP_ALL	GO:0003013~circulatory system process	5	0.521376	0.0289113	ECE1, MAP2K3, CFTR, KCNQ1, SCN5A	89	186	14116	4.26362	0.490722
GOTERM_BP_ALL	GO:0007155~cell adhesion	10	1.04275	0.03007	DLC1, PKP1, CD33, BAI1, CDH1, PCDHB13, AJAP1, PCDHA13, ENTPD1, PCDHGB4	89	700	14116	2.26581	0.491212
GOTERM_CC_ALL	GO:0030054~cell junction	8	0.834202	0.040786	DLC1, PKP1, BAI1, CHRNB4, CDH1, AJAP1, GJB6, SCN5A	99	518	15908	2.48165	0.523824
GOTERM_CC_ALL	GO:0005911~cell-cell junction	5	0.521376	0.0298932	PKP1, BAI1, CDH1, GJB6, SCN5A	99	190	15908	4.2286	0.524579
GOTERM_BP_ALL	GO:0009134~nucleoside diphosphate catabolic process	2	0.208551	0.0368327	ENTPD1, ENTPD2	89	6	14116	52.8689	0.525792
GOTERM_CC_ALL	GO:0016020~membrane	55	5.73514	0.0379884	DLC1, STEAP4, SLC44A3, JAG2, TLR2, PTGIS, TMEM171, EVI2A, SPINT2, CASP8, SMAGP, KCNQ1, DAB2IP, NOXO1, CFTR, AJAP1, FARP1, PCDHGB4, EVC2, TNFRSF10C, IL20RA, CD33, PTGDR, GBP3, CCDC8, MFSD7, MAP4K2, CDH1, PCDHB13, APLNR, KCNS1, PRRG4, ECE1, GPR27, BAI1, TAP1, PLA2R1, PCDHA13, ENTPD1, ENTPD2, SCN5A, MEST, HPN, GPR157, TMC8, SLC12A5, GJB6, APOL1, PKP1, CYP26C1, FCGR2B, CHRNB4, CLEC14A, TMEM176B, COG2	99	7266	15908	1.21632	0.531905
SP_PIR_KEYWORDS	disease mutation	16	1.6684	0.0427378	WNT10A, NODAL, MAP2K3, CDH1, CFTR, GJB6, RSPH9, EVC2, ECE1, RAC2, SPINT2, CASP8, GATA4, ALX4, SCN5A, KCNQ1	113	1591	19235	1.71184	0.537748
GOTERM_BP_ALL	GO:0014031~mesenchymal cell development	3	0.312826	0.0402224	CYP26C1, GBX2, ISL1	89	51	14116	9.32981	0.551838
GOTERM_BP_ALL	GO:0048762~mesenchymal cell differentiation	3	0.312826	0.0402224	CYP26C1, GBX2, ISL1	89	51	14116	9.32981	0.551838
SP_PIR_KEYWORDS	signal	27	2.81543	0.0523362	PDIA2, TLR2, JAG2, CDH1, PCDHB13, CCL23, PRRG4, SPINT2, EVI2A, BAI1, PCDHA13, PLA2R1, WNT10A, NODAL, EPHX3, CHI3L2, GAS6, PCDHGB4, TNFRSF10C, APOL1, PENK, FCGR2B, IL20RA, CD33, CHRNB4, GHDC, CLEC14A	113	3250	19235	1.41415	0.556923
SP_PIR_KEYWORDS	DNA binding	6	0.625652	0.0487344	CREM, GATA4, HOXA7, GBX2, EN2, ISL1	113	340	19235	3.0039	0.557256
GOTERM_BP_ALL	GO:0060485~mesenchyme development	3	0.312826	0.0416653	CYP26C1, GBX2, ISL1	89	52	14116	9.15039	0.558851
GOTERM_BP_ALL	GO:0010310~regulation of hydrogen peroxide metabolic process	2	0.208551	0.0428397	RAC2, NOXO1	89	7	14116	45.3162	0.56324
GOTERM_BP_ALL	GO:0060263~regulation of respiratory burst	2	0.208551	0.0428397	RAC2, NOXO1	89	7	14116	45.3162	0.56324
GOTERM_CC_ALL	GO:0034702~ion channel complex	5	0.521376	0.0379083	KCNS1, CHRNB4, CFTR, KCNQ1, SCN5A	99	205	15908	3.91919	0.568985
GOTERM_BP_ALL	GO:0009966~regulation of signal transduction	11	1.14703	0.0461811	DLC1, DAB2IP, HDAC3, ECE1, CYP26C1, FOXJ1, MAP2K3, CASP8, MAP4K1, FARP1, NET1	89	878	14116	1.9871	0.573971
GOTERM_BP_ALL	GO:0048704~embryonic skeletal system morphogenesis	3	0.312826	0.0491633	NODAL, HOXA7, ALX4	89	57	14116	8.34772	0.575575
GOTERM_BP_ALL	GO:0010942~positive regulation of cell death	7	0.729927	0.054211	DLC1, PTGIS, DUSP1, ALDH1A3, CASP8, TLR2, NET1	89	435	14116	2.55229	0.576938
GOTERM_BP_ALL	GO:0006950~response to stress	17	1.77268	0.0556892	SP100, PDIA2, MAP2K3, TLR2, JAG2, MAP4K2, MAP4K1, EYA4, CCL23, ECE1, APOL1, HSPA2, DUSP1, PENK, TAP1, ENTPD1, ENTPD2	89	1685	14116	1.60019	0.577558
GOTERM_BP_ALL	GO:0042493~response to drug	5	0.521376	0.0459892	HDAC3, ALDH1A3, TLR2, CDH1, CFTR	89	216	14116	3.67145	0.578061
GOTERM_BP_ALL	GO:0045596~negative regulation of cell differentiation	5	0.521376	0.0459892	HDAC3, FOXJ1, NODAL, HOXA7, ISL1	89	216	14116	3.67145	0.578061
GOTERM_BP_ALL	GO:0002376~immune system process	12	1.2513	0.0454492	APOL1, SP100, CCL23, FCGR2B, FOXJ1, TAP1, CASP8, NKX3-2, MAP4K2, JAG2, TLR2, GBP3	89	998	14116	1.9071	0.579392
GOTERM_BP_ALL	GO:0030902~hindbrain development	3	0.312826	0.0538789	DLC1, GBX2, EN2	89	60	14116	7.93034	0.57946
GOTERM_BP_ALL	GO:0001501~skeletal system development	6	0.625652	0.0490327	NODAL, HOXA7, NKX3-2, JAG2, PAPSS1, ALX4	89	319	14116	2.9832	0.579897
GOTERM_BP_ALL	GO:0006821~chloride transport	3	0.312826	0.0554852	APOL1, SLC12A5, CFTR	89	61	14116	7.80033	0.580882
GOTERM_BP_ALL	GO:0060429~epithelium development	5	0.521376	0.0534042	DLC1, ALDH1A3, NODAL, CASP8, JAG2	89	227	14116	3.49354	0.581036
GOTERM_BP_ALL	GO:0009135~purine nucleoside diphosphate metabolic process	2	0.208551	0.0488096	ENTPD1, ENTPD2	89	8	14116	39.6517	0.583593
GOTERM_BP_ALL	GO:0009179~purine ribonucleoside diphosphate metabolic process	2	0.208551	0.0488096	ENTPD1, ENTPD2	89	8	14116	39.6517	0.583593
GOTERM_BP_ALL	GO:0050896~response to stimulus	30	3.12826	0.052467	PDIA2, MAP4K2, TLR2, JAG2, MAP4K1, CDH1, CCL23, ECE1, HSPA2, RAC2, ALDH1A3, CASP8, TAP1, ENTPD1, KCNQ1, ENTPD2, MEST, SP100, FOXJ1, MAP2K3, CFTR, EYA4, HDAC3, APOL1, PENK, DUSP1, FCGR2B, C7ORF16, CHRNB4, GBP3	89	3502	14116	1.35871	0.584393
GOTERM_BP_ALL	GO:0043068~positive regulation of programmed cell death	7	0.729927	0.0532366	DLC1, PTGIS, DUSP1, ALDH1A3, CASP8, TLR2, NET1	89	433	14116	2.56408	0.58482
GOTERM_BP_ALL	GO:0007156~homophilic cell adhesion	4	0.417101	0.0484883	CDH1, PCDHB13, PCDHA13, PCDHGB4	89	131	14116	4.84295	0.58661
GOTERM_BP_ALL	GO:0034754~cellular hormone metabolic process	3	0.312826	0.0522896	ECE1, CYP26C1, ALDH1A3	89	59	14116	8.06475	0.58823
GOTERM_BP_ALL	GO:0043065~positive regulation of apoptosis	7	0.729927	0.0517953	DLC1, PTGIS, DUSP1, ALDH1A3, CASP8, TLR2, NET1	89	430	14116	2.58197	0.589848
GOTERM_BP_ALL	GO:0045454~cell redox homeostasis	3	0.312826	0.0587479	NXN, PDIA2, GLRX	89	63	14116	7.5527	0.59301
SP_PIR_KEYWORDS	long qt syndrome	2	0.208551	0.0622331	KCNQ1, SCN5A	113	11	19235	30.9493	0.596719
GOTERM_BP_ALL	GO:0009185~ribonucleoside diphosphate metabolic process	2	0.208551	0.0606393	ENTPD1, ENTPD2	89	10	14116	31.7213	0.600373
GOTERM_BP_ALL	GO:0045941~positive regulation of transcription	8	0.834202	0.0619882	SP100, EGR4, MAP2K3, NODAL, GATA4, HOXA7, ISL1, ALX4	89	564	14116	2.24974	0.604146
PIR_SUPERFAMILY	PIRSF005696:nucleoside triphosphatase chromatin-associated	2	0.208551	0.0307217	ENTPD1, ENTPD2	47	5	7396	62.9447	0.607847
GOTERM_BP_ALL	GO:0006955~immune response	9	0.938478	0.0655892	APOL1, SP100, CCL23, FCGR2B, FOXJ1, TAP1, MAP4K2, TLR2, GBP3	89	690	14116	2.06878	0.607877
GOTERM_BP_ALL	GO:0080010~regulation of oxygen and reactive oxygen species metabolic process	2	0.208551	0.0664995	RAC2, NOXO1	89	11	14116	28.8376	0.60882
GOTERM_BP_ALL	GO:0042471~ear morphogenesis	3	0.312826	0.0637632	NKX3-2, GBX2, GJB6	89	66	14116	7.2094	0.610349
GOTERM_BP_ALL	GO:0033273~response to vitamin	3	0.312826	0.0637632	SP100, DUSP1, MEST	89	66	14116	7.2094	0.610349
GOTERM_BP_ALL	GO:0019725~cellular homeostasis	7	0.729927	0.0707108	CCL23, NXN, PDIA2, SLC12A5, CHRNB4, KCNQ1, GLRX	89	466	14116	2.3825	0.611437
GOTERM_BP_ALL	GO:0060562~epithelial tube morphogenesis	3	0.312826	0.0654662	DLC1, NODAL, CASP8	89	67	14116	7.10179	0.61151
GOTERM_BP_ALL	GO:0007165~signal transduction	25	2.60688	0.0648026	DLC1, CREM, TLR2, MAP4K2, MAP4K1, APLNR, CCL23, RAC2, GPR27, BAI1, NET1, DAB2IP, SP100, GPR157, MAP2K3, GAS6, TNFRSF10C, FCGR2B, DUSP1, PENK, PKP1, CD33, PTGDR, C7ORF16, CHRNB4	89	2840	14116	1.39619	0.612037
GOTERM_BP_ALL	GO:0051056~regulation of small GTPase mediated signal transduction	5	0.521376	0.0725281	DLC1, DAB2IP, FOXJ1, FARP1, NET1	89	252	14116	3.14696	0.613128
GOTERM_BP_ALL	GO:0006936~muscle contraction	4	0.417101	0.0704249	MAP2K3, CHRNB4, KCNQ1, SCN5A	89	153	14116	4.14658	0.613952
GOTERM_BP_ALL	GO:0042573~retinoic acid metabolic process	2	0.208551	0.0723235	CYP26C1, ALDH1A3	89	12	14116	26.4345	0.616022
GOTERM_BP_ALL	GO:0035050~embryonic heart tube development	2	0.208551	0.0723235	NODAL, GATA4	89	12	14116	26.4345	0.616022
GOTERM_BP_ALL	GO:0009987~cellular process	73	7.6121	0.0738677	KIFC2, DLC1, STEAP4, PDIA2, C13ORF15, TLR2, JAG2, PTGIS, SPINT2, GATA4, CASP8, ALX4, KCNQ1, NET1, SP100, NOXO1, EGR4, FOXJ1, NODAL, CFTR, AJAP1, MBNL1, TOX2, PCDHGB4, EYA4, TNFRSF10C, CD33, ESRP2, MFSD7, CREM, MAP4K2, MAP4K1, PCDHB13, CDH1, KCNS1, CCL23, ECE1, RAC2, HSPA2, KLC1, ALDH1A3, TAP1, BAI1, HOXA7, NKX3-2, GBX2, OXCT2, PLA2R1, PAPSS1, ENTPD1, PCDHA13, ENTPD2, SCN5A, GLRX, HPN, MAP2K3, SLC…	89	10541	14116	1.09841	0.616185
GOTERM_BP_ALL	GO:0048518~positive regulation of biological process	19	1.98123	0.075397	DLC1, SP100, EGR4, FOXJ1, NODAL, MAP2K3, TLR2, CDH1, ISL1, PTGIS, ECE1, DUSP1, RAC2, ALDH1A3, GATA4, CASP8, HOXA7, ALX4, NET1	89	2033	14116	1.48231	0.616278
GOTERM_BP_ALL	GO:0030900~forebrain development	4	0.417101	0.0693444	DLC1, ALDH1A3, CDH1, ISL1	89	152	14116	4.17386	0.616318
GOTERM_BP_ALL	GO:0010628~positive regulation of gene expression	8	0.834202	0.0702935	SP100, EGR4, MAP2K3, NODAL, GATA4, HOXA7, ISL1, ALX4	89	581	14116	2.18391	0.617347
GOTERM_BP_ALL	GO:0008285~negative regulation of cell proliferation	6	0.625652	0.0748932	DLC1, CCL23, FOXJ1, CD33, BAI1, GJB6	89	361	14116	2.63612	0.617564
GOTERM_BP_ALL	GO:0035270~endocrine system development	3	0.312826	0.0689177	ALDH1A3, CDH1, ISL1	89	69	14116	6.89595	0.618167
GOTERM_BP_ALL	GO:0030030~cell projection organization	6	0.625652	0.0798108	RAC2, FOXJ1, BAI1, GBX2, CDH1, ISL1	89	368	14116	2.58598	0.619395
GOTERM_BP_ALL	GO:0051093~negative regulation of developmental process	5	0.521376	0.0784356	HDAC3, FOXJ1, NODAL, HOXA7, ISL1	89	259	14116	3.06191	0.620088
GOTERM_BP_ALL	GO:0045893~positive regulation of transcription, DNA-dependent	7	0.729927	0.0771976	SP100, MAP2K3, NODAL, GATA4, HOXA7, ISL1, ALX4	89	477	14116	2.32756	0.621499
GOTERM_BP_ALL	GO:0051254~positive regulation of RNA metabolic process	7	0.729927	0.0796383	SP100, MAP2K3, NODAL, GATA4, HOXA7, ISL1, ALX4	89	481	14116	2.30821	0.622225
GOTERM_BP_ALL	GO:0048384~retinoic acid receptor signaling pathway	2	0.208551	0.0781116	SP100, CREM	89	13	14116	24.401	0.622235
GOTERM_BP_ALL	GO:0000122~negative regulation of transcription from RNA polymerase II promoter	5	0.521376	0.0845779	HDAC3, SP100, FOXJ1, NODAL, HOXA7	89	266	14116	2.98133	0.638052
GOTERM_BP_ALL	GO:0010604~positive regulation of macromolecule metabolic process	10	1.04275	0.0855419	DLC1, ECE1, SP100, EGR4, MAP2K3, NODAL, GATA4, HOXA7, ISL1, ALX4	89	857	14116	1.85072	0.638823
GOTERM_BP_ALL	GO:0003012~muscle system process	4	0.417101	0.0875261	MAP2K3, CHRNB4, KCNQ1, SCN5A	89	168	14116	3.77635	0.640577
GOTERM_BP_ALL	GO:0048839~inner ear development	3	0.312826	0.08702	JAG2, GBX2, GJB6	89	79	14116	6.02304	0.641863
SMART	SM00112:CA	4	0.417101	0.0314963	CDH1, PCDHB13, PCDHA13, PCDHGB4	59	108	9079	5.69931	0.657711
GOTERM_BP_ALL	GO:0045935~positive regulation of nucleobase, nucleoside, nucleotide and nucleic acid metabolic process	8	0.834202	0.0941639	SP100, EGR4, MAP2K3, NODAL, GATA4, HOXA7, ISL1, ALX4	89	624	14116	2.03342	0.665259
GOTERM_BP_ALL	GO:0001829~trophectodermal cell differentiation	2	0.208551	0.0952626	NODAL, CDH1	89	16	14116	19.8258	0.666287
GOTERM_BP_ALL	GO:0001701~in utero embryonic development	4	0.417101	0.0973003	NODAL, GATA4, CDH1, MBNL1	89	176	14116	3.6047	0.667661
GOTERM_BP_ALL	GO:0031325~positive regulation of cellular metabolic process	10	1.04275	0.0969298	DLC1, ECE1, SP100, EGR4, MAP2K3, NODAL, GATA4, HOXA7, ISL1, ALX4	89	880	14116	1.80235	0.669565
SMART	SM00389:HOX	6	0.625652	0.0167539	HOXA7, NKX3-2, GBX2, EN2, ISL1, ALX4	59	235	9079	3.92889	0.677619
UP_SEQ_FEATURE	domain:Cadherin 5	4	0.417101	0.018361	CDH1, PCDHB13, PCDHA13, PCDHGB4	113	95	19113	7.12175	0.688031
UP_SEQ_FEATURE	domain:Cadherin 1	4	0.417101	0.0238492	CDH1, PCDHB13, PCDHA13, PCDHGB4	113	105	19113	6.44349	0.692749
UP_SEQ_FEATURE	domain:Cadherin 2	4	0.417101	0.0238492	CDH1, PCDHB13, PCDHA13, PCDHGB4	113	105	19113	6.44349	0.692749
INTERPRO	IPR012287:Homeodomain-related	6	0.625652	0.0121854	HOXA7, NKX3-2, GBX2, EN2, ISL1, ALX4	97	238	16659	4.32964	0.69926
UP_SEQ_FEATURE	domain:Cadherin 4	4	0.417101	0.0221195	CDH1, PCDHB13, PCDHA13, PCDHGB4	113	102	19113	6.633	0.707774
UP_SEQ_FEATURE	domain:Cadherin 3	4	0.417101	0.0221195	CDH1, PCDHB13, PCDHA13, PCDHGB4	113	102	19113	6.633	0.707774
SP_PIR_KEYWORDS	calcium	9	0.938478	0.0966434	JAG2, CDH1, PCDHB13, PCDHA13, ENTPD1, ENTPD2, GAS6, MYLK, PCDHGB4	113	803	19235	1.90783	0.739903
PIR_SUPERFAMILY	PIRSF038172:mitogen-activated protein kinase kinase kinase kinase	2	0.208551	0.0246521	MAP4K2, MAP4K1	47	4	7396	78.6809	0.776348
BIOCARTA	h_nthiPathway:NFkB activation by Nontypeable Hemophilus influenzae	3	0.312826	0.0312116	DUSP1, MAP2K3, TLR2	18	24	1437	9.97917	0.781733
GOTERM_CC_ALL	GO:0070161~anchoring junction	4	0.417101	0.0900124	DLC1, PKP1, CDH1, AJAP1	99	172	15908	3.7369	0.785754
GOTERM_CC_ALL	GO:0005605~basal lamina	2	0.208551	0.0997692	ENTPD1, ENTPD2	99	17	15908	18.9043	0.79498
UP_SEQ_FEATURE	disulfide bond	25	2.60688	0.0357036	PDIA2, TLR2, JAG2, CDH1, CCL23, ECE1, PRRG4, GPR27, SPINT2, BAI1, PLA2R1, GLRX, HPN, NODAL, CHI3L2, GAS6, TNFRSF10C, FCGR2B, PENK, IL20RA, CD33, PTGDR, CHRNB4, FABP5, CLEC14A	113	2819	19113	1.50001	0.79804
KEGG_PATHWAY	hsa04010:MAPK signaling pathway	6	0.625652	0.0241472	HSPA2, DUSP1, RAC2, MAP2K3, MAP4K2, MAP4K1	33	267	5085	3.46272	0.805576
INTERPRO	IPR000639:Epoxide hydrolase-like	2	0.208551	0.0284865	EPHX3, MEST	97	5	16659	68.6969	0.817193
INTERPRO	IPR001356:Homeobox	6	0.625652	0.0115843	HOXA7, NKX3-2, GBX2, EN2, ISL1, ALX4	97	235	16659	4.38491	0.819647
INTERPRO	IPR002126:Cadherin	4	0.417101	0.0245066	CDH1, PCDHB13, PCDHA13, PCDHGB4	97	108	16659	6.36082	0.838568
INTERPRO	IPR017857:Coagulation factor, subset, Gla region	2	0.208551	0.0506962	PRRG4, GAS6	97	9	16659	38.1649	0.852211
INTERPRO	IPR000407:Nucleoside phosphatase GDA1/CD39	2	0.208551	0.0451913	ENTPD1, ENTPD2	97	8	16659	42.9356	0.856621
SMART	SM00036:CNH	2	0.208551	0.0858756	MAP4K2, MAP4K1	59	14	9079	21.9831	0.865377
SMART	SM00069:GLA	2	0.208551	0.0858756	PRRG4, GAS6	59	14	9079	21.9831	0.865377
INTERPRO	IPR013164:Cadherin, N-terminal	3	0.312826	0.0440985	PCDHB13, PCDHA13, PCDHGB4	97	58	16659	8.88322	0.890291
INTERPRO	IPR002383:Coagulation factor, Gla region	2	0.208551	0.0670231	PRRG4, GAS6	97	12	16659	28.6237	0.896299
INTERPRO	IPR002403:Cytochrome P450, E-class, group IV	2	0.208551	0.0670231	PTGIS, CYP26C1	97	12	16659	28.6237	0.896299
UP_SEQ_FEATURE	signal peptide	27	2.81543	0.0558324	PDIA2, TLR2, JAG2, CDH1, PCDHB13, CCL23, PRRG4, SPINT2, EVI2A, BAI1, PCDHA13, PLA2R1, WNT10A, NODAL, EPHX3, CHI3L2, GAS6, PCDHGB4, TNFRSF10C, APOL1, PENK, FCGR2B, IL20RA, CD33, CHRNB4, GHDC, CLEC14A	113	3250	19113	1.40518	0.899547
INTERPRO	IPR000294:Gamma-carboxyglutamic acid-rich (GLA) domain	2	0.208551	0.077753	PRRG4, GAS6	97	14	16659	24.5346	0.907422
INTERPRO	IPR001180:Citron-like	2	0.208551	0.077753	MAP4K2, MAP4K1	97	14	16659	24.5346	0.907422
GOTERM_MF_ALL	GO:0016818~hydrolase activity, acting on acid anhydrides, in phosphorus-containing anhydrides	9	0.938478	0.0994832	KIFC2, RAC2, KLC1, MYO1B, TAP1, CFTR, ENTPD1, ENTPD2, GBP3	95	760	15143	1.88763	0.91983
UP_SEQ_FEATURE	domain:CNH	2	0.208551	0.0844124	MAP4K2, MAP4K1	113	15	19113	22.5522	0.924746
UP_SEQ_FEATURE	domain:Cadherin 6	3	0.312826	0.0683699	PCDHB13, PCDHA13, PCDHGB4	113	73	19113	6.95102	0.925482
UP_SEQ_FEATURE	compositionally biased region:Poly-Ala	6	0.625652	0.0814361	KCNS1, DAB2IP, GATA4, HOXA7, NKX3-2, GBX2	113	393	19113	2.58231	0.930724
GOTERM_MF_ALL	GO:0016462~pyrophosphatase activity	9	0.938478	0.0978038	KIFC2, RAC2, KLC1, MYO1B, TAP1, CFTR, ENTPD1, ENTPD2, GBP3	95	757	15143	1.89511	0.933068
UP_SEQ_FEATURE	domain:Gla	2	0.208551	0.0790116	PRRG4, GAS6	113	14	19113	24.1631	0.93832
GOTERM_MF_ALL	GO:0005216~ion channel activity	6	0.625652	0.0921461	KCNS1, APOL1, CHRNB4, CFTR, KCNQ1, SCN5A	95	386	15143	2.47772	0.938813
UP_SEQ_FEATURE	active site:Nucleophile	4	0.417101	0.0996624	EYA4, PDIA2, ALDH1A3, EPHX3	113	189	19113	3.57972	0.944262
GOTERM_MF_ALL	GO:0005083~small GTPase regulator activity	5	0.521376	0.0909216	DLC1, MAP4K2, MAP4K1, FARP1, NET1	95	274	15143	2.90876	0.953157
GOTERM_MF_ALL	GO:0017111~nucleoside-triphosphatase activity	9	0.938478	0.0824242	KIFC2, RAC2, KLC1, MYO1B, TAP1, CFTR, ENTPD1, ENTPD2, GBP3	95	728	15143	1.9706	0.955286
INTERPRO	IPR017970:Homeobox, conserved site	6	0.625652	0.0110038	HOXA7, NKX3-2, GBX2, EN2, ISL1, ALX4	97	232	16659	4.44161	0.961344
GOTERM_MF_ALL	GO:0003700~transcription factor activity	11	1.14703	0.0800001	EGR4, FOXJ1, CREM, GATA4, HEYL, HOXA7, NKX3-2, GBX2, EN2, ISL1, ALX4	95	975	15143	1.79836	0.968015
GOTERM_MF_ALL	GO:0005509~calcium ion binding	11	1.14703	0.0584935	PRRG4, EML1, JAG2, CDH1, PCDHB13, PCDHA13, ENTPD1, ENTPD2, GAS6, MYLK, PCDHGB4	95	919	15143	1.90794	0.969311
GOTERM_MF_ALL	GO:0005251~delayed rectifier potassium channel activity	2	0.208551	0.0720239	KCNS1, KCNQ1	95	12	15143	26.5667	0.972688
GOTERM_MF_ALL	GO:0017110~nucleoside-diphosphatase activity	2	0.208551	0.0545142	ENTPD1, ENTPD2	95	9	15143	35.4222	0.982579
GOTERM_MF_ALL	GO:0005515~protein binding	60	6.25652	0.0501654	KIFC2, DLC1, PDIA2, C13ORF15, JAG2, TLR2, LRRC56, GATA4, CASP8, ALX4, KCNQ1, DAB2IP, SP100, NOXO1, FOXJ1, NODAL, PRKCDBP, CFTR, AJAP1, FARP1, PCDHGB4, EML1, IL20RA, CD33, CREM, MAP4K2, MAP4K1, PCDHB13, CDH1, KCNS1, CCL23, ECE1, HSPA2, RAC2, KLC1, ALDH1A3, BAI1, TAP1, HOXA7, PCDHA13, ENTPD2, SCN5A, MEST, GLRX, MYO1B, MAP2K3, SLC12A5, GJB6, ISL1, GAS6, HDAC3, APOL1, PKP1, PENK, DUSP1, FCGR2B, HEYL,…	95	8154	15143	1.17292	0.992973
GOTERM_MF_ALL	GO:0009055~electron carrier activity	5	0.521376	0.0487448	STEAP4, PAOX, PTGIS, CYP26C1, GLRX	95	221	15143	3.60633	0.999269
GOTERM_MF_ALL	GO:0043565~sequence-specific DNA binding	9	0.938478	0.0347978	FOXJ1, CREM, GATA4, HOXA7, NKX3-2, GBX2, EN2, ISL1, ALX4	95	607	15143	2.36343	0.999964

## Sheet: DAVID gene cluster 3
Category	Term	Count	%	PValue	Genes	List Total	Pop Hits	Pop Total	Fold Enrichment	Benjamini
INTERPRO	IPR012287:Homeodomain-related	6	1.13636	0.000784751	MSX2, IRX2, BARHL2, ONECUT2, TLX3, ISL1	52	238	16659	8.07644	0.035216
INTERPRO	IPR001356:Homeobox	6	1.13636	0.000741207	MSX2, IRX2, BARHL2, ONECUT2, TLX3, ISL1	52	235	16659	8.17954	0.0495232
SMART	SM00389:HOX	6	1.13636	0.00167758	MSX2, IRX2, BARHL2, ONECUT2, TLX3, ISL1	35	235	9079	6.62298	0.0554869
GOTERM_BP_FAT	GO:0007267~cell-cell signaling	10	1.89394	0.000187908	NPY, SSTR1, DRD5, SYN2, CARTPT, ADRA2C, IGF2, SRD5A2, CXCL6, HTR1E	48	600	13528	4.69722	0.0718913
SP_PIR_KEYWORDS	Homeobox	6	1.13636	0.000578788	MSX2, IRX2, BARHL2, ONECUT2, TLX3, ISL1	55	242	19235	8.67092	0.0757179
GOTERM_BP_FAT	GO:0007186~G-protein coupled receptor protein signaling pathway	13	2.46212	0.000342883	GPR83, PTGER2, DRD5, GPR6, IGF2, NPR3, CXCL6, NPY, SSTR1, CARTPT, ADRA2C, D4S234E, HTR1E	48	1123	13528	3.26254	0.0867678
GOTERM_BP_FAT	GO:0045165~cell fate commitment	6	1.13636	0.000115549	FOXA1, BARHL2, ONECUT2, NEUROG1, TLX3, ISL1	48	139	13528	12.1655	0.0876678
INTERPRO	IPR017970:Homeobox, conserved site	6	1.13636	0.000699499	MSX2, IRX2, BARHL2, ONECUT2, TLX3, ISL1	52	232	16659	8.28531	0.0914132
SP_PIR_KEYWORDS	dna-binding	14	2.65152	0.00162277	IRX2, ONECUT2, BARHL2, FOXA1, NEUROG1, HMG20B, ISL1, ZNF177, MSX2, OLIG3, BNC1, IRF8, FOXB1, TLX3	55	1868	19235	2.62108	0.104558
GOTERM_MF_FAT	GO:0003700~transcription factor activity	12	2.27273	0.00069211	MSX2, IRX2, FOXA1, IRF8, BARHL2, BNC1, ONECUT2, NEUROG1, HMG20B, FOXB1, TLX3, ISL1	49	975	12983	3.26104	0.109805
GOTERM_MF_FAT	GO:0043565~sequence-specific DNA binding	9	1.70455	0.00156916	MSX2, IRX2, FOXA1, IRF8, BARHL2, ONECUT2, FOXB1, TLX3, ISL1	49	607	12983	3.92855	0.123582
GOTERM_BP_FAT	GO:0007187~G-protein signaling, coupled to cyclic nucleotide second messenger	5	0.94697	0.000666828	NPY, SSTR1, DRD5, NPR3, HTR1E	48	115	13528	12.2536	0.124018
SP_PIR_KEYWORDS	G protein-coupled receptor	4	0.757576	0.00423827	SSTR1, DRD5, ADRA2C, HTR1E	55	116	19235	12.0596	0.134465
GOTERM_MF_FAT	GO:0030528~transcription regulator activity	14	2.65152	0.00263373	IRX2, ONECUT2, BARHL2, FOXA1, NEUROG1, HMG20B, ISL1, MSX2, OLIG3, BNC1, IRF8, VGLL2, FOXB1, TLX3	49	1512	12983	2.45333	0.137296
SP_PIR_KEYWORDS	transcription regulation	14	2.65152	0.00334579	ONECUT2, BARHL2, FOXA1, NEUROG1, HMG20B, ISL1, ZNF177, MSX2, OLIG3, BNC1, IRF8, TCEB2, VGLL2, FOXB1	55	2026	19235	2.41667	0.140952
KEGG_PATHWAY	hsa04080:Neuroactive ligand-receptor interaction	6	1.13636	0.0032539	GPR83, PTGER2, SSTR1, DRD5, ADRA2C, HTR1E	22	256	5085	5.41726	0.15314
GOTERM_BP_FAT	GO:0019935~cyclic-nucleotide-mediated signaling	5	0.94697	0.00105479	NPY, SSTR1, DRD5, NPR3, HTR1E	48	130	13528	10.8397	0.154299
GOTERM_BP_FAT	GO:0006355~regulation of transcription, DNA-dependent	15	2.84091	0.00210633	IRX2, ONECUT2, BARHL2, FOXA1, NEUROG1, HMG20B, IGF2, ISL1, ZNF177, MSX2, IRF8, VGLL2, FOXB1, TLX3, MAPRE3	48	1773	13528	2.38438	0.243484
GOTERM_BP_FAT	GO:0051252~regulation of RNA metabolic process	15	2.84091	0.00260496	IRX2, ONECUT2, BARHL2, FOXA1, NEUROG1, HMG20B, IGF2, ISL1, ZNF177, MSX2, IRF8, VGLL2, FOXB1, TLX3, MAPRE3	48	1813	13528	2.33177	0.25611
GOTERM_BP_FAT	GO:0003013~circulatory system process	5	0.94697	0.00389155	NPY, DRD5, CARTPT, NPR3, KCNQ1	48	186	13528	7.57616	0.266254
GOTERM_BP_FAT	GO:0008015~blood circulation	5	0.94697	0.00389155	NPY, DRD5, CARTPT, NPR3, KCNQ1	48	186	13528	7.57616	0.266254
INTERPRO	IPR002861:Reeler region	2	0.378788	0.00915668	RELN, SPON1	52	3	16659	213.577	0.270256
GOTERM_BP_FAT	GO:0007242~intracellular signaling cascade	12	2.27273	0.0032135	NPY, SSTR1, RALBP1, RASSF1, DRD5, CARTPT, ADRA2C, IGF2, NPR3, RALGDS, PRKCB, HTR1E	48	1256	13528	2.69268	0.273454
GOTERM_BP_FAT	GO:0008217~regulation of blood pressure	4	0.757576	0.00502108	NPY, DRD5, CARTPT, NPR3	48	100	13528	11.2733	0.283276
GOTERM_BP_FAT	GO:0060284~regulation of cell development	5	0.94697	0.00549032	FOXA1, BARHL2, IGF2, TLX3, ISL1	48	205	13528	6.87398	0.28556
GOTERM_BP_FAT	GO:0030182~neuron differentiation	7	1.32576	0.00388304	FOXA1, BARHL2, ONECUT2, NEUROG1, RELN, TLX3, ISL1	48	438	13528	4.50419	0.29053
GOTERM_BP_FAT	GO:0045449~regulation of transcription	18	3.40909	0.00481533	IRX2, ONECUT2, BARHL2, FOXA1, NEUROG1, HMG20B, IGF2, ZNF177, ISL1, MSX2, OLIG3, IRF8, BNC1, TCEB2, VGLL2, FOXB1, TLX3, MAPRE3	48	2601	13528	1.9504	0.294197
GOTERM_BP_FAT	GO:0009891~positive regulation of biosynthetic process	8	1.51515	0.00959681	DRD5, FOXA1, BARHL2, ONECUT2, VGLL2, IGF2, ISL1, MAPRE3	48	695	13528	3.24412	0.305528
GOTERM_BP_FAT	GO:0048663~neuron fate commitment	3	0.568182	0.00931152	FOXA1, TLX3, ISL1	48	42	13528	20.131	0.310231
GOTERM_BP_FAT	GO:0031328~positive regulation of cellular biosynthetic process	8	1.51515	0.00889693	DRD5, FOXA1, BARHL2, ONECUT2, VGLL2, IGF2, ISL1, MAPRE3	48	685	13528	3.29148	0.311653
GOTERM_BP_FAT	GO:0007166~cell surface receptor linked signal transduction	14	2.65152	0.00887437	GPR83, PTGER2, DRD5, GPR6, IGF2, NPR3, CXCL6, MSX2, NPY, SSTR1, CARTPT, ADRA2C, D4S234E, HTR1E	48	1856	13528	2.1259	0.32511
GOTERM_BP_FAT	GO:0033861~negative regulation of NAD(P)H oxidase activity	2	0.378788	0.00693674	DRD5, IGF2	48	2	13528	281.833	0.326174
GOTERM_BP_FAT	GO:0045664~regulation of neuron differentiation	4	0.757576	0.0109916	FOXA1, BARHL2, TLX3, ISL1	48	133	13528	8.47619	0.328939
GOTERM_BP_FAT	GO:0043085~positive regulation of catalytic activity	7	1.32576	0.00883113	RALBP1, DRD5, CARTPT, ADRA2C, IGF2, RELN, NPR3	48	520	13528	3.79391	0.339196
GOTERM_BP_FAT	GO:0033500~carbohydrate homeostasis	3	0.568182	0.0125239	FOXA1, CARTPT, IGF2	48	49	13528	17.2551	0.340946
GOTERM_BP_FAT	GO:0042593~glucose homeostasis	3	0.568182	0.0125239	FOXA1, CARTPT, IGF2	48	49	13528	17.2551	0.340946
GOTERM_BP_FAT	GO:0006357~regulation of transcription from RNA polymerase II promoter	8	1.51515	0.0121111	FOXA1, IRF8, BARHL2, ONECUT2, NEUROG1, VGLL2, ISL1, ZNF177	48	727	13528	3.10133	0.34338
GOTERM_MF_FAT	GO:0008227~amine receptor activity	3	0.568182	0.0100129	DRD5, ADRA2C, HTR1E	49	41	12983	19.3873	0.344699
GOTERM_BP_FAT	GO:0048878~chemical homeostasis	7	1.32576	0.00821218	DRD5, FOXA1, GPR6, CARTPT, IGF2, KCNQ1, PRKCB	48	512	13528	3.85319	0.353701
GOTERM_BP_FAT	GO:0019932~second-messenger-mediated signaling	5	0.94697	0.00882468	NPY, SSTR1, DRD5, NPR3, HTR1E	48	235	13528	5.99645	0.355879
GOTERM_BP_FAT	GO:0033860~regulation of NAD(P)H oxidase activity	2	0.378788	0.0138264	DRD5, IGF2	48	4	13528	140.917	0.357372
GOTERM_BP_FAT	GO:0044093~positive regulation of molecular function	7	1.32576	0.015285	RALBP1, DRD5, CARTPT, ADRA2C, IGF2, RELN, NPR3	48	586	13528	3.36661	0.375238
SP_PIR_KEYWORDS	nucleus	19	3.59848	0.0408317	IRX2, ONECUT2, BARHL2, FOXA1, NEUROG1, HMG20B, ZNF177, ISL1, MSX2, PPP1CA, OLIG3, PKP2, RASSF1, IRF8, BNC1, TCEB2, VGLL2, FOXB1, TLX3	55	4283	19235	1.55144	0.376541
PIR_SUPERFAMILY	PIRSF800006:rhodopsin-like G protein-coupled receptors	7	1.32576	0.0159241	GPR83, PTGER2, SSTR1, DRD5, GPR6, ADRA2C, HTR1E	24	686	7396	3.14456	0.382186
SP_PIR_KEYWORDS	transducer	7	1.32576	0.0350428	GPR83, PTGER2, SSTR1, DRD5, GPR6, ADRA2C, HTR1E	55	874	19235	2.80102	0.384385
SP_PIR_KEYWORDS	disulfide bond	15	2.84091	0.0281577	GPR83, PTGER2, DRD5, IGF2, NPR3, CXCL6, SSTR1, SMOC1, IL4R, CARTPT, ADRA2C, KLK10, RELN, SPON1, HTR1E	55	2924	19235	1.79409	0.384641
UP_SEQ_FEATURE	DNA-binding region:Homeobox	5	0.94697	0.00203021	MSX2, BARHL2, ONECUT2, TLX3, ISL1	55	190	19113	9.14498	0.395893
SP_PIR_KEYWORDS	cell cycle	5	0.94697	0.0402361	PPP1CA, RASSF1, KLK10, HMG20B, MAPRE3	55	461	19235	3.79314	0.398152
SP_PIR_KEYWORDS	transmembrane protein	6	1.13636	0.0336704	SSTR1, IL4R, DRD5, ADRA2C, NPR3, HTR1E	55	642	19235	3.26848	0.404027
INTERPRO	IPR000276:7TM GPCR, rhodopsin-like	7	1.32576	0.0229669	GPR83, PTGER2, SSTR1, DRD5, GPR6, ADRA2C, HTR1E	52	727	16659	3.08467	0.411705
SP_PIR_KEYWORDS	Transcription	12	2.27273	0.0269683	OLIG3, FOXA1, IRF8, BARHL2, BNC1, ONECUT2, TCEB2, NEUROG1, VGLL2, HMG20B, FOXB1, ZNF177	55	2071	19235	2.02643	0.412072
GOTERM_BP_FAT	GO:0001764~neuron migration	3	0.568182	0.0207748	BARHL2, RELN, TLX3	48	64	13528	13.2109	0.42629
GOTERM_BP_FAT	GO:0045935~positive regulation of nucleobase, nucleoside, nucleotide and nucleic acid metabolic process	7	1.32576	0.0202204	DRD5, FOXA1, ONECUT2, VGLL2, IGF2, ISL1, MAPRE3	48	624	13528	3.16159	0.428388
GOTERM_BP_FAT	GO:0051173~positive regulation of nitrogen compound metabolic process	7	1.32576	0.023215	DRD5, FOXA1, ONECUT2, VGLL2, IGF2, ISL1, MAPRE3	48	644	13528	3.06341	0.431727
GOTERM_BP_FAT	GO:0050767~regulation of neurogenesis	4	0.757576	0.0198323	FOXA1, BARHL2, TLX3, ISL1	48	166	13528	6.79116	0.433364
GOTERM_BP_FAT	GO:0007610~behavior	6	1.13636	0.0227374	NPY, RALBP1, DRD5, CARTPT, RELN, CXCL6	48	469	13528	3.60554	0.434861
GOTERM_BP_FAT	GO:0044057~regulation of system process	5	0.94697	0.0220461	DRD5, CARTPT, IGF2, TLX3, KCNQ1	48	309	13528	4.56041	0.435029
GOTERM_BP_FAT	GO:0007268~synaptic transmission	5	0.94697	0.0195886	NPY, DRD5, SYN2, CARTPT, HTR1E	48	298	13528	4.72875	0.441091
GOTERM_BP_FAT	GO:0010557~positive regulation of macromolecule biosynthetic process	7	1.32576	0.02482	FOXA1, BARHL2, ONECUT2, VGLL2, IGF2, ISL1, MAPRE3	48	654	13528	3.01656	0.443971
SP_PIR_KEYWORDS	developmental protein	7	1.32576	0.0214487	MSX2, INA, FOXA1, NEUROG1, RELN, TLX3, ISL1	55	779	19235	3.14261	0.445535
SP_PIR_KEYWORDS	g-protein coupled receptor	7	1.32576	0.0262162	GPR83, PTGER2, SSTR1, DRD5, GPR6, ADRA2C, HTR1E	55	816	19235	3.00011	0.452374
GOTERM_BP_FAT	GO:0032095~regulation of response to food	2	0.378788	0.0274656	NPY, CARTPT	48	8	13528	70.4583	0.468362
GOTERM_BP_FAT	GO:0032098~regulation of appetite	2	0.378788	0.0274656	NPY, CARTPT	48	8	13528	70.4583	0.468362
INTERPRO	IPR017452:GPCR, rhodopsin-like superfamily	7	1.32576	0.0228299	GPR83, PTGER2, SSTR1, DRD5, GPR6, ADRA2C, HTR1E	52	726	16659	3.08892	0.468893
GOTERM_BP_FAT	GO:0051960~regulation of nervous system development	4	0.757576	0.0289068	FOXA1, BARHL2, TLX3, ISL1	48	192	13528	5.87153	0.47636
GOTERM_BP_FAT	GO:0045859~regulation of protein kinase activity	5	0.94697	0.0313763	DRD5, CARTPT, ADRA2C, IGF2, RELN	48	345	13528	4.08454	0.486295
GOTERM_BP_FAT	GO:0008343~adult feeding behavior	2	0.378788	0.0308464	NPY, CARTPT	48	9	13528	62.6296	0.489504
GOTERM_BP_FAT	GO:0019226~transmission of nerve impulse	5	0.94697	0.0328315	NPY, DRD5, SYN2, CARTPT, HTR1E	48	350	13528	4.02619	0.493197
GOTERM_BP_FAT	GO:0043549~regulation of kinase activity	5	0.94697	0.0349349	DRD5, CARTPT, ADRA2C, IGF2, RELN	48	357	13528	3.94725	0.497743
GOTERM_BP_FAT	GO:0006349~genetic imprinting	2	0.378788	0.0342158	IGF2, KCNQ1	48	10	13528	56.3667	0.498963
SP_PIR_KEYWORDS	hormone receptor	2	0.378788	0.0652838	SSTR1, NPR3	55	24	19235	29.1439	0.506525
GOTERM_BP_FAT	GO:0048015~phosphoinositide-mediated signaling	3	0.568182	0.0374339	NPY, DRD5, NPR3	48	88	13528	9.60795	0.513863
GOTERM_BP_FAT	GO:0051338~regulation of transferase activity	5	0.94697	0.0397034	DRD5, CARTPT, ADRA2C, IGF2, RELN	48	372	13528	3.78808	0.51861
GOTERM_BP_FAT	GO:0055082~cellular chemical homeostasis	5	0.94697	0.0423928	DRD5, GPR6, CARTPT, KCNQ1, PRKCB	48	380	13528	3.70833	0.518954
GOTERM_BP_FAT	GO:0045596~negative regulation of cell differentiation	4	0.757576	0.0389363	IL4R, CARTPT, TLX3, ISL1	48	216	13528	5.21914	0.519695
GOTERM_BP_FAT	GO:0042592~homeostatic process	7	1.32576	0.0443858	DRD5, FOXA1, GPR6, CARTPT, IGF2, KCNQ1, PRKCB	48	751	13528	2.62694	0.520821
SP_PIR_KEYWORDS	receptor	9	1.70455	0.0729995	GPR83, PTGER2, SSTR1, IL4R, DRD5, GPR6, ADRA2C, NPR3, HTR1E	55	1583	19235	1.98834	0.521143
GOTERM_BP_FAT	GO:0045860~positive regulation of protein kinase activity	4	0.757576	0.0421562	CARTPT, ADRA2C, IGF2, RELN	48	223	13528	5.05531	0.524523
GOTERM_BP_FAT	GO:0007218~neuropeptide signaling pathway	3	0.568182	0.0413819	NPY, SSTR1, CARTPT	48	93	13528	9.0914	0.525597
GOTERM_BP_FAT	GO:0033674~positive regulation of kinase activity	4	0.757576	0.0459965	CARTPT, ADRA2C, IGF2, RELN	48	231	13528	4.88023	0.526573
GOTERM_BP_FAT	GO:0032107~regulation of response to nutrient levels	2	0.378788	0.0442552	NPY, CARTPT	48	13	13528	43.359	0.527041
GOTERM_BP_FAT	GO:0032104~regulation of response to extracellular stimulus	2	0.378788	0.0442552	NPY, CARTPT	48	13	13528	43.359	0.527041
GOTERM_BP_FAT	GO:0051354~negative regulation of oxidoreductase activity	2	0.378788	0.0442552	DRD5, IGF2	48	13	13528	43.359	0.527041
GOTERM_BP_FAT	GO:0048665~neuron fate specification	2	0.378788	0.0508913	FOXA1, TLX3	48	15	13528	37.5778	0.549565
GOTERM_BP_FAT	GO:0042445~hormone metabolic process	3	0.568182	0.0523336	FOXA1, RELN, SRD5A2	48	106	13528	7.97642	0.553036
GOTERM_BP_FAT	GO:0051347~positive regulation of transferase activity	4	0.757576	0.0505187	CARTPT, ADRA2C, IGF2, RELN	48	240	13528	4.69722	0.553836
SP_PIR_KEYWORDS	Secreted	9	1.70455	0.0977324	NPY, SMOC1, IL4R, CARTPT, KLK10, IGF2, RELN, CXCL6, SPON1	55	1689	19235	1.86356	0.560779
SP_PIR_KEYWORDS	thiolester bond	2	0.378788	0.0963383	SSTR1, DRD5	55	36	19235	19.4293	0.577283
SP_PIR_KEYWORDS	neuropeptide	2	0.378788	0.0937896	NPY, CARTPT	55	35	19235	19.9844	0.590541
GOTERM_BP_FAT	GO:0007212~dopamine receptor signaling pathway	2	0.378788	0.060761	DRD5, D4S234E	48	18	13528	31.3148	0.60216
UP_SEQ_FEATURE	compositionally biased region:Arg-rich (basic)	2	0.378788	0.0112543	ADRA2C, RELN	55	4	19113	173.755	0.607661
GOTERM_BP_FAT	GO:0048265~response to pain	2	0.378788	0.0672849	TRPA1, RELN	48	20	13528	28.1833	0.634165
GOTERM_BP_FAT	GO:0016477~cell migration	4	0.757576	0.0706711	BARHL2, RELN, TLX3, ISL1	48	276	13528	4.08454	0.639748
GOTERM_BP_FAT	GO:0002064~epithelial cell development	2	0.378788	0.0705302	FOXA1, ONECUT2	48	21	13528	26.8413	0.645496
UP_SEQ_FEATURE	domain:Reelin	2	0.378788	0.00845242	RELN, SPON1	55	3	19113	231.673	0.650955
GOTERM_BP_FAT	GO:0010604~positive regulation of macromolecule metabolic process	7	1.32576	0.0747039	FOXA1, BARHL2, ONECUT2, VGLL2, IGF2, ISL1, MAPRE3	48	857	13528	2.30202	0.654542
GOTERM_BP_FAT	GO:0042325~regulation of phosphorylation	5	0.94697	0.0776963	DRD5, CARTPT, ADRA2C, IGF2, RELN	48	466	13528	3.02396	0.657102
GOTERM_BP_FAT	GO:0019725~cellular homeostasis	5	0.94697	0.0776963	DRD5, GPR6, CARTPT, KCNQ1, PRKCB	48	466	13528	3.02396	0.657102
GOTERM_BP_FAT	GO:0045777~positive regulation of blood pressure	2	0.378788	0.0769877	DRD5, CARTPT	48	23	13528	24.5072	0.659768
GOTERM_BP_FAT	GO:0045776~negative regulation of blood pressure	2	0.378788	0.0769877	NPY, DRD5	48	23	13528	24.5072	0.659768
KEGG_PATHWAY	hsa05200:Pathways in cancer	5	0.94697	0.0425001	RALBP1, RASSF1, TCEB2, RALGDS, PRKCB	22	328	5085	3.52342	0.669601
GOTERM_BP_FAT	GO:0045893~positive regulation of transcription, DNA-dependent	5	0.94697	0.0830367	FOXA1, ONECUT2, VGLL2, ISL1, MAPRE3	48	477	13528	2.95423	0.670495
GOTERM_BP_FAT	GO:0006816~calcium ion transport	3	0.568182	0.0871095	NPY, TRPA1, PRKCB	48	142	13528	5.95423	0.671527
GOTERM_BP_FAT	GO:0006928~cell motion	5	0.94697	0.0820523	NPY, BARHL2, RELN, TLX3, ISL1	48	475	13528	2.96667	0.671887
GOTERM_BP_FAT	GO:0051254~positive regulation of RNA metabolic process	5	0.94697	0.0850234	FOXA1, ONECUT2, VGLL2, ISL1, MAPRE3	48	481	13528	2.92966	0.67368
UP_SEQ_FEATURE	region of interest:A	2	0.378788	0.0223842	SYN2, IGF2	55	8	19113	86.8773	0.674656
GOTERM_BP_FAT	GO:0019220~regulation of phosphate metabolic process	5	0.94697	0.0870337	DRD5, CARTPT, ADRA2C, IGF2, RELN	48	485	13528	2.9055	0.676859
GOTERM_BP_FAT	GO:0051174~regulation of phosphorus metabolic process	5	0.94697	0.0870337	DRD5, CARTPT, ADRA2C, IGF2, RELN	48	485	13528	2.9055	0.676859
GOTERM_BP_FAT	GO:0048870~cell motility	4	0.757576	0.0905084	BARHL2, RELN, TLX3, ISL1	48	307	13528	3.6721	0.680599
GOTERM_BP_FAT	GO:0051674~localization of cell	4	0.757576	0.0905084	BARHL2, RELN, TLX3, ISL1	48	307	13528	3.6721	0.680599
GOTERM_CC_FAT	GO:0031226~intrinsic to plasma membrane	9	1.70455	0.0241412	PTGER2, SSTR1, IL4R, DRD5, TRPA1, GPR6, ADRA2C, KCNQ1, HTR1E	39	1215	12782	2.42773	0.694318
GOTERM_BP_FAT	GO:0010817~regulation of hormone levels	3	0.568182	0.096659	FOXA1, RELN, SRD5A2	48	151	13528	5.59934	0.700215
BIOCARTA	h_rasPathway:Ras Signaling Pathway	2	0.378788	0.0807908	RALBP1, RALGDS	7	20	1437	20.5286	0.717372
UP_SEQ_FEATURE	disulfide bond	15	2.84091	0.0222246	GPR83, PTGER2, DRD5, IGF2, NPR3, CXCL6, SSTR1, SMOC1, IL4R, CARTPT, ADRA2C, KLK10, RELN, SPON1, HTR1E	55	2819	19113	1.84911	0.751787
GOTERM_CC_FAT	GO:0044421~extracellular region part	7	1.32576	0.062004	NPY, SMOC1, CARTPT, IGF2, RELN, CXCL6, SPON1	39	960	12782	2.3898	0.788225
GOTERM_CC_FAT	GO:0044459~plasma membrane part	12	2.27273	0.0511203	PTGER2, PKP2, SSTR1, SYT10, IL4R, DRD5, SYN2, TRPA1, GPR6, ADRA2C, KCNQ1, HTR1E	39	2203	12782	1.78526	0.816701
GOTERM_MF_FAT	GO:0005083~small GTPase regulator activity	4	0.757576	0.0803876	RALBP1, DOCK9, MAPRE3, RALGDS	49	274	12983	3.86802	0.827931
GOTERM_MF_FAT	GO:0003677~DNA binding	14	2.65152	0.0766852	IRX2, ONECUT2, BARHL2, FOXA1, NEUROG1, HMG20B, ISL1, ZNF177, MSX2, OLIG3, BNC1, IRF8, FOXB1, TLX3	49	2331	12983	1.59135	0.852635
GOTERM_MF_FAT	GO:0001653~peptide receptor activity	3	0.568182	0.0663899	GPR83, SSTR1, NPR3	49	114	12983	6.97261	0.853905
GOTERM_MF_FAT	GO:0008528~peptide receptor activity, G-protein coupled	3	0.568182	0.0663899	GPR83, SSTR1, NPR3	49	114	12983	6.97261	0.853905
GOTERM_CC_FAT	GO:0005887~integral to plasma membrane	9	1.70455	0.0213797	PTGER2, SSTR1, IL4R, DRD5, TRPA1, GPR6, ADRA2C, KCNQ1, HTR1E	39	1188	12782	2.48291	0.877092
GOTERM_MF_FAT	GO:0005246~calcium channel regulator activity	2	0.378788	0.0610629	NPY, PRKCB	49	17	12983	31.1717	0.879611
UP_SEQ_FEATURE	lipid moiety-binding region:S-palmitoyl cysteine	3	0.568182	0.0927395	SSTR1, DRD5, GPR6	55	181	19113	5.75982	0.931564
UP_SEQ_FEATURE	domain:Ras-associating	2	0.378788	0.0917899	RASSF1, RALGDS	55	34	19113	20.4417	0.949444
UP_SEQ_FEATURE	metal ion-binding site:Calcium 1; via carbonyl oxygen	2	0.378788	0.0866273	SYT10, PRKCB	55	32	19113	21.7193	0.959653
UP_SEQ_FEATURE	metal ion-binding site:Calcium 3	2	0.378788	0.0814359	SYT10, PRKCB	55	30	19113	23.1673	0.970133
