# Supplementary material for: Integrative Subtype Discovery in Glioblastoma Using iCluster
Source: PLoS One. 2012 Apr 23;7(4):e35236. doi: 10.1371/journal.pone.0035236 (PMC3335101; doi:10.1371/journal.pone.0035236)
Supplement: Table S2 — Selected expression features and functional annotations using DAVID. (XLSX) [file pone.0035236.s006.xlsx]

## Sheet: expression features
Gene Name	Gene Cluster	mean in iCluster 1	mean in iCluster 2	mean in iCluster 3	adj.P.Val
JMJD1C	1	1.31416	0.214001	0.00291227	2.27808e-07
ALCAM	1	1.29197	-0.548497	0.183333	2.10745e-06
KIAA1166	1	0.917076	-0.204808	0.00392182	6.68128e-06
PHC1	1	0.58533	0.258575	-0.303738	1.17264e-05
ENAH	1	0.665637	0.254796	-0.31464	1.58488e-05
PLCB1	1	0.839132	0.007041	-0.146424	5.55292e-05
MAPT	1	0.66653	0.137282	-0.49249	8.82471e-05
NOTCH1	1	0.665554	0.401573	-0.459944	0.000184088
ZNF22	1	0.790522	0.357735	-0.222305	0.000234373
CLASP2	1	0.841876	-0.0010525	-0.213639	0.000314035
PAFAH1B3	1	0.49839	0.303945	-0.475936	0.000380564
HIST1H4C	1	0.485325	-0.256034	-0.840101	0.000380564
PPA1	1	0.662184	-0.208033	0.133241	0.000516507
ZNF711	1	1.00364	0.492654	-0.340675	0.000518169
KLHL23	1	0.975431	0.199038	-0.358586	0.000705848
TCF12	1	0.727706	0.196871	-0.303729	0.00115184
TMEM97	1	0.510906	0.158139	-0.385643	0.00196105
ZNF292	1	0.660192	0.252814	-0.156065	0.00371827
GSTA4	1	0.797879	0.060702	-0.255546	0.00392429
ZNF184	1	0.507441	0.0995145	-0.313694	0.0058754
APBA2	1	0.61624	0.207653	-0.229218	0.00607603
TOP2B	1	0.673302	0.101458	-0.197546	0.00663597
MYH10	1	0.498987	0.15046	-0.30172	0.00683116
KCNQ2	1	0.368902	0.29592	-0.285071	0.00698123
ZMYM2	1	0.789686	0.260827	-0.086875	0.00895902
CCNB1IP1	1	0.444476	0.308956	-0.315369	0.00916673
TBPL1	1	0.530678	-0.334157	-0.0140732	0.011024
ZFP37	1	0.897529	0.389217	-0.126333	0.016965
PARP2	1	0.333072	0.277133	-0.247977	0.043126
CISD1	1	0.432112	-0.295808	0.0491164	0.066097
CADM3	1	0.427384	-0.404948	0.373425	0.0690529
CACNA1A	1	0.349653	-0.103508	0.102021	0.299743
ARNTL	2	-1.07642	0.544519	-0.154612	8.21735e-08
DPY19L1	2	-0.771273	0.504582	0.0239941	7.62921e-07
SLC35F2	2	-0.721038	0.492068	0.119877	1.67925e-06
CNGA3	2	-0.999865	0.910076	-0.308631	3.87156e-06
LRRC16	2	-1.24983	0.674311	0.00340136	4.10947e-06
PDGFA	2	-1.09452	0.827722	-0.315962	1.0138e-05
SIPA1L1	2	-0.791161	0.471335	0.0950586	1.05377e-05
DENND2A	2	-0.365072	0.805062	-0.231388	1.56876e-05
GRIK1	2	-1.22474	1.0174	-0.04609	1.84816e-05
ALDH7A1	2	-0.795712	0.63088	0.0385786	3.95819e-05
LAMB2	2	-0.588872	0.443103	0.174936	0.000284882
ZNF177	2	0.276206	0.597933	-0.528155	0.000333048
SEMA6A	2	-0.0377631	0.735476	-0.393016	0.000358585
ZFP2	2	0.34865	0.449445	-0.2775	0.000583641
ZNF43	2	0.283002	0.588764	-0.287189	0.000847303
PSRC1	2	-0.735998	0.397599	-0.06936	0.00108345
TRIM9	2	0.112041	0.631069	-0.35724	0.00124648
CENTD1	2	-0.684651	0.676122	0.10666	0.00146148
HS3ST3B1	2	-1.05325	0.480805	0.0290409	0.00175136
CDH2	2	-0.295327	0.521572	-0.193773	0.00231182
ZNF573	2	0.211531	0.570664	-0.167342	0.00235766
FZD3	2	0.132305	0.788048	-0.246126	0.00271346
GPR56	2	0.322428	0.520865	-0.339827	0.00283019
ZNF228	2	0.0910746	0.645965	-0.311064	0.00360441
DZIP1	2	0.389311	0.570239	-0.215818	0.00392429
EYA2	2	-0.618184	0.886888	-0.0472564	0.00495899
PLEKHC1	2	-0.390857	0.547628	-0.0722795	0.00545036
SYNE2	2	0.302225	0.436754	-0.322231	0.00670591
MID1	2	-0.335255	0.641092	0.00173591	0.00673656
SATB2	2	-0.0616215	0.64172	-0.246979	0.00736918
DTNA	2	-0.346439	0.63323	-0.0246973	0.008108
FOXG1	2	-0.44808	0.932082	-0.235588	0.0101303
MLC1	2	-0.655393	0.680713	-0.0177109	0.0109568
APC	2	0.16404	0.37369	-0.311966	0.0115212
SGEF	2	-0.268765	0.700691	-0.178174	0.0115212
JAKMIP2	2	-0.0313308	0.20754	-0.482624	0.0119729
LHFP	2	-0.208678	0.724417	0.0127455	0.0119729
HES1	2	-0.642792	0.492988	0.04431	0.0152926
SPATA6	2	-0.256385	0.554619	-0.157787	0.0188115
ALK	2	-0.578717	0.467321	0.0992123	0.022155
PRKD1	2	0.308538	0.459608	-0.247283	0.0295911
NES	2	-0.0315577	0.547339	-0.354606	0.0313938
ITGB8	2	-0.384505	0.394979	-0.0652182	0.0383921
SLC1A3	2	-0.653915	0.241281	0.00848273	0.0395939
SLC24A3	2	0.248515	0.431238	-0.259685	0.0412996
B3GALT1	2	-0.239394	0.658645	-0.223285	0.043126
MAB21L1	2	-0.479891	0.518854	-0.0892691	0.0436076
IDH1	2	-0.289212	0.346902	-0.0672759	0.0479992
SEMA6D	2	-0.149433	0.585869	-0.115189	0.0539687
JAG1	2	-0.256959	0.453796	-0.128657	0.0539687
AASS	2	-0.162462	0.607448	-0.0867991	0.060307
FBXO3	2	-0.388276	0.402016	-0.0265045	0.0623617
TRPM3	2	-0.450385	0.342867	0.0371768	0.0623617
ADAMTS9	2	-0.564345	0.635185	0.0837364	0.0623617
SALL1	2	0.240138	0.391958	-0.3817	0.0692946
TLE1	2	-0.166908	0.478833	-0.185855	0.0692946
F2R	2	0.111447	0.567327	-0.0736123	0.0692946
FLJ13195	2	-0.502901	0.104094	-0.0346109	0.0703449
GATM	2	-0.482797	0.646596	0.00328273	0.0703449
MYO5C	2	-0.660062	0.39759	-0.184847	0.0703449
FGFR3	2	-0.531604	0.437229	-0.20125	0.0703449
ARNT2	2	0.139429	0.177465	-0.443879	0.0787512
ACTN2	2	-0.0378185	0.462216	-0.112993	0.115498
ZNF83	2	0.115817	0.737422	0.237853	0.118601
PITPNC1	2	-0.00965154	0.356905	-0.220733	0.118601
KIAA0423	2	0.119108	0.433076	0.0142827	0.171633
PILRB	2	-0.100062	0.533466	0.202014	0.171633
ACSL3	2	-0.236355	0.520662	0.0641914	0.171633
SSFA2	2	-0.311893	0.343781	0.202895	0.171633
HIP1	2	0.133999	0.369542	-0.0904577	0.181412
SLC20A2	2	-0.114498	0.426291	-0.0304773	0.21961
PAX6	2	-0.317913	0.310966	-0.197975	0.225766
PRMT3	2	-0.0848162	0.343851	0.0566727	0.288021
RASSF2	2	-0.167151	0.322394	-0.0395264	0.288021
MYO6	2	0.177031	0.486706	0.0264741	0.288021
JAM2	2	-0.170993	0.168869	-0.00287136	0.300337
ALDH6A1	2	-0.0920285	0.22498	-0.197592	0.300337
PGCP	3	-1.27826	0.308404	0.646456	5.57543e-12
TRIP6	3	-1.1881	0.29753	0.302955	2.00753e-10
TTC12	3	-1.09482	0.20504	0.342693	1.40197e-09
EHD2	3	-0.704755	0.436885	0.133637	1.37813e-07
IQGAP1	3	-0.934877	0.297012	0.437255	1.91233e-07
IL13RA1	3	-0.994962	0.020059	0.631249	2.71073e-07
HSPB1	3	-1.08684	0.01342	0.452976	2.81745e-07
F11R	3	-0.80305	0.302691	0.454739	3.52871e-07
M6PRBP1	3	-0.792113	0.249427	0.287073	3.66363e-07
CAPG	3	-1.12568	-0.064247	0.584171	3.75285e-07
LGALS1	3	-0.865694	0.233931	0.55099	9.93491e-07
TGFB3	3	-0.746512	0.492947	0.233961	1.56228e-06
C9orf95	3	-0.802972	0.0484325	0.804805	1.98824e-06
ENPP4	3	0.753561	-0.796998	0.959245	2.52975e-06
TWSG1	3	-0.619622	0.406471	0.249909	5.38615e-06
CALU	3	-0.567341	0.355633	0.512766	5.85562e-06
FER1L3	3	-0.964287	0.189376	0.56948	7.70558e-06
CAST	3	-0.754945	0.238613	0.412783	7.7331e-06
HLA-E	3	-0.913595	0.096003	0.419615	7.8248e-06
SLC39A8	3	-0.786198	0.159588	0.604	8.8928e-06
HEXB	3	-0.720588	0.175892	0.52121	1.58488e-05
SAT1	3	-0.672365	0.0113675	0.704935	1.77573e-05
FCGR2A	3	-0.699896	-0.0357705	0.865189	2.17048e-05
TLR2	3	-0.705274	-0.0598455	0.836409	2.63716e-05
ARPC1B	3	-0.785295	-0.045668	0.794099	3.17109e-05
ITGB2	3	-0.588945	-0.171345	0.747289	4.60006e-05
SLA	3	-0.556062	-0.0118085	0.77404	6.30143e-05
CD164	3	-0.390512	0.28544	0.426427	7.75797e-05
FAH	3	-0.616573	-0.0268135	0.471302	9.14074e-05
ADAM12	3	-0.795869	0.37012	0.578098	9.39525e-05
SLC11A1	3	-0.529984	0.030807	0.694875	0.000116246
LAIR1	3	-0.606258	-0.109519	0.794759	0.000143771
MYO1E	3	-0.70975	0.122021	0.379397	0.000151915
CD74	3	-0.529747	-0.001235	0.91106	0.000171742
RRAS	3	-0.672063	-0.058299	0.430899	0.000196352
BLVRB	3	-0.897673	0.041465	0.371377	0.00020215
CD97	3	-0.749502	0.433571	0.208783	0.000213548
CTSZ	3	-0.566271	-0.137977	0.41824	0.000224814
SLC7A7	3	-0.603237	-0.19155	0.680013	0.000237828
SYK	3	-0.519193	-0.345187	0.654468	0.000244226
CTSA	3	-0.400145	0.30587	0.380533	0.000268703
GIMAP4	3	-0.567155	-0.297915	0.657779	0.000284882
PIGB	3	-0.516457	0.155736	0.270089	0.000455188
TGFBR2	3	-0.485443	-0.0815105	0.458496	0.000455538
LIMS1	3	-0.561765	0.05156	0.463145	0.000484379
MFSD1	3	-0.388569	0.0301665	0.527979	0.000484379
PROCR	3	-0.552535	-0.191312	0.453498	0.000516507
TBXAS1	3	-0.334105	-0.15523	0.698157	0.000587161
CLIC2	3	-0.0226392	-0.280656	0.716275	0.000589271
IGFBP7	3	-0.687758	-0.190917	0.252285	0.000705888
CTSB	3	-0.615235	0.0389305	0.66851	0.00074253
MYO1F	3	-0.31409	-0.0181505	0.566014	0.000899532
OSTF1	3	-0.362355	0.189374	0.857287	0.000938803
CYBA	3	-0.455636	-0.0409655	0.705506	0.00103736
HLA-DPA1	3	-0.395475	-0.155245	0.722565	0.00103736
RBMS1	3	-0.456398	0.335848	0.574059	0.00108345
CCL5	3	-0.436011	-0.176701	0.714918	0.00114066
FXYD5	3	-0.44479	-0.083556	0.571175	0.00115313
FPR1	3	-0.493458	-0.0114225	0.524283	0.00120156
SLC15A3	3	-0.433783	0.0540775	0.726511	0.00124857
EPB41L3	3	-0.0398331	-0.553724	0.831853	0.00142046
CD37	3	-0.309464	-0.07986	0.793469	0.00157301
PLEKHA4	3	-0.398519	0.406779	0.189441	0.00157301
TES	3	-0.492838	-0.085804	0.71992	0.00171877
ITGAM	3	-0.357322	-0.071629	0.527731	0.00175136
SHC1	3	-0.337517	-0.069064	0.501386	0.00175136
C20orf23	3	-0.540908	0.120136	0.384467	0.00192436
LGALS3BP	3	-0.477997	0.258656	0.348517	0.00196105
HLA-F	3	-0.633165	0.115207	0.415504	0.00200511
IL4R	3	-0.427012	-0.153	0.579149	0.00250706
GIMAP5	3	-0.305024	-0.277908	0.620895	0.00303945
TNFRSF1B	3	-0.371011	-0.111431	0.499567	0.00360441
TPP1	3	-0.559742	0.131792	0.472393	0.00367022
SLC16A3	3	-0.582922	0.091688	0.445425	0.00392429
CDCP1	3	-0.645604	-0.210699	0.32595	0.00392429
CSF1R	3	-0.442687	-0.267463	0.596677	0.00442475
REXO2	3	-0.516834	0.103912	0.381506	0.00442475
SOAT1	3	-0.461513	0.113725	0.36803	0.00663597
ARHGDIB	3	-0.488412	-0.276379	0.469509	0.00673656
MOSPD2	3	-0.274487	0.197917	0.398802	0.00673656
GGTLA1	3	-0.384914	0.147211	0.507963	0.00745205
LIMK2	3	-0.347322	0.223644	0.381445	0.008108
B4GALT5	3	-0.217205	0.502165	0.0396191	0.00959601
ITGA5	3	-0.570751	0.121081	0.491102	0.0101052
RABGAP1L	3	-0.243549	-0.143502	0.477276	0.0105195
BDKRB2	3	-0.494692	-0.0997295	0.462386	0.0105195
IL32	3	-0.367443	0.092951	0.434311	0.0115212
RAC2	3	-0.410442	-0.139525	0.452158	0.0119576
GRN	3	-0.273985	0.101484	0.46589	0.0119729
MAN2B1	3	-0.352664	0.064507	0.511888	0.0135697
FLNB	3	0.273042	-0.203484	0.419698	0.0135697
PLOD3	3	-0.46408	0.128312	0.173038	0.0153276
SCPEP1	3	-0.317995	-0.131154	0.566892	0.0175519
TXNIP	3	0.224646	-0.225856	0.546279	0.0213078
CORO1A	3	-0.278112	-0.141092	0.41837	0.0257029
SSR3	3	-0.255059	0.194576	0.391973	0.0290459
KIAA0247	3	-0.273476	0.165609	0.336157	0.0290459
MYH9	3	-0.456832	0.154029	0.529429	0.0309167
BTN3A3	3	-0.302152	0.166409	0.474629	0.0313938
ARHGAP28	3	0.292062	-0.375866	0.339142	0.031561
PLXND1	3	-0.341571	0.143432	0.425783	0.036889
GNS	3	-0.18949	0.31297	0.403773	0.0425646
SELPLG	3	-0.155131	-0.150474	0.423113	0.0481188
PLAGL1	3	-0.410431	0.151177	0.315488	0.0539687
UAP1	3	-0.105484	-0.0561025	0.453359	0.0539687
GALNT2	3	-0.337742	0.21307	0.174538	0.0620692
PHACTR2	3	-0.478812	0.0994395	0.30586	0.0623617
GPI	3	-0.371295	0.289762	0.110837	0.0623617
PARP8	3	0.589005	-0.110788	0.41868	0.0690529
TNS3	3	0.281031	-0.353558	0.370852	0.0690529
AXL	3	-0.321265	-0.0262385	0.326698	0.0692946
TCN2	3	-0.186617	0.12145	0.555961	0.0692946
C11orf75	3	-0.0945469	-0.303173	0.462203	0.0703449
C11orf9	3	0.269822	-0.327553	0.306929	0.0703449
SERPINB9	3	-0.233669	0.0753025	0.354115	0.0787512
AIM2	3	0.174131	-0.390381	0.395607	0.0909825
SLC16A7	3	0.766585	-0.201771	0.314935	0.0923167
IGFBP5	3	-0.263408	0.523049	-0.0859236	0.10759
UGDH	3	0.579378	-0.0970205	0.0728291	0.181412

## Sheet: DAVID gene cluster 1
Category	Term	Count	%	PValue	Genes	List Total	Pop Hits	Pop Total	Fold Enrichment	Benjamini
SP_PIR_KEYWORDS	dna-binding	11	3.7415	0.000353954	ZNF184, ZNF292, ZNF711, HIST1H4C, TOP2B, TCF12, PARP2, PHC1, ZNF22, TBPL1, ZFP37	31	1868	19235	3.65381	0.0371713
GOTERM_BP_FAT	GO:0032989~cellular component morphogenesis	7	2.38095	0.000107862	ALCAM, NOTCH1, CLASP2, TOP2B, CACNA1A, TBPL1, MYH10	28	397	13528	8.51889	0.0540372
GOTERM_BP_FAT	GO:0048812~neuron projection morphogenesis	5	1.70068	0.00078911	ALCAM, NOTCH1, TOP2B, CACNA1A, MYH10	28	213	13528	11.3414	0.0966435
SP_PIR_KEYWORDS	zinc-finger	9	3.06122	0.00390161	CCNB1IP1, ZNF184, ZNF292, ZMYM2, ZNF711, JMJD1C, PHC1, ZNF22, ZFP37	31	1718	19235	3.2505	0.0992903
GOTERM_BP_FAT	GO:0048858~cell projection morphogenesis	5	1.70068	0.0013273	ALCAM, NOTCH1, TOP2B, CACNA1A, MYH10	28	245	13528	9.86006	0.107744
GOTERM_BP_FAT	GO:0032990~cell part morphogenesis	5	1.70068	0.00156034	ALCAM, NOTCH1, TOP2B, CACNA1A, MYH10	28	256	13528	9.43638	0.108533
GOTERM_BP_FAT	GO:0031175~neuron projection development	5	1.70068	0.00156034	ALCAM, NOTCH1, TOP2B, CACNA1A, MYH10	28	256	13528	9.43638	0.108533
GOTERM_BP_FAT	GO:0048667~cell morphogenesis involved in neuron differentiation	5	1.70068	0.000735078	ALCAM, NOTCH1, TOP2B, CACNA1A, MYH10	28	209	13528	11.5584	0.118592
SP_PIR_KEYWORDS	metal-binding	12	4.08163	0.00370237	CCNB1IP1, ZNF184, ZNF292, ZMYM2, NOTCH1, CISD1, ZNF711, JMJD1C, PHC1, ZNF22, ZFP37, PPA1	31	2972	19235	2.50532	0.123918
GOTERM_BP_FAT	GO:0000904~cell morphogenesis involved in differentiation	5	1.70068	0.00130741	ALCAM, NOTCH1, TOP2B, CACNA1A, MYH10	28	244	13528	9.90047	0.126067
SP_PIR_KEYWORDS	nucleus	15	5.10204	0.00266693	CCNB1IP1, ZNF292, ZMYM2, ZNF22, ZFP37, ZNF184, NOTCH1, ZNF711, HIST1H4C, JMJD1C, TOP2B, TCF12, PARP2, PHC1, TBPL1	31	4283	19235	2.17307	0.133134
GOTERM_BP_FAT	GO:0000902~cell morphogenesis	6	2.04082	0.000614559	ALCAM, NOTCH1, CLASP2, TOP2B, CACNA1A, MYH10	28	356	13528	8.14286	0.146404
SP_PIR_KEYWORDS	Transcription	9	3.06122	0.0119198	ZNF184, ZNF292, ZMYM2, NOTCH1, ZNF711, JMJD1C, TCF12, ZNF22, ZFP37	31	2071	19235	2.69645	0.167479
GOTERM_MF_FAT	GO:0043167~ion binding	16	5.44218	0.00742101	CCNB1IP1, ZNF292, ZMYM2, CADM3, ZNF22, PPA1, ZFP37, ZNF184, NOTCH1, CISD1, ZNF711, JMJD1C, PLCB1, KCNQ2, CACNA1A, PHC1	27	4241	12983	1.81411	0.17913
SP_PIR_KEYWORDS	phosphoprotein	19	6.46259	0.0110454	CCNB1IP1, ENAH, ZNF292, ZMYM2, ZNF184, NOTCH1, MAPT, ZNF711, APBA2, HIST1H4C, CLASP2, JMJD1C, PLCB1, KCNQ2, TOP2B, TCF12, CACNA1A, PHC1, MYH10	31	7263	19235	1.62319	0.17969
SP_PIR_KEYWORDS	zinc	9	3.06122	0.016348	CCNB1IP1, ZNF184, ZNF292, ZMYM2, ZNF711, JMJD1C, PHC1, ZNF22, ZFP37	31	2189	19235	2.5511	0.197851
SP_PIR_KEYWORDS	transcription regulation	9	3.06122	0.0104952	ZNF184, ZNF292, ZMYM2, NOTCH1, ZNF711, JMJD1C, TCF12, ZNF22, ZFP37	31	2026	19235	2.75634	0.202109
GOTERM_MF_FAT	GO:0043169~cation binding	16	5.44218	0.00637081	CCNB1IP1, ZNF292, ZMYM2, CADM3, ZNF22, PPA1, ZFP37, ZNF184, NOTCH1, CISD1, ZNF711, JMJD1C, PLCB1, KCNQ2, CACNA1A, PHC1	27	4179	12983	1.84102	0.20214
GOTERM_BP_FAT	GO:0048666~neuron development	5	1.70068	0.00431008	ALCAM, NOTCH1, TOP2B, CACNA1A, MYH10	28	339	13528	7.126	0.24275
GOTERM_MF_FAT	GO:0046872~metal ion binding	16	5.44218	0.00577687	CCNB1IP1, ZNF292, ZMYM2, CADM3, ZNF22, PPA1, ZFP37, ZNF184, NOTCH1, CISD1, ZNF711, JMJD1C, PLCB1, KCNQ2, CACNA1A, PHC1	27	4140	12983	1.85836	0.264395
GOTERM_BP_FAT	GO:0030030~cell projection organization	5	1.70068	0.00576158	ALCAM, NOTCH1, TOP2B, CACNA1A, MYH10	28	368	13528	6.56444	0.281539
GOTERM_BP_FAT	GO:0007409~axonogenesis	4	1.36054	0.00649922	ALCAM, NOTCH1, TOP2B, MYH10	28	193	13528	10.0133	0.285236
GOTERM_MF_FAT	GO:0003677~DNA binding	12	4.08163	0.0033267	ZNF184, ZNF292, NOTCH1, ZNF711, HIST1H4C, TOP2B, TCF12, PARP2, PHC1, ZNF22, TBPL1, ZFP37	27	2331	12983	2.47543	0.297576
GOTERM_CC_FAT	GO:0043025~cell soma	3	1.02041	0.0306193	ALCAM, CACNA1A, MYH10	22	168	12782	10.375	0.30668
GOTERM_CC_FAT	GO:0030424~axon	3	1.02041	0.0276602	ALCAM, MAPT, MYH10	22	159	12782	10.9623	0.310413
GOTERM_CC_FAT	GO:0042995~cell projection	5	1.70068	0.0249872	ALCAM, ENAH, MAPT, CACNA1A, MYH10	22	697	12782	4.16786	0.318313
GOTERM_CC_FAT	GO:0031974~membrane-enclosed lumen	8	2.72109	0.0243218	ZMYM2, HIST1H4C, TOP2B, TCF12, PARP2, PHC1, ZNF22, TBPL1	22	1856	12782	2.50431	0.352733
GOTERM_CC_FAT	GO:0043233~organelle lumen	8	2.72109	0.0220208	ZMYM2, HIST1H4C, TOP2B, TCF12, PARP2, PHC1, ZNF22, TBPL1	22	1820	12782	2.55385	0.376283
GOTERM_BP_FAT	GO:0030182~neuron differentiation	5	1.70068	0.0105393	ALCAM, NOTCH1, TOP2B, CACNA1A, MYH10	28	438	13528	5.51533	0.391068
GOTERM_CC_FAT	GO:0043228~non-membrane-bounded organelle	9	3.06122	0.0465662	ENAH, MAPT, HIST1H4C, CLASP2, TOP2B, PARP2, PHC1, ZNF22, MYH10	22	2596	12782	2.01425	0.396774
GOTERM_CC_FAT	GO:0043232~intracellular non-membrane-bounded organelle	9	3.06122	0.0465662	ENAH, MAPT, HIST1H4C, CLASP2, TOP2B, PARP2, PHC1, ZNF22, MYH10	22	2596	12782	2.01425	0.396774
GOTERM_CC_FAT	GO:0070013~intracellular organelle lumen	8	2.72109	0.0195969	ZMYM2, HIST1H4C, TOP2B, TCF12, PARP2, PHC1, ZNF22, TBPL1	22	1779	12782	2.6127	0.408133
SP_PIR_KEYWORDS	acetylation	9	3.06122	0.0443522	ZNF292, CISD1, MAPT, HIST1H4C, JMJD1C, PLCB1, TOP2B, MYH10, PPA1	31	2635	19235	2.1193	0.416873
GOTERM_CC_FAT	GO:0043005~neuron projection	4	1.36054	0.0176646	ALCAM, MAPT, CACNA1A, MYH10	22	342	12782	6.79532	0.467263
GOTERM_CC_FAT	GO:0005654~nucleoplasm	6	2.04082	0.012434	ZMYM2, HIST1H4C, TOP2B, TCF12, PARP2, TBPL1	22	882	12782	3.95238	0.484766
GOTERM_CC_FAT	GO:0031981~nuclear lumen	8	2.72109	0.00658263	ZMYM2, HIST1H4C, TOP2B, TCF12, PARP2, PHC1, ZNF22, TBPL1	22	1450	12782	3.20552	0.503447
GOTERM_BP_FAT	GO:0006350~transcription	10	3.40136	0.0170691	ZNF184, ZNF292, ZMYM2, NOTCH1, ZNF711, JMJD1C, TCF12, ZNF22, TBPL1, ZFP37	28	2101	13528	2.29959	0.522348
GOTERM_BP_FAT	GO:0021680~cerebellar Purkinje cell layer development	2	0.680272	0.0197868	CACNA1A, MYH10	28	10	13528	96.6286	0.546936
GOTERM_CC_FAT	GO:0030427~site of polarized growth	2	0.680272	0.0866421	MAPT, MYH10	22	55	12782	21.1273	0.550915
GOTERM_CC_FAT	GO:0030426~growth cone	2	0.680272	0.0851327	MAPT, MYH10	22	54	12782	21.5185	0.575739
UP_SEQ_FEATURE	zinc finger region:C2H2-type 8	4	1.36054	0.027074	ZNF184, ZNF292, ZNF711, ZFP37	31	417	19113	5.91413	0.631108
GOTERM_BP_FAT	GO:0045664~regulation of neuron differentiation	3	1.02041	0.0286825	NOTCH1, MAPT, CACNA1A	28	133	13528	10.898	0.631813
GOTERM_BP_FAT	GO:0030900~forebrain development	3	1.02041	0.0366426	NOTCH1, TOP2B, MYH10	28	152	13528	9.53571	0.636458
GOTERM_BP_FAT	GO:0031114~regulation of microtubule depolymerization	2	0.680272	0.0314774	MAPT, CLASP2	28	16	13528	60.3929	0.642803
GOTERM_BP_FAT	GO:0007026~negative regulation of microtubule depolymerization	2	0.680272	0.0314774	MAPT, CLASP2	28	16	13528	60.3929	0.642803
GOTERM_BP_FAT	GO:0031111~negative regulation of microtubule polymerization or depolymerization	2	0.680272	0.0334127	MAPT, CLASP2	28	17	13528	56.8403	0.642816
GOTERM_BP_FAT	GO:0021695~cerebellar cortex development	2	0.680272	0.0353443	CACNA1A, MYH10	28	18	13528	53.6825	0.64283
UP_SEQ_FEATURE	compositionally biased region:Poly-Gln	3	1.02041	0.0233391	NOTCH1, PHC1, CACNA1A	31	151	19113	12.2493	0.642868
GOTERM_BP_FAT	GO:0022604~regulation of cell morphogenesis	3	1.02041	0.0278909	MAPT, CACNA1A, MYH10	28	131	13528	11.0643	0.646745
UP_SEQ_FEATURE	zinc finger region:C2H2-type 7	4	1.36054	0.0330744	ZNF184, ZNF292, ZNF711, ZFP37	31	451	19113	5.46828	0.649169
UP_SEQ_FEATURE	zinc finger region:C2H2-type 2	5	1.70068	0.014413	ZNF184, ZNF292, ZNF711, ZNF22, ZFP37	31	608	19113	5.0703	0.651797
SP_PIR_KEYWORDS	DNA binding	3	1.02041	0.0980765	HIST1H4C, TCF12, ZNF22	31	340	19235	5.47486	0.668628
UP_SEQ_FEATURE	zinc finger region:C2H2-type 6	4	1.36054	0.0403356	ZNF184, ZNF292, ZNF711, ZFP37	31	488	19113	5.05368	0.674348
GOTERM_BP_FAT	GO:0050767~regulation of neurogenesis	3	1.02041	0.0429916	NOTCH1, MAPT, CACNA1A	28	166	13528	8.7315	0.677462
UP_SEQ_FEATURE	zinc finger region:C2H2-type 9	4	1.36054	0.0207008	ZNF184, ZNF292, ZNF711, ZFP37	31	376	19113	6.55903	0.680192
GOTERM_MF_FAT	GO:0046914~transition metal ion binding	10	3.40136	0.0858463	CCNB1IP1, ZNF184, ZNF292, ZMYM2, CISD1, ZNF711, JMJD1C, PHC1, ZNF22, ZFP37	27	2785	12983	1.72658	0.695558
UP_SEQ_FEATURE	zinc finger region:C2H2-type 5	4	1.36054	0.0513367	ZNF184, ZNF292, ZNF22, ZFP37	31	538	19113	4.584	0.721
GOTERM_BP_FAT	GO:0031110~regulation of microtubule polymerization or depolymerization	2	0.680272	0.0601193	MAPT, CLASP2	28	31	13528	31.1705	0.721197
GOTERM_BP_FAT	GO:0010927~cellular component assembly involved in morphogenesis	2	0.680272	0.0694841	TBPL1, MYH10	28	36	13528	26.8413	0.721658
GOTERM_BP_FAT	GO:0060284~regulation of cell development	3	1.02041	0.0626175	NOTCH1, MAPT, CACNA1A	28	205	13528	7.07038	0.722196
GOTERM_BP_FAT	GO:0022037~metencephalon development	2	0.680272	0.0676183	CACNA1A, MYH10	28	35	13528	27.6082	0.724106
GOTERM_BP_FAT	GO:0050885~neuromuscular process controlling balance	2	0.680272	0.0676183	CACNA1A, MYH10	28	35	13528	27.6082	0.724106
GOTERM_BP_FAT	GO:0040007~growth	3	1.02041	0.0512124	NOTCH1, APBA2, CACNA1A	28	183	13528	7.92037	0.724516
UP_SEQ_FEATURE	zinc finger region:C2H2-type 4	5	1.70068	0.0119429	ZNF184, ZNF292, ZNF711, ZNF22, ZFP37	31	575	19113	5.36129	0.730074
GOTERM_BP_FAT	GO:0045449~regulation of transcription	10	3.40136	0.0594296	ZNF184, ZNF292, ZMYM2, NOTCH1, ZNF711, JMJD1C, TCF12, ZNF22, TBPL1, ZFP37	28	2601	13528	1.85753	0.731452
GOTERM_BP_FAT	GO:0006928~cell motion	4	1.36054	0.0674921	ALCAM, CLASP2, TOP2B, MYH10	28	475	13528	4.06857	0.736276
GOTERM_BP_FAT	GO:0021549~cerebellum development	2	0.680272	0.0582355	CACNA1A, MYH10	28	30	13528	32.2095	0.739064
GOTERM_BP_FAT	GO:0051960~regulation of nervous system development	3	1.02041	0.0557779	NOTCH1, MAPT, CACNA1A	28	192	13528	7.54911	0.739079
GOTERM_MF_FAT	GO:0019899~enzyme binding	4	1.36054	0.0851918	ZMYM2, MAPT, PLCB1, TOP2B	27	523	12983	3.67764	0.740327
INTERPRO	IPR010507:Zinc finger, MYM-type	2	0.680272	0.0125401	ZMYM2, PHC1	31	7	16659	153.539	0.750461
GOTERM_BP_FAT	GO:0070507~regulation of microtubule cytoskeleton organization	2	0.680272	0.0806032	MAPT, CLASP2	28	42	13528	23.0068	0.752441
GOTERM_BP_FAT	GO:0043242~negative regulation of protein complex disassembly	2	0.680272	0.0787589	MAPT, CLASP2	28	41	13528	23.5679	0.755427
GOTERM_MF_FAT	GO:0008092~cytoskeletal protein binding	4	1.36054	0.0781343	ENAH, MAPT, CLASP2, MYH10	27	504	12983	3.81628	0.762428
GOTERM_BP_FAT	GO:0032886~regulation of microtubule-based process	2	0.680272	0.0934138	MAPT, CLASP2	28	49	13528	19.7201	0.793675
UP_SEQ_FEATURE	zinc finger region:C2H2-type 11	3	1.02041	0.0769423	ZNF184, ZNF711, ZFP37	31	293	19113	6.31278	0.795403
GOTERM_BP_FAT	GO:0043244~regulation of protein complex disassembly	2	0.680272	0.0970423	MAPT, CLASP2	28	51	13528	18.9468	0.796697
INTERPRO	IPR013162:CD80-like, immunoglobulin C2-set	2	0.680272	0.0578004	ALCAM, CADM3	31	33	16659	32.5689	0.805495
UP_SEQ_FEATURE	zinc finger region:C2H2-type 3	4	1.36054	0.0727673	ZNF184, ZNF292, ZNF711, ZNF22	31	622	19113	3.96494	0.807374
GOTERM_MF_FAT	GO:0008270~zinc ion binding	9	3.06122	0.0765341	CCNB1IP1, ZNF184, ZNF292, ZMYM2, ZNF711, JMJD1C, PHC1, ZNF22, ZFP37	27	2311	12983	1.87264	0.815106
UP_SEQ_FEATURE	zinc finger region:C2H2-type 10	3	1.02041	0.0962035	ZNF184, ZNF711, ZFP37	31	334	19113	5.53786	0.840797
INTERPRO	IPR015880:Zinc finger, C2H2-like	5	1.70068	0.053092	ZNF184, ZNF292, ZNF711, ZNF22, ZFP37	31	797	16659	3.37131	0.864704
UP_SEQ_FEATURE	zinc finger region:C2H2-type 1	5	1.70068	0.00976576	ZNF184, ZNF292, ZNF711, ZNF22, ZFP37	31	542	19113	5.68772	0.882275
INTERPRO	IPR013087:Zinc finger, C2H2-type/integrase, DNA-binding	4	1.36054	0.0996466	ZNF184, ZNF711, ZNF22, ZFP37	31	621	16659	3.46143	0.900669
INTERPRO	IPR007087:Zinc finger, C2H2-type	5	1.70068	0.050512	ZNF184, ZNF292, ZNF711, ZNF22, ZFP37	31	784	16659	3.42721	0.942201
SMART	SM00355:ZnF_C2H2	5	1.70068	0.0923119	ZNF184, ZNF292, ZNF711, ZNF22, ZFP37	21	797	9079	2.71225	0.945286

## Sheet: DAVID gene cluster 2
Category	Term	Count	%	PValue	Genes	List Total	Pop Hits	Pop Total	Fold Enrichment	Benjamini
GOTERM_BP_FAT	GO:0007423~sensory organ development	9	1.24309	8.11525e-06	HES1, MYO6, PDGFA, FOXG1, PAX6, FZD3, JAG1, MAB21L1, APC	62	229	13528	8.57529	0.00755102
GOTERM_BP_FAT	GO:0048839~inner ear development	6	0.828729	2.75266e-05	HES1, MYO6, PDGFA, FOXG1, FZD3, JAG1	62	79	13528	16.5717	0.0127728
GOTERM_BP_FAT	GO:0043583~ear development	6	0.828729	6.69708e-05	HES1, MYO6, PDGFA, FOXG1, FZD3, JAG1	62	95	13528	13.7806	0.0206351
SP_PIR_KEYWORDS	disease mutation	16	2.20994	0.000504677	ALDH6A1, SATB2, FGFR3, MYO6, MLC1, PAX6, ACTN2, JAG1, MID1, CNGA3, ALDH7A1, LAMB2, SLC1A3, GPR56, DTNA, APC	71	1591	19235	2.72448	0.0441745
GOTERM_BP_FAT	GO:0048667~cell morphogenesis involved in neuron differentiation	7	0.966851	0.000346335	HES1, SEMA6A, SLC1A3, LAMB2, FOXG1, PAX6, APC	62	209	13528	7.30792	0.0776986
SP_PIR_KEYWORDS	developmental protein	11	1.51934	0.000492419	SEMA6A, SATB2, EYA2, SEMA6D, DZIP1, FOXG1, PAX6, FZD3, JAG1, SPATA6, MAB21L1	71	779	19235	3.82551	0.08439
GOTERM_BP_FAT	GO:0048666~neuron development	8	1.10497	0.000796113	HES1, SEMA6A, SLC1A3, LAMB2, MYO6, FOXG1, PAX6, APC	62	339	13528	5.14911	0.100815
GOTERM_BP_FAT	GO:0000904~cell morphogenesis involved in differentiation	7	0.966851	0.000784514	HES1, SEMA6A, SLC1A3, LAMB2, FOXG1, PAX6, APC	62	244	13528	6.25965	0.115003
SP_PIR_KEYWORDS	actin-binding	6	0.828729	0.0020581	SYNE2, MYO6, SSFA2, ACTN2, HIP1, MYO5C	71	247	19235	6.58094	0.115672
GOTERM_BP_FAT	GO:0030182~neuron differentiation	9	1.24309	0.000740634	HES1, SEMA6A, SLC1A3, LAMB2, MYO6, FOXG1, PAX6, JAG1, APC	62	438	13528	4.48343	0.129251
GOTERM_CC_FAT	GO:0031226~intrinsic to plasma membrane	13	1.79558	0.00347365	FGFR3, GRIK1, SLC20A2, FZD3, JAG1, ALK, PRKD1, ITGB8, GPR56, JAM2, PILRB, HS3ST3B1, F2R	54	1215	12782	2.53263	0.137471
GOTERM_CC_FAT	GO:0044459~plasma membrane part	20	2.76243	0.000879894	FGFR3, MYO6, GRIK1, SLC20A2, ACTN2, FZD3, CDH2, JAG1, ALK, PRKD1, SYNE2, SLC1A3, ITGB8, GPR56, JAM2, PILRB, HS3ST3B1, DTNA, F2R, APC	54	2203	12782	2.14892	0.138989
GOTERM_BP_FAT	GO:0030030~cell projection organization	8	1.10497	0.00128395	SEMA6A, LAMB2, MYO6, PDGFA, FOXG1, PAX6, ACTN2, APC	62	368	13528	4.74334	0.13929
GOTERM_CC_FAT	GO:0005887~integral to plasma membrane	13	1.79558	0.00288419	FGFR3, GRIK1, SLC20A2, FZD3, JAG1, ALK, PRKD1, ITGB8, GPR56, JAM2, PILRB, HS3ST3B1, F2R	54	1188	12782	2.59019	0.150981
GOTERM_CC_FAT	GO:0042995~cell projection	10	1.38122	0.00207015	SEMA6A, SLC1A3, MYO6, GRIK1, PDGFA, ACTN2, CDH2, CNGA3, SGEF, APC	54	697	12782	3.39604	0.161504
UP_SEQ_FEATURE	sequence variant	58	8.01105	0.000560026	ZNF83, GRIK1, DZIP1, ARNT2, PAX6, JAG1, DPY19L1, PRMT3, SLC1A3, TRIM9, SLC24A3, JAKMIP2, PILRB, ZNF43, TRPM3, ALDH6A1, SATB2, MYO6, GATM, ACTN2, ALK, CNGA3, PRKD1, ADAMTS9, ALDH7A1, EYA2, SIPA1L1, GPR56, JAM2, FGFR3, SSFA2, DENND2A, CDH2, ZNF177, LAMB2, ITGB8, IDH1, FBXO3, SPATA6, ACSL3, HIP1, APC, DTNA, MYO5C, NES, MLC1, PSRC1, ZFP2, MID1, SEMA6A, SYNE2, SEMA6D, SALL1, RASSF2, MAB21L1, SGEF, ZNF…	71	11992	19113	1.30199	0.183547
SP_PIR_KEYWORDS	coiled coil	16	2.20994	0.00537272	TRPM3, NES, MYO6, SSFA2, DZIP1, PSRC1, MID1, LAMB2, SYNE2, TRIM9, SIPA1L1, JAKMIP2, DTNA, APC, MYO5C, HIP1	71	2019	19235	2.14693	0.214219
GOTERM_BP_FAT	GO:0008284~positive regulation of cell proliferation	8	1.10497	0.00250876	HES1, FGFR3, PDGFA, FOXG1, ARNT2, PAX6, MAB21L1, F2R	62	414	13528	4.2163	0.229473
GOTERM_BP_FAT	GO:0042491~auditory receptor cell differentiation	3	0.414365	0.00292111	HES1, MYO6, JAG1	62	18	13528	36.3656	0.239083
GOTERM_BP_FAT	GO:0045165~cell fate commitment	5	0.690608	0.00354062	HES1, EYA2, SALL1, PAX6, JAG1	62	139	13528	7.84869	0.260044
GOTERM_BP_FAT	GO:0032989~cellular component morphogenesis	7	0.966851	0.00876571	HES1, SEMA6A, SLC1A3, LAMB2, FOXG1, PAX6, APC	62	397	13528	3.84724	0.271144
GOTERM_BP_FAT	GO:0031175~neuron projection development	6	0.828729	0.00586114	SEMA6A, LAMB2, MYO6, FOXG1, PAX6, APC	62	256	13528	5.11391	0.276001
GOTERM_BP_FAT	GO:0010557~positive regulation of macromolecule biosynthetic process	9	1.24309	0.00875119	HES1, SATB2, MYO6, PDGFA, ARNT2, PSRC1, PAX6, ARNTL, F2R	62	654	13528	3.00266	0.279913
GOTERM_BP_FAT	GO:0030334~regulation of cell migration	5	0.690608	0.00705564	PDGFA, PAX6, JAG1, F2R, APC	62	169	13528	6.45543	0.281555
GOTERM_BP_FAT	GO:0031110~regulation of microtubule polymerization or depolymerization	3	0.414365	0.0085503	PSRC1, MID1, APC	62	31	13528	21.1155	0.284075
GOTERM_BP_FAT	GO:0051254~positive regulation of RNA metabolic process	8	1.10497	0.0057118	HES1, SATB2, MYO6, ARNT2, PSRC1, PAX6, ARNTL, F2R	62	481	13528	3.629	0.28422
GOTERM_BP_FAT	GO:0042490~mechanoreceptor differentiation	3	0.414365	0.00750865	HES1, MYO6, JAG1	62	29	13528	22.5717	0.284817
GOTERM_BP_FAT	GO:0045665~negative regulation of neuron differentiation	3	0.414365	0.00965286	HES1, FOXG1, PAX6	62	33	13528	19.8358	0.285048
GOTERM_BP_FAT	GO:0001709~cell fate determination	3	0.414365	0.00965286	HES1, PAX6, JAG1	62	33	13528	19.8358	0.285048
GOTERM_BP_FAT	GO:0042127~regulation of cell proliferation	10	1.38122	0.00831584	HES1, FGFR3, PDGFA, FOXG1, ARNT2, PAX6, JAG1, MAB21L1, F2R, APC	62	787	13528	2.77247	0.287594
SP_PIR_KEYWORDS	chromosomal rearrangement	5	0.690608	0.018809	SATB2, FGFR3, LHFP, ALK, HIP1	71	279	19235	4.85512	0.28815
GOTERM_BP_FAT	GO:0045893~positive regulation of transcription, DNA-dependent	8	1.10497	0.00546135	HES1, SATB2, MYO6, ARNT2, PSRC1, PAX6, ARNTL, F2R	62	477	13528	3.65943	0.288935
GOTERM_BP_FAT	GO:0051173~positive regulation of nitrogen compound metabolic process	9	1.24309	0.00800753	HES1, SATB2, MYO6, PDGFA, ARNT2, PSRC1, PAX6, ARNTL, F2R	62	644	13528	3.04929	0.289172
GOTERM_BP_FAT	GO:0007389~pattern specification process	6	0.828729	0.00697809	HES1, SATB2, FOXG1, PAX6, MID1, APC	62	267	13528	4.90323	0.291235
SP_PIR_KEYWORDS	duplication	5	0.690608	0.00957664	PRKD1, FGFR3, ITGB8, ACTN2, CDH2	71	228	19235	5.94113	0.291422
GOTERM_BP_FAT	GO:0045935~positive regulation of nucleobase, nucleoside, nucleotide and nucleic acid metabolic process	9	1.24309	0.00666493	HES1, SATB2, MYO6, PDGFA, ARNT2, PSRC1, PAX6, ARNTL, F2R	62	624	13528	3.14702	0.29319
SP_PIR_KEYWORDS	phosphoprotein	37	5.1105	0.0134995	FGFR3, GRIK1, SLC20A2, SSFA2, DENND2A, CDH2, PRMT3, SLC1A3, TRIM9, SLC35F2, PITPNC1, SPATA6, ACSL3, DTNA, APC, MYO5C, HIP1, SATB2, NES, MYO6, GATM, PSRC1, TLE1, ACTN2, ARNTL, MID1, ALK, PRKD1, HES1, SYNE2, EYA2, SEMA6D, SIPA1L1, SALL1, RASSF2, SGEF, F2R	71	7263	19235	1.38013	0.293585
GOTERM_BP_FAT	GO:0000902~cell morphogenesis	7	0.966851	0.00523028	HES1, SEMA6A, SLC1A3, LAMB2, FOXG1, PAX6, APC	62	356	13528	4.29032	0.295206
SP_PIR_KEYWORDS	polymorphism	52	7.18232	0.0175456	ZNF83, GRIK1, DZIP1, ARNT2, JAG1, DPY19L1, PRMT3, SLC1A3, TRIM9, SLC24A3, JAKMIP2, PILRB, ZNF43, TRPM3, GATM, ACTN2, ALK, CNGA3, PRKD1, ADAMTS9, ALDH7A1, EYA2, SIPA1L1, GPR56, JAM2, FGFR3, SSFA2, DENND2A, CDH2, ZNF177, LAMB2, ITGB8, IDH1, FBXO3, SPATA6, ACSL3, HIP1, APC, MYO5C, NES, MLC1, PSRC1, ZFP2, SEMA6A, SYNE2, SEMA6D, SALL1, RASSF2, MAB21L1, SGEF, ZNF573, F2R	71	11550	19235	1.21971	0.296762
KEGG_PATHWAY	hsa04810:Regulation of actin cytoskeleton	6	0.828729	0.00571628	FGFR3, PDGFA, ITGB8, ACTN2, F2R, APC	29	215	5085	4.89334	0.299125
GOTERM_BP_FAT	GO:0031328~positive regulation of cellular biosynthetic process	9	1.24309	0.01139	HES1, SATB2, MYO6, PDGFA, ARNT2, PSRC1, PAX6, ARNTL, F2R	62	685	13528	2.86678	0.299979
SP_PIR_KEYWORDS	Transcription	15	2.07182	0.0159316	ZNF43, ZNF83, SATB2, ARNT2, PAX6, TLE1, ZFP2, ARNTL, ZNF177, HES1, EYA2, SALL1, FOXG1, HIP1, ZNF573	71	2071	19235	1.96221	0.301863
GOTERM_BP_FAT	GO:0051270~regulation of cell motion	5	0.690608	0.0111309	PDGFA, PAX6, JAG1, F2R, APC	62	193	13528	5.65268	0.302674
GOTERM_BP_FAT	GO:0007409~axonogenesis	5	0.690608	0.0111309	SEMA6A, LAMB2, FOXG1, PAX6, APC	62	193	13528	5.65268	0.302674
GOTERM_BP_FAT	GO:0009891~positive regulation of biosynthetic process	9	1.24309	0.0123562	HES1, SATB2, MYO6, PDGFA, ARNT2, PSRC1, PAX6, ARNTL, F2R	62	695	13528	2.82553	0.304339
GOTERM_BP_FAT	GO:0040012~regulation of locomotion	5	0.690608	0.0109365	PDGFA, PAX6, JAG1, F2R, APC	62	192	13528	5.68212	0.307065
SP_PIR_KEYWORDS	alternative splicing	37	5.1105	0.0224205	ZNF83, FGFR3, GRIK1, PDGFA, DZIP1, SSFA2, ARNT2, PAX6, DENND2A, DPY19L1, TRIM9, SLC35F2, PITPNC1, FBXO3, SPATA6, JAKMIP2, PILRB, DTNA, APC, HIP1, ZNF43, TRPM3, MYO6, GATM, PSRC1, FZD3, ARNTL, MID1, SEMA6A, ADAMTS9, SYNE2, EYA2, SEMA6D, SIPA1L1, GPR56, SGEF, ZNF573	71	7488	19235	1.33866	0.308571
GOTERM_BP_FAT	GO:0048598~embryonic morphogenesis	6	0.828729	0.0122972	HES1, SATB2, EYA2, MYO6, FOXG1, FZD3	62	307	13528	4.26437	0.311197
GOTERM_BP_FAT	GO:0060113~inner ear receptor cell differentiation	3	0.414365	0.00517871	HES1, MYO6, JAG1	62	24	13528	27.2742	0.31136
GOTERM_BP_FAT	GO:0045941~positive regulation of transcription	8	1.10497	0.0131094	HES1, SATB2, MYO6, ARNT2, PSRC1, PAX6, ARNTL, F2R	62	564	13528	3.09494	0.311672
SP_PIR_KEYWORDS	receptor	12	1.65746	0.0271464	TRPM3, FGFR3, GRIK1, SLC20A2, ITGB8, GPR56, FZD3, ARNTL, ALK, CNGA3, PILRB, F2R	71	1583	19235	2.05369	0.315421
GOTERM_BP_FAT	GO:0010604~positive regulation of macromolecule metabolic process	10	1.38122	0.0140436	HES1, SATB2, MYO6, PDGFA, ARNT2, PSRC1, PAX6, ARNTL, F2R, APC	62	857	13528	2.54602	0.321941
GOTERM_BP_FAT	GO:0031644~regulation of neurological system process	5	0.690608	0.00498029	SLC1A3, MYO6, GRIK1, CDH2, F2R	62	153	13528	7.13051	0.321995
SP_PIR_KEYWORDS	differentiation	6	0.828729	0.0260266	SEMA6A, SEMA6D, DZIP1, PAX6, SPATA6, HIP1	71	460	19235	3.53368	0.325222
GOTERM_BP_FAT	GO:0048812~neuron projection morphogenesis	5	0.690608	0.0154994	SEMA6A, LAMB2, FOXG1, PAX6, APC	62	213	13528	5.12191	0.325861
SP_PIR_KEYWORDS	transcription regulation	15	2.07182	0.0133291	ZNF43, ZNF83, SATB2, ARNT2, PAX6, TLE1, ZFP2, ARNTL, ZNF177, HES1, EYA2, SALL1, FOXG1, HIP1, ZNF573	71	2026	19235	2.00579	0.329899
GOTERM_BP_FAT	GO:0070507~regulation of microtubule cytoskeleton organization	3	0.414365	0.015338	PSRC1, MID1, APC	62	42	13528	15.5853	0.330362
GOTERM_BP_FAT	GO:0045596~negative regulation of cell differentiation	5	0.690608	0.0162357	HES1, FOXG1, PAX6, JAG1, APC	62	216	13528	5.05078	0.33124
GOTERM_BP_FAT	GO:0010628~positive regulation of gene expression	8	1.10497	0.0152255	HES1, SATB2, MYO6, ARNT2, PSRC1, PAX6, ARNTL, F2R	62	581	13528	3.00439	0.33597
GOTERM_CC_FAT	GO:0043005~neuron projection	6	0.828729	0.01337	SEMA6A, SLC1A3, MYO6, GRIK1, ACTN2, APC	54	342	12782	4.1527	0.367229
GOTERM_BP_FAT	GO:0032886~regulation of microtubule-based process	3	0.414365	0.0205324	PSRC1, MID1, APC	62	49	13528	13.3588	0.391551
SP_PIR_KEYWORDS	zinc-finger	12	1.65746	0.0452952	PRKD1, ZNF43, PRMT3, ZNF83, TRIM9, SALL1, DZIP1, ZFP2, MID1, ZNF177, DTNA, ZNF573	71	1718	19235	1.89231	0.404632
GOTERM_BP_FAT	GO:0045664~regulation of neuron differentiation	4	0.552486	0.0220972	HES1, FOXG1, PAX6, CDH2	62	133	13528	6.56221	0.406522
GOTERM_BP_FAT	GO:0048562~embryonic organ morphogenesis	4	0.552486	0.0220972	SATB2, MYO6, FOXG1, FZD3	62	133	13528	6.56221	0.406522
SP_PIR_KEYWORDS	signal	19	2.62431	0.0401123	FGFR3, GRIK1, PDGFA, FZD3, CDH2, JAG1, LHFP, ALK, SEMA6A, ADAMTS9, LAMB2, SEMA6D, SLC24A3, ITGB8, GPR56, JAM2, SPATA6, PILRB, F2R	71	3250	19235	1.58381	0.407518
SP_PIR_KEYWORDS	transmembrane	26	3.59116	0.0432513	FGFR3, GRIK1, SLC20A2, JAG1, CDH2, DPY19L1, SLC1A3, SLC24A3, ITGB8, SLC35F2, ACSL3, PILRB, TRPM3, MLC1, B3GALT1, FZD3, LHFP, ALK, CNGA3, SEMA6A, SYNE2, SEMA6D, GPR56, JAM2, HS3ST3B1, F2R	71	4973	19235	1.41641	0.409997
GOTERM_BP_FAT	GO:0051493~regulation of cytoskeleton organization	4	0.552486	0.0234161	PDGFA, PSRC1, MID1, APC	62	136	13528	6.41746	0.41712
GOTERM_BP_FAT	GO:0048858~cell projection morphogenesis	5	0.690608	0.024499	SEMA6A, LAMB2, FOXG1, PAX6, APC	62	245	13528	4.45293	0.42397
GOTERM_BP_FAT	GO:0021903~rostrocaudal neural tube patterning	2	0.276243	0.0267567	HES1, PAX6	62	6	13528	72.7312	0.430454
GOTERM_BP_FAT	GO:0045944~positive regulation of transcription from RNA polymerase II promoter	6	0.828729	0.0256484	HES1, SATB2, MYO6, ARNT2, PAX6, ARNTL	62	371	13528	3.52874	0.431285
GOTERM_BP_FAT	GO:0042472~inner ear morphogenesis	3	0.414365	0.0263536	MYO6, FOXG1, FZD3	62	56	13528	11.6889	0.432729
GOTERM_BP_FAT	GO:0051969~regulation of transmission of nerve impulse	4	0.552486	0.028612	SLC1A3, MYO6, GRIK1, CDH2	62	147	13528	5.93724	0.438352
GOTERM_BP_FAT	GO:0032990~cell part morphogenesis	5	0.690608	0.0281941	SEMA6A, LAMB2, FOXG1, PAX6, APC	62	256	13528	4.26159	0.440486
GOTERM_BP_FAT	GO:0009953~dorsal/ventral pattern formation	3	0.414365	0.0299449	FOXG1, PAX6, APC	62	60	13528	10.9097	0.446547
GOTERM_BP_FAT	GO:0050808~synapse organization	3	0.414365	0.0308716	MYO6, CDH2, F2R	62	61	13528	10.7308	0.449938
SP_PIR_KEYWORDS	repressor	5	0.690608	0.0739314	HES1, SATB2, SALL1, PAX6, TLE1	71	435	19235	3.11397	0.464701
SP_PIR_KEYWORDS	magnesium	5	0.690608	0.0773809	PRKD1, EYA2, FGFR3, IDH1, ACSL3	71	442	19235	3.06465	0.465702
SP_PIR_KEYWORDS	Symport	3	0.414365	0.0618514	SLC1A3, SLC24A3, SLC20A2	71	111	19235	7.32204	0.470023
SP_PIR_KEYWORDS	ion transport	6	0.828729	0.0592439	TRPM3, MLC1, GRIK1, SLC24A3, SLC20A2, CNGA3	71	578	19235	2.81227	0.474311
SP_PIR_KEYWORDS	dna-binding	12	1.65746	0.0738669	ZNF43, HES1, SATB2, ZNF83, SALL1, FOXG1, ARNT2, PAX6, ZFP2, ARNTL, ZNF177, ZNF573	71	1868	19235	1.74036	0.480087
GOTERM_BP_FAT	GO:0021915~neural tube development	3	0.414365	0.0376689	HES1, PAX6, FZD3	62	68	13528	9.62619	0.485274
GOTERM_BP_FAT	GO:0042471~ear morphogenesis	3	0.414365	0.0356725	MYO6, FOXG1, FZD3	62	66	13528	9.91789	0.485847
GOTERM_BP_FAT	GO:0050767~regulation of neurogenesis	4	0.552486	0.0389104	HES1, FOXG1, PAX6, CDH2	62	166	13528	5.25768	0.490318
GOTERM_BP_FAT	GO:0022610~biological adhesion	8	1.10497	0.0375429	HES1, LAMB2, ITGB8, GPR56, ACTN2, CDH2, JAM2, APC	62	701	13528	2.49008	0.490509
GOTERM_BP_FAT	GO:0002052~positive regulation of neuroblast proliferation	2	0.276243	0.0355182	FOXG1, PAX6	62	8	13528	54.5484	0.491123
SP_PIR_KEYWORDS	membrane	30	4.14365	0.0733216	FGFR3, GRIK1, SLC20A2, JAG1, CDH2, DPY19L1, SLC1A3, ITGB8, SLC24A3, SLC35F2, ACSL3, PILRB, HIP1, TRPM3, MLC1, MYO6, GATM, B3GALT1, FZD3, LHFP, ALK, CNGA3, PRKD1, SEMA6A, SYNE2, SEMA6D, GPR56, JAM2, HS3ST3B1, F2R	71	6256	19235	1.29915	0.494158
GOTERM_BP_FAT	GO:0007155~cell adhesion	8	1.10497	0.0372974	HES1, LAMB2, ITGB8, GPR56, ACTN2, CDH2, JAM2, APC	62	700	13528	2.49364	0.494765
SP_PIR_KEYWORDS	glycoprotein	22	3.03867	0.0877737	FGFR3, GRIK1, PDGFA, SLC20A2, B3GALT1, FZD3, CDH2, JAG1, ALK, SEMA6A, ADAMTS9, SLC1A3, LAMB2, SEMA6D, SLC24A3, ITGB8, GPR56, JAM2, SPATA6, PILRB, HS3ST3B1, F2R	71	4318	19235	1.3803	0.495999
SP_PIR_KEYWORDS	wnt signaling pathway	3	0.414365	0.0729204	TLE1, FZD3, APC	71	122	19235	6.66186	0.509987
SP_PIR_KEYWORDS	zinc	13	1.79558	0.0959612	ZNF43, ZNF83, DZIP1, ZFP2, ZNF177, MID1, PRMT3, PRKD1, ADAMTS9, TRIM9, SALL1, ZNF573, DTNA	71	2189	19235	1.60891	0.514377
GOTERM_BP_FAT	GO:0048568~embryonic organ development	4	0.552486	0.0425061	SATB2, MYO6, FOXG1, FZD3	62	172	13528	5.07427	0.515408
GOTERM_BP_FAT	GO:0006357~regulation of transcription from RNA polymerase II promoter	8	1.10497	0.0443065	HES1, SATB2, MYO6, ARNT2, PAX6, TLE1, ARNTL, ZNF177	62	727	13528	2.40103	0.517984
GOTERM_BP_FAT	GO:0030858~positive regulation of epithelial cell differentiation	2	0.276243	0.044202	PAX6, APC	62	10	13528	43.6387	0.523262
GOTERM_BP_FAT	GO:0044057~regulation of system process	5	0.690608	0.0504915	SLC1A3, MYO6, GRIK1, CDH2, F2R	62	309	13528	3.53064	0.54765
GOTERM_BP_FAT	GO:0008544~epidermis development	4	0.552486	0.0501813	PDGFA, PAX6, JAG1, APC	62	184	13528	4.74334	0.551316
GOTERM_BP_FAT	GO:0031116~positive regulation of microtubule polymerization	2	0.276243	0.052809	PSRC1, APC	62	12	13528	36.3656	0.552619
GOTERM_BP_FAT	GO:0006355~regulation of transcription, DNA-dependent	14	1.9337	0.0499802	ZNF43, ZNF83, SATB2, MYO6, PSRC1, ARNT2, PAX6, TLE1, ARNTL, ZNF177, HES1, FOXG1, ZNF573, F2R	62	1773	13528	1.7229	0.555884
GOTERM_BP_FAT	GO:0007267~cell-cell signaling	7	0.966851	0.0525722	SLC1A3, MYO6, GRIK1, PDGFA, SALL1, GPR56, DTNA	62	600	13528	2.54559	0.55672
GOTERM_BP_FAT	GO:0010035~response to inorganic substance	4	0.552486	0.0651168	SLC1A3, GATM, PDGFA, CNGA3	62	205	13528	4.25744	0.562858
GOTERM_BP_FAT	GO:0060284~regulation of cell development	4	0.552486	0.0651168	HES1, FOXG1, PAX6, CDH2	62	205	13528	4.25744	0.562858
GOTERM_BP_FAT	GO:0009792~embryonic development ending in birth or egg hatching	5	0.690608	0.0636116	HES1, SATB2, ARNT2, PAX6, FZD3	62	334	13528	3.26637	0.563757
GOTERM_BP_FAT	GO:0009100~glycoprotein metabolic process	4	0.552486	0.0628693	ADAMTS9, B3GALT1, ALK, HS3ST3B1	62	202	13528	4.32066	0.564291
GOTERM_BP_FAT	GO:0031112~positive regulation of microtubule polymerization or depolymerization	2	0.276243	0.0570838	PSRC1, APC	62	13	13528	33.5682	0.564733
GOTERM_BP_FAT	GO:0031113~regulation of microtubule polymerization	2	0.276243	0.0570838	PSRC1, APC	62	13	13528	33.5682	0.564733
GOTERM_BP_FAT	GO:0045449~regulation of transcription	18	2.48619	0.0646869	ZNF43, SATB2, ZNF83, MYO6, PSRC1, ARNT2, PAX6, TLE1, ZFP2, ARNTL, ZNF177, HES1, EYA2, SALL1, FOXG1, F2R, HIP1, ZNF573	62	2601	13528	1.50999	0.565171
GOTERM_BP_FAT	GO:0051252~regulation of RNA metabolic process	14	1.9337	0.0580149	ZNF43, ZNF83, SATB2, MYO6, PSRC1, ARNT2, PAX6, TLE1, ARNTL, ZNF177, HES1, FOXG1, ZNF573, F2R	62	1813	13528	1.68489	0.565324
GOTERM_BP_FAT	GO:0051960~regulation of nervous system development	4	0.552486	0.0556494	HES1, FOXG1, PAX6, CDH2	62	192	13528	4.5457	0.566388
GOTERM_BP_FAT	GO:0048545~response to steroid hormone stimulus	4	0.552486	0.0556494	PDGFA, ARNT2, IDH1, CNGA3	62	192	13528	4.5457	0.566388
GOTERM_BP_FAT	GO:0006811~ion transport	8	1.10497	0.05651	TRPM3, MLC1, SLC1A3, GRIK1, SLC24A3, SLC20A2, CNGA3, F2R	62	768	13528	2.27285	0.566495
GOTERM_BP_FAT	GO:0006928~cell motion	6	0.828729	0.0624998	SEMA6A, SATB2, FOXG1, PAX6, CDH2, APC	62	475	13528	2.75613	0.567081
GOTERM_BP_FAT	GO:0003002~regionalization	4	0.552486	0.0592066	HES1, FOXG1, PAX6, APC	62	197	13528	4.43033	0.56755
GOTERM_BP_FAT	GO:0030335~positive regulation of cell migration	3	0.414365	0.0610042	PDGFA, F2R, APC	62	89	13528	7.35484	0.568228
GOTERM_BP_FAT	GO:0043009~chordate embryonic development	5	0.690608	0.06195	HES1, SATB2, ARNT2, PAX6, FZD3	62	331	13528	3.29598	0.568844
GOTERM_BP_FAT	GO:0007398~ectoderm development	4	0.552486	0.0606591	PDGFA, PAX6, JAG1, APC	62	199	13528	4.3858	0.571324
GOTERM_BP_FAT	GO:0007026~negative regulation of microtubule depolymerization	2	0.276243	0.0697948	MID1, APC	62	16	13528	27.2742	0.584219
GOTERM_BP_FAT	GO:0031114~regulation of microtubule depolymerization	2	0.276243	0.0697948	MID1, APC	62	16	13528	27.2742	0.584219
GOTERM_BP_FAT	GO:0007605~sensory perception of sound	3	0.414365	0.07091	ALDH7A1, SLC1A3, MYO6	62	97	13528	6.74825	0.585512
GOTERM_BP_FAT	GO:0033043~regulation of organelle organization	4	0.552486	0.074473	PDGFA, PSRC1, MID1, APC	62	217	13528	4.022	0.585844
GOTERM_BP_FAT	GO:0040017~positive regulation of locomotion	3	0.414365	0.0721833	PDGFA, F2R, APC	62	98	13528	6.67939	0.587606
GOTERM_BP_FAT	GO:0051272~positive regulation of cell motion	3	0.414365	0.0721833	PDGFA, F2R, APC	62	98	13528	6.67939	0.587606
GOTERM_BP_FAT	GO:0031111~negative regulation of microtubule polymerization or depolymerization	2	0.276243	0.0739942	MID1, APC	62	17	13528	25.6698	0.587877
GOTERM_BP_FAT	GO:0035295~tube development	4	0.552486	0.0769015	HES1, PDGFA, SALL1, FZD3	62	220	13528	3.96716	0.589237
GOTERM_BP_FAT	GO:0042493~response to drug	4	0.552486	0.0736713	NES, SLC1A3, PDGFA, APC	62	216	13528	4.04062	0.590756
GOTERM_BP_FAT	GO:0006461~protein complex assembly	6	0.828729	0.0768641	AASS, ACTN2, CDH2, PILRB, HIP1, APC	62	505	13528	2.5924	0.593432
GOTERM_BP_FAT	GO:0070271~protein complex biogenesis	6	0.828729	0.0768641	AASS, ACTN2, CDH2, PILRB, HIP1, APC	62	505	13528	2.5924	0.593432
GOTERM_BP_FAT	GO:0050954~sensory perception of mechanical stimulus	3	0.414365	0.0786599	ALDH7A1, SLC1A3, MYO6	62	103	13528	6.35515	0.593521
GOTERM_BP_FAT	GO:0007169~transmembrane receptor protein tyrosine kinase signaling pathway	4	0.552486	0.0801939	FGFR3, PDGFA, ALK, PILRB	62	224	13528	3.89631	0.59661
GOTERM_BP_FAT	GO:0045597~positive regulation of cell differentiation	4	0.552486	0.0843951	FOXG1, PAX6, JAG1, APC	62	229	13528	3.81124	0.599488
GOTERM_BP_FAT	GO:0043010~camera-type eye development	3	0.414365	0.0839682	PAX6, MAB21L1, APC	62	107	13528	6.11758	0.601641
GOTERM_BP_FAT	GO:0007411~axon guidance	3	0.414365	0.0839682	SEMA6A, FOXG1, PAX6	62	107	13528	6.11758	0.601641
GOTERM_BP_FAT	GO:0021545~cranial nerve development	2	0.276243	0.0823371	HES1, SLC1A3	62	19	13528	22.9677	0.602461
GOTERM_BP_FAT	GO:0009725~response to hormone stimulus	5	0.690608	0.0834231	GATM, PDGFA, ARNT2, IDH1, CNGA3	62	367	13528	2.97266	0.603289
GOTERM_BP_FAT	GO:0021532~neural tube patterning	2	0.276243	0.0906062	HES1, PAX6	62	21	13528	20.7803	0.622739
KEGG_PATHWAY	hsa05200:Pathways in cancer	6	0.828729	0.0311735	FGFR3, LAMB2, PDGFA, ARNT2, FZD3, APC	29	328	5085	3.20753	0.62535
GOTERM_MF_FAT	GO:0003779~actin binding	6	0.828729	0.0149689	SYNE2, MYO6, SSFA2, ACTN2, HIP1, MYO5C	59	326	12983	4.05002	0.662405
SMART	SM00423:PSI	3	0.414365	0.0199163	SEMA6A, SEMA6D, ITGB8	45	45	9079	13.4504	0.682312
GOTERM_CC_FAT	GO:0005886~plasma membrane	22	3.03867	0.0747568	FGFR3, MYO6, GRIK1, SLC20A2, SSFA2, ACTN2, FZD3, CDH2, JAG1, ALK, PRKD1, SYNE2, SLC1A3, SEMA6D, ITGB8, GPR56, JAM2, PILRB, HS3ST3B1, DTNA, F2R, APC	54	3777	12782	1.37873	0.699046
GOTERM_CC_FAT	GO:0030054~cell junction	6	0.828729	0.0626049	GRIK1, ACTN2, CDH2, JAM2, DTNA, APC	54	518	12782	2.74174	0.705116
GOTERM_CC_FAT	GO:0044433~cytoplasmic vesicle part	4	0.552486	0.0423454	MYO6, PDGFA, ACTN2, HIP1	54	187	12782	5.06318	0.706516
GOTERM_CC_FAT	GO:0044463~cell projection part	4	0.552486	0.0728209	SLC1A3, MYO6, ACTN2, APC	54	234	12782	4.04622	0.723445
GOTERM_CC_FAT	GO:0045202~synapse	5	0.690608	0.0591549	SLC1A3, GRIK1, CDH2, DTNA, F2R	54	355	12782	3.33385	0.726309
UP_SEQ_FEATURE	domain:PAS 2	2	0.276243	0.0673701	ARNT2, ARNTL	71	19	19113	28.3365	0.735221
UP_SEQ_FEATURE	domain:PAS 1	2	0.276243	0.0673701	ARNT2, ARNTL	71	19	19113	28.3365	0.735221
UP_SEQ_FEATURE	domain:Actin-binding	2	0.276243	0.0707892	SYNE2, ACTN2	71	20	19113	26.9197	0.73523
UP_SEQ_FEATURE	repeat:Spectrin 4	2	0.276243	0.0741959	SYNE2, ACTN2	71	21	19113	25.6378	0.73524
UP_SEQ_FEATURE	repeat:Spectrin 3	2	0.276243	0.0775903	SYNE2, ACTN2	71	22	19113	24.4725	0.735249
UP_SEQ_FEATURE	domain:CH 2	2	0.276243	0.0943793	SYNE2, ACTN2	71	27	19113	19.9405	0.748487
UP_SEQ_FEATURE	domain:CH 1	2	0.276243	0.0943793	SYNE2, ACTN2	71	27	19113	19.9405	0.748487
KEGG_PATHWAY	hsa05412:Arrhythmogenic right ventricular cardiomyopathy (ARVC)	3	0.414365	0.0649037	ITGB8, ACTN2, CDH2	29	76	5085	6.92151	0.750139
UP_SEQ_FEATURE	zinc finger region:C2H2-type 8	5	0.690608	0.0666557	ZNF43, ZNF83, SALL1, ZFP2, ZNF573	71	417	19113	3.22778	0.750248
INTERPRO	IPR013087:Zinc finger, C2H2-type/integrase, DNA-binding	6	0.828729	0.0993297	ZNF43, ZNF83, SALL1, ZFP2, ZNF177, ZNF573	67	621	16659	2.40234	0.752137
UP_SEQ_FEATURE	zinc finger region:C2H2-type 11	4	0.552486	0.0924664	ZNF43, ZNF83, ZFP2, ZNF573	71	293	19113	3.67505	0.754613
GOTERM_CC_FAT	GO:0005667~transcription factor complex	4	0.552486	0.0562632	SATB2, ARNT2, TLE1, ARNTL	54	210	12782	4.50864	0.75496
UP_SEQ_FEATURE	zinc finger region:C2H2-type 15	3	0.414365	0.0865902	ZNF43, ZNF83, ZNF573	71	134	19113	6.0268	0.759613
UP_SEQ_FEATURE	repeat:Spectrin 2	2	0.276243	0.0910457	SYNE2, ACTN2	71	26	19113	20.7075	0.76304
UP_SEQ_FEATURE	domain:PAC	2	0.276243	0.0910457	ARNT2, ARNTL	71	26	19113	20.7075	0.76304
UP_SEQ_FEATURE	repeat:Spectrin 1	2	0.276243	0.0910457	SYNE2, ACTN2	71	26	19113	20.7075	0.76304
UP_SEQ_FEATURE	splice variant	35	4.83425	0.0655895	ZNF83, FGFR3, GRIK1, PDGFA, SSFA2, DZIP1, ARNT2, PAX6, DENND2A, DPY19L1, TRIM9, SLC35F2, PITPNC1, FBXO3, SPATA6, JAKMIP2, PILRB, DTNA, APC, ZNF43, TRPM3, MYO6, GATM, PSRC1, ARNTL, MID1, SEMA6A, ADAMTS9, SYNE2, EYA2, SEMA6D, SIPA1L1, GPR56, SGEF, ZNF573	71	7458	19113	1.26333	0.764155
GOTERM_MF_FAT	GO:0017162~aryl hydrocarbon receptor binding	2	0.276243	0.0133434	ARNT2, ARNTL	59	3	12983	146.701	0.765614
INTERPRO	IPR001610:PAC motif	2	0.276243	0.0981343	ARNT2, ARNTL	67	26	16659	19.1263	0.771351
GOTERM_MF_FAT	GO:0008092~cytoskeletal protein binding	8	1.10497	0.00690903	SYNE2, MYO6, SSFA2, PSRC1, ACTN2, HIP1, MYO5C, APC	59	504	12983	3.49287	0.776318
INTERPRO	IPR002017:Spectrin repeat	2	0.276243	0.0800295	SYNE2, ACTN2	67	21	16659	23.6802	0.780546
UP_SEQ_FEATURE	zinc finger region:C2H2-type 9	5	0.690608	0.0490759	ZNF43, ZNF83, SALL1, ZFP2, ZNF573	71	376	19113	3.57975	0.780854
INTERPRO	IPR001589:Actinin-type, actin-binding, conserved site	2	0.276243	0.087314	SYNE2, ACTN2	67	23	16659	21.621	0.781883
INTERPRO	IPR013767:PAS fold	2	0.276243	0.0945416	ARNT2, ARNTL	67	25	16659	19.8913	0.783011
UP_SEQ_FEATURE	domain:Helix-loop-helix motif	3	0.414365	0.0655312	HES1, ARNT2, ARNTL	71	114	19113	7.08414	0.784211
INTERPRO	IPR001092:Basic helix-loop-helix dimerisation region bHLH	3	0.414365	0.0750511	HES1, ARNT2, ARNTL	67	114	16659	6.54321	0.789934
KEGG_PATHWAY	hsa04510:Focal adhesion	4	0.552486	0.0967203	LAMB2, PDGFA, ITGB8, ACTN2	29	201	5085	3.48945	0.793345
INTERPRO	IPR017903:COS domain	2	0.276243	0.0465345	TRIM9, MID1	67	12	16659	41.4403	0.795748
INTERPRO	IPR003649:B-box, C-terminal	2	0.276243	0.0540801	TRIM9, MID1	67	14	16659	35.5203	0.795768
UP_SEQ_FEATURE	zinc finger region:C2H2-type 5	6	0.828729	0.0471658	ZNF43, ZNF83, SALL1, ZFP2, ZNF177, ZNF573	71	538	19113	3.0022	0.79607
UP_SEQ_FEATURE	zinc finger region:B box-type 1	2	0.276243	0.0430867	TRIM9, MID1	71	12	19113	44.8662	0.796957
UP_SEQ_FEATURE	zinc finger region:C2H2-type 12	4	0.552486	0.0651344	ZNF43, ZNF83, ZFP2, ZNF573	71	252	19113	4.27297	0.803175
UP_SEQ_FEATURE	zinc finger region:B box-type 2	2	0.276243	0.0570382	TRIM9, MID1	71	16	19113	33.6496	0.805124
INTERPRO	IPR016162:Aldehyde dehydrogenase, N-terminal	2	0.276243	0.0726878	ALDH6A1, ALDH7A1	67	19	16659	26.1728	0.813066
UP_SEQ_FEATURE	compositionally biased region:Pro/Ser-rich	2	0.276243	0.0639386	PSRC1, TLE1	71	18	19113	29.9108	0.818861
SMART	SM00355:ZnF_C2H2	8	1.10497	0.0867325	ZNF43, PRMT3, ZNF83, SALL1, DZIP1, ZFP2, ZNF177, ZNF573	45	797	9079	2.02515	0.821613
UP_SEQ_FEATURE	signal peptide	19	2.62431	0.0423679	FGFR3, GRIK1, PDGFA, FZD3, CDH2, JAG1, LHFP, ALK, SEMA6A, ADAMTS9, LAMB2, SEMA6D, SLC24A3, ITGB8, GPR56, JAM2, SPATA6, PILRB, F2R	71	3250	19113	1.57377	0.824705
INTERPRO	IPR013655:PAS fold-3	2	0.276243	0.0689953	ARNT2, ARNTL	67	18	16659	27.6269	0.832584
INTERPRO	IPR015590:Aldehyde dehydrogenase	2	0.276243	0.0689953	ALDH6A1, ALDH7A1	67	18	16659	27.6269	0.832584
INTERPRO	IPR011598:Helix-loop-helix DNA-binding	3	0.414365	0.0437744	HES1, ARNT2, ARNTL	67	84	16659	8.88006	0.833116
UP_SEQ_FEATURE	transmembrane region	26	3.59116	0.0404168	FGFR3, GRIK1, SLC20A2, JAG1, CDH2, DPY19L1, SLC1A3, SLC24A3, ITGB8, SLC35F2, ACSL3, PILRB, TRPM3, MLC1, B3GALT1, FZD3, LHFP, ALK, CNGA3, SEMA6A, SYNE2, SEMA6D, GPR56, JAM2, HS3ST3B1, F2R	71	4911	19113	1.42519	0.84539
INTERPRO	IPR015880:Zinc finger, C2H2-like	8	1.10497	0.0377376	ZNF43, PRMT3, ZNF83, SALL1, DZIP1, ZFP2, ZNF177, ZNF573	67	797	16659	2.49578	0.853892
SMART	SM00502:BBC	2	0.276243	0.0657981	TRIM9, MID1	45	14	9079	28.8222	0.856265
UP_SEQ_FEATURE	domain:COS	2	0.276243	0.0395672	TRIM9, MID1	71	11	19113	48.9449	0.876037
UP_SEQ_FEATURE	zinc finger region:C2H2-type 13	4	0.552486	0.0375187	ZNF43, ZNF83, ZFP2, ZNF573	71	201	19113	5.35716	0.900459
INTERPRO	IPR007087:Zinc finger, C2H2-type	8	1.10497	0.0349894	ZNF43, PRMT3, ZNF83, SALL1, DZIP1, ZFP2, ZNF177, ZNF573	67	784	16659	2.53716	0.906931
UP_SEQ_FEATURE	topological domain:Extracellular	17	2.34807	0.0345482	TRPM3, FGFR3, GRIK1, SLC20A2, FZD3, CDH2, JAG1, ALK, SEMA6A, SLC1A3, SEMA6D, SLC24A3, ITGB8, GPR56, JAM2, PILRB, F2R	71	2719	19113	1.6831	0.921568
INTERPRO	IPR003659:Plexin/semaphorin/integrin	3	0.414365	0.0137153	SEMA6A, SEMA6D, ITGB8	67	45	16659	16.5761	0.936838
INTERPRO	IPR001067:Nuclear translocator	2	0.276243	0.0274102	ARNT2, ARNTL	67	7	16659	71.0405	0.937917
UP_SEQ_FEATURE	topological domain:Cytoplasmic	21	2.90055	0.0162386	TRPM3, FGFR3, GRIK1, SLC20A2, B3GALT1, FZD3, CDH2, JAG1, ALK, SEMA6A, SYNE2, SLC1A3, SEMA6D, SLC24A3, ITGB8, GPR56, JAM2, ACSL3, PILRB, HS3ST3B1, F2R	71	3374	19113	1.6755	0.948352
UP_SEQ_FEATURE	zinc finger region:C2H2-type 7	6	0.828729	0.0247456	ZNF43, ZNF83, SALL1, ZFP2, ZNF177, ZNF573	71	451	19113	3.58134	0.951371
UP_SEQ_FEATURE	zinc finger region:C2H2-type 6	6	0.828729	0.0331848	ZNF43, ZNF83, SALL1, ZFP2, ZNF177, ZNF573	71	488	19113	3.3098	0.952839
OMIM_DISEASE	Colorectal cancer, somatic	2	0.276243	0.0532496	FGFR3, APC	26	8	3671	35.2981	0.986738
GOTERM_MF_FAT	GO:0016620~oxidoreductase activity, acting on the aldehyde or oxo group of donors, NAD or NADP as acceptor	2	0.276243	0.0979339	ALDH6A1, ALDH7A1	59	23	12983	19.1349	0.996173

## Sheet: DAVID gene cluster 3
Category	Term	Count	%	PValue	Genes	List Total	Pop Hits	Pop Total	Fold Enrichment	Benjamini
SP_PIR_KEYWORDS	glycoprotein	55	4.68883	2.50594e-09	SCPEP1, IGFBP7, HEXB, TLR2, TGFB3, CDCP1, SLC7A7, CD97, TPP1, IL4R, PLOD3, PIGB, MAN2B1, IL13RA1, LAIR1, F11R, CTSZ, CD164, HLA-E, HLA-F, GNS, CD37, GRN, HLA-DPA1, CTSB, PGCP, BTN3A3, ADAM12, TWSG1, ENPP4, FPR1, CTSA, ITGB2, BDKRB2, FXYD5, CCL5, CD74, ITGAM, CALU, SLC11A1, LGALS3BP, TNFRSF1B, PROCR, SLC39A8, PLXND1, SELPLG, B4GALT5, CSF1R, SOAT1, TGFBR2, AXL, ITGA5, FCGR2A, SLC15A3, IGFBP5	114	4318	19235	2.14915	2.93195e-07
SP_PIR_KEYWORDS	signal	47	4.00682	1.68851e-09	SCPEP1, TWSG1, IGFBP7, ENPP4, HEXB, TLR2, TGFB3, CTSA, ITGB2, CDCP1, IL32, FXYD5, CCL5, ITGAM, CALU, CD97, TNFRSF1B, LGALS3BP, PROCR, TPP1, IL4R, PLOD3, MAN2B1, PLXND1, KIAA0247, IL13RA1, SELPLG, CSF1R, LAIR1, F11R, CTSZ, TGFBR2, AXL, CD164, TCN2, HLA-E, HLA-F, GNS, ITGA5, GRN, HLA-DPA1, PGCP, CTSB, FCGR2A, BTN3A3, ADAM12, IGFBP5	114	3250	19235	2.44007	3.95112e-07
SP_PIR_KEYWORDS	transmembrane protein	20	1.70503	6.0912e-09	SOAT1, TBXAS1, FPR1, AXL, ITGB2, BDKRB2, HLA-E, ITGAM, CD74, HLA-F, SLC11A1, TNFRSF1B, CD37, PROCR, ITGA5, IL4R, PIGB, FCGR2A, SELPLG, CSF1R	114	642	19235	5.25633	4.75114e-07
UP_SEQ_FEATURE	signal peptide	47	4.00682	2.08249e-09	SCPEP1, TWSG1, IGFBP7, ENPP4, HEXB, TLR2, TGFB3, CTSA, ITGB2, CDCP1, IL32, FXYD5, CCL5, ITGAM, CALU, CD97, TNFRSF1B, LGALS3BP, PROCR, TPP1, IL4R, PLOD3, MAN2B1, PLXND1, KIAA0247, IL13RA1, SELPLG, CSF1R, LAIR1, F11R, CTSZ, TGFBR2, AXL, CD164, TCN2, HLA-E, HLA-F, GNS, ITGA5, GRN, HLA-DPA1, PGCP, CTSB, FCGR2A, BTN3A3, ADAM12, IGFBP5	114	3250	19113	2.42459	9.41287e-07
SP_PIR_KEYWORDS	disulfide bond	42	3.58056	2.79065e-08	GALNT2, IGFBP7, HEXB, TLR2, TGFB3, FPR1, CTSA, ITGB2, CDCP1, BDKRB2, CCL5, CD74, ITGAM, SLC7A7, CD97, TNFRSF1B, LGALS3BP, PROCR, IL4R, MAN2B1, KIAA0247, IL13RA1, SELPLG, B4GALT5, CSF1R, LAIR1, F11R, CTSZ, TGFBR2, AXL, CLIC2, TCN2, HLA-E, HLA-F, ITGA5, GRN, HLA-DPA1, CTSB, FCGR2A, BTN3A3, ADAM12, IGFBP5	114	2924	19235	2.42359	1.63253e-06
UP_SEQ_FEATURE	disulfide bond	41	3.49531	3.85928e-08	GALNT2, IGFBP7, HEXB, TLR2, TGFB3, FPR1, CTSA, ITGB2, CDCP1, BDKRB2, CCL5, CD74, ITGAM, CD97, TNFRSF1B, LGALS3BP, PROCR, IL4R, MAN2B1, KIAA0247, IL13RA1, SELPLG, B4GALT5, CSF1R, LAIR1, F11R, CTSZ, TGFBR2, AXL, CLIC2, HLA-E, TCN2, HLA-F, ITGA5, GRN, HLA-DPA1, CTSB, FCGR2A, BTN3A3, ADAM12, IGFBP5	114	2819	19113	2.43844	8.72194e-06
UP_SEQ_FEATURE	glycosylation site:N-linked (GlcNAc...)	51	4.34783	5.86292e-08	SCPEP1, IGFBP7, HEXB, TLR2, TGFB3, CDCP1, SLC7A7, CD97, TPP1, IL4R, PLOD3, PIGB, MAN2B1, IL13RA1, LAIR1, F11R, CTSZ, HLA-E, CD164, HLA-F, GNS, CD37, GRN, HLA-DPA1, CTSB, PGCP, BTN3A3, ADAM12, TWSG1, ENPP4, FPR1, CTSA, ITGB2, BDKRB2, CD74, ITGAM, CALU, SLC11A1, LGALS3BP, TNFRSF1B, PROCR, SLC39A8, PLXND1, SELPLG, B4GALT5, CSF1R, TGFBR2, AXL, ITGA5, FCGR2A, SLC15A3	114	4129	19113	2.07085	8.83343e-06
SP_PIR_KEYWORDS	lysosome	10	0.852515	2.37145e-07	GNS, CTSZ, TPP1, HEXB, CTSA, CTSB, CD164, MAN2B1, SLC15A3, CD74	114	149	19235	11.324	1.10983e-05
GOTERM_BP_FAT	GO:0006955~immune response	21	1.79028	4.99108e-08	GALNT2, LAIR1, TLR2, MYO1F, IL32, HLA-E, CD164, CCL5, AIM2, CD74, HLA-F, CD97, GPI, SLC11A1, CYBA, CORO1A, TNFRSF1B, PROCR, IL4R, HLA-DPA1, ARHGDIB	96	690	13528	4.28877	6.32349e-05
GOTERM_CC_FAT	GO:0043235~receptor complex	9	0.767263	3.35248e-06	ITGA5, TGFBR2, ITGB2, MYH9, TRIP6, IL13RA1, ITGAM, CSF1R, SYK	101	116	12782	9.81888	0.000303354
GOTERM_CC_FAT	GO:0044459~plasma membrane part	38	3.23956	1.73345e-06	LIMS1, TGFB3, TLR2, ITGB2, BDKRB2, CD74, ITGAM, SLC7A7, CD97, SLC11A1, PROCR, IL4R, RRAS, SHC1, IL13RA1, SELPLG, EHD2, SYK, CSF1R, TES, F11R, TGFBR2, AXL, MYH9, CD164, HLA-E, HLA-F, SLC16A3, EPB41L3, CYBA, TNS3, CORO1A, CD37, SLC16A7, ITGA5, HLA-DPA1, CTSB, TRIP6	101	2203	12782	2.18296	0.000313705
GOTERM_CC_FAT	GO:0005764~lysosome	11	0.937766	5.76564e-06	GNS, SLC11A1, CTSZ, TPP1, HEXB, CTSA, CTSB, CD164, MAN2B1, SLC15A3, CD74	101	211	12782	6.59763	0.000347801
GOTERM_CC_FAT	GO:0000323~lytic vacuole	11	0.937766	5.76564e-06	GNS, SLC11A1, CTSZ, TPP1, HEXB, CTSA, CTSB, CD164, MAN2B1, SLC15A3, CD74	101	211	12782	6.59763	0.000347801
UP_SEQ_FEATURE	topological domain:Extracellular	35	2.9838	1.08402e-05	ENPP4, FPR1, TLR2, ITGB2, CDCP1, BDKRB2, FXYD5, ITGAM, CD74, CD97, SLC11A1, TNFRSF1B, PROCR, IL4R, SLC39A8, PLXND1, KIAA0247, IL13RA1, SELPLG, CSF1R, LAIR1, F11R, GIMAP5, TGFBR2, AXL, CD164, HLA-E, HLA-F, SLC16A3, CD37, ITGA5, HLA-DPA1, FCGR2A, BTN3A3, ADAM12	114	2719	19113	2.15816	0.0012242
GOTERM_CC_FAT	GO:0005773~vacuole	11	0.937766	2.70908e-05	GNS, SLC11A1, CTSZ, TPP1, HEXB, CTSA, CTSB, CD164, MAN2B1, SLC15A3, CD74	101	252	12782	5.5242	0.00122513
SP_PIR_KEYWORDS	heterodimer	7	0.59676	3.23661e-05	CYBA, ITGA5, ITGB2, HLA-DPA1, HLA-E, ITGAM, HLA-F	114	103	19235	11.467	0.0012615
GOTERM_BP_FAT	GO:0050900~leukocyte migration	7	0.59676	2.78047e-06	CORO1A, ITGB2, MYH9, CCL5, SELPLG, ITGAM, SYK	96	57	13528	17.3056	0.00175988
KEGG_PATHWAY	hsa04142:Lysosome	9	0.767263	4.53253e-05	GNS, SLC11A1, CTSZ, TPP1, HEXB, CTSA, CTSB, CD164, MAN2B1	59	117	5085	6.62973	0.00339371
SP_PIR_KEYWORDS	actin-binding	9	0.767263	0.000105885	EPB41L3, ARPC1B, CORO1A, PHACTR2, MYO1E, CAPG, MYO1F, MYH9, FLNB	114	247	19235	6.14799	0.0035335
GOTERM_CC_FAT	GO:0005887~integral to plasma membrane	23	1.96078	0.000102163	TGFBR2, AXL, TLR2, ITGB2, BDKRB2, MYH9, CD164, ITGAM, SLC7A7, SLC16A3, CD97, SLC11A1, CYBA, CD37, SLC16A7, PROCR, ITGA5, IL4R, HLA-DPA1, IL13RA1, TRIP6, SELPLG, CSF1R	101	1188	12782	2.45013	0.00369164
GOTERM_CC_FAT	GO:0005886~plasma membrane	48	4.09207	0.000163756	LIMS1, TLR2, TGFB3, FPR1, ITGB2, CDCP1, BDKRB2, CD74, IQGAP1, ITGAM, SLC7A7, CD97, SLC11A1, TNFRSF1B, PROCR, IL4R, RRAS, SHC1, IL13RA1, PLXND1, SELPLG, EHD2, SYK, CSF1R, TES, F11R, LAIR1, TGFBR2, AXL, MYH9, CD164, HLA-E, HLA-F, SLC16A3, EPB41L3, CYBA, TNS3, CORO1A, CD37, SLC16A7, ITGA5, HSPB1, HLA-DPA1, MOSPD2, CTSB, FCGR2A, TRIP6, ADAM12	101	3777	12782	1.60832	0.00422565
GOTERM_CC_FAT	GO:0031226~intrinsic to plasma membrane	23	1.96078	0.00014193	TGFBR2, AXL, TLR2, ITGB2, BDKRB2, MYH9, CD164, ITGAM, SLC7A7, SLC16A3, CD97, SLC11A1, CYBA, CD37, SLC16A7, PROCR, ITGA5, IL4R, HLA-DPA1, IL13RA1, TRIP6, SELPLG, CSF1R	101	1215	12782	2.39568	0.00427271
SP_PIR_KEYWORDS	transmembrane	48	4.09207	0.000185378	GALNT2, ENPP4, TLR2, FPR1, MFSD1, ITGB2, CDCP1, BDKRB2, FXYD5, CD74, ITGAM, SLC7A7, CD97, SLC11A1, TNFRSF1B, PROCR, C11ORF9, IL4R, PIGB, SLC39A8, IL13RA1, PLXND1, KIAA0247, SELPLG, B4GALT5, CSF1R, SOAT1, LAIR1, F11R, GIMAP5, TBXAS1, TGFBR2, AXL, CLIC2, CD164, HLA-E, HLA-F, SLC16A3, CD37, ITGA5, HLA-DPA1, MOSPD2, FCGR2A, BTN3A3, ADAM12, SLC15A3, C11ORF75, SSR3	114	4973	19235	1.62858	0.00540813
SP_PIR_KEYWORDS	zymogen	8	0.682012	0.000216061	CTSZ, TPP1, HEXB, CTSA, PGCP, CTSB, ADAM12, MAN2B1	114	206	19235	6.55255	0.00560244
SP_PIR_KEYWORDS	membrane	56	4.77408	0.000254551	TLR2, CDCP1, IQGAP1, SLC7A7, CD97, PLOD3, IL4R, PIGB, RRAS, IL13RA1, LAIR1, F11R, CLIC2, HLA-E, CD164, HLA-F, CD37, HLA-DPA1, MOSPD2, BTN3A3, ADAM12, C11ORF75, GALNT2, LIMS1, ENPP4, FPR1, MFSD1, ITGB2, BDKRB2, FXYD5, CD74, ITGAM, SLC11A1, TNFRSF1B, PROCR, C11ORF9, SLC39A8, PLXND1, KIAA0247, EHD2, SELPLG, B4GALT5, CSF1R, SOAT1, GIMAP5, TBXAS1, TGFBR2, AXL, PLEKHA4, SLC16A3, CYBA, CORO1A, ITGA5, FC…	114	6256	19235	1.51035	0.00593954
UP_SEQ_FEATURE	topological domain:Cytoplasmic	38	3.23956	7.38003e-05	GALNT2, ENPP4, TLR2, FPR1, ITGB2, CDCP1, BDKRB2, FXYD5, CD74, ITGAM, CD97, SLC11A1, TNFRSF1B, PROCR, IL4R, SLC39A8, PLXND1, KIAA0247, IL13RA1, SELPLG, B4GALT5, CSF1R, LAIR1, F11R, GIMAP5, TGFBR2, AXL, CD164, HLA-E, HLA-F, SLC16A3, CD37, ITGA5, HLA-DPA1, FCGR2A, BTN3A3, ADAM12, SSR3	114	3374	19113	1.88826	0.00664959
GOTERM_BP_FAT	GO:0022610~biological adhesion	17	1.44928	2.71637e-05	F11R, LIMS1, IGFBP7, IL32, ITGB2, MYH9, CD164, CCL5, ITGAM, CD97, CORO1A, LGALS3BP, ITGA5, TRIP6, ADAM12, SELPLG, SYK	96	701	13528	3.41738	0.00685974
GOTERM_BP_FAT	GO:0002684~positive regulation of immune system process	10	0.852515	4.38028e-05	SLC11A1, CORO1A, CD37, GIMAP5, IL4R, TGFBR2, TLR2, IL13RA1, CD74, SYK	96	238	13528	5.92087	0.00789713
GOTERM_BP_FAT	GO:0007155~cell adhesion	17	1.44928	2.66952e-05	F11R, LIMS1, IGFBP7, IL32, ITGB2, MYH9, CD164, CCL5, ITGAM, CD97, CORO1A, LGALS3BP, ITGA5, TRIP6, ADAM12, SELPLG, SYK	96	700	13528	3.42226	0.00842018
GOTERM_BP_FAT	GO:0007159~leukocyte adhesion	5	0.426257	4.10632e-05	ITGA5, ITGB2, SELPLG, ITGAM, SYK	96	28	13528	25.1637	0.00863388
GOTERM_BP_FAT	GO:0051251~positive regulation of lymphocyte activation	7	0.59676	6.04388e-05	CORO1A, GIMAP5, IL4R, TGFBR2, IL13RA1, CD74, SYK	96	97	13528	10.1692	0.00952661
GOTERM_BP_FAT	GO:0045582~positive regulation of T cell differentiation	5	0.426257	7.0585e-05	GIMAP5, IL4R, TGFBR2, CD74, SYK	96	32	13528	22.0182	0.00988795
GOTERM_BP_FAT	GO:0009611~response to wounding	14	1.19352	8.13145e-05	F11R, TGFBR2, TGFB3, TLR2, ITGB2, BDKRB2, CCL5, CD97, SLC11A1, CYBA, TNFRSF1B, PROCR, ITGA5, CTSB	96	530	13528	3.72233	0.0102501
GOTERM_BP_FAT	GO:0045621~positive regulation of lymphocyte differentiation	5	0.426257	0.000101133	GIMAP5, IL4R, TGFBR2, CD74, SYK	96	35	13528	20.131	0.0106217
GOTERM_BP_FAT	GO:0006928~cell motion	14	1.19352	2.63777e-05	FPR1, ITGB2, MYH9, CCL5, ITGAM, CD97, ARPC1B, TNS3, CORO1A, ITGA5, HSPB1, SELPLG, SYK, ARHGDIB	96	475	13528	4.15333	0.0110785
GOTERM_BP_FAT	GO:0002696~positive regulation of leukocyte activation	7	0.59676	9.91866e-05	CORO1A, GIMAP5, IL4R, TGFBR2, IL13RA1, CD74, SYK	96	106	13528	9.30582	0.01136
GOTERM_BP_FAT	GO:0050867~positive regulation of cell activation	7	0.59676	0.000128001	CORO1A, GIMAP5, IL4R, TGFBR2, IL13RA1, CD74, SYK	96	111	13528	8.88664	0.011518
UP_SEQ_FEATURE	transmembrane region	48	4.09207	0.00015843	GALNT2, ENPP4, TLR2, FPR1, MFSD1, ITGB2, CDCP1, BDKRB2, FXYD5, CD74, ITGAM, SLC7A7, CD97, SLC11A1, TNFRSF1B, PROCR, C11ORF9, IL4R, PIGB, SLC39A8, IL13RA1, PLXND1, KIAA0247, SELPLG, B4GALT5, CSF1R, SOAT1, LAIR1, F11R, GIMAP5, TBXAS1, TGFBR2, AXL, CLIC2, CD164, HLA-E, HLA-F, SLC16A3, CD37, ITGA5, HLA-DPA1, MOSPD2, FCGR2A, BTN3A3, ADAM12, SLC15A3, C11ORF75, SSR3	114	4911	19113	1.63868	0.0118651
GOTERM_BP_FAT	GO:0030595~leukocyte chemotaxis	5	0.426257	0.000126204	CORO1A, ITGB2, CCL5, ITGAM, SYK	96	37	13528	19.0428	0.0122254
GOTERM_BP_FAT	GO:0060326~cell chemotaxis	5	0.426257	0.000155493	CORO1A, ITGB2, CCL5, ITGAM, SYK	96	39	13528	18.0662	0.0130491
GOTERM_BP_FAT	GO:0050870~positive regulation of T cell activation	6	0.511509	0.000191433	CORO1A, GIMAP5, IL4R, TGFBR2, CD74, SYK	96	76	13528	11.125	0.0150462
SP_PIR_KEYWORDS	cell adhesion	10	0.852515	0.000864466	CD97, LGALS3BP, ITGA5, IGFBP7, ITGB2, ADAM12, CD164, TRIP6, SELPLG, ITGAM	114	422	19235	3.9983	0.0182293
GOTERM_BP_FAT	GO:0045321~leukocyte activation	9	0.767263	0.000297456	SLC11A1, GIMAP5, TGFBR2, TLR2, MYO1F, MYH9, CD74, ITGAM, SYK	96	242	13528	5.2407	0.0196431
GOTERM_BP_FAT	GO:0002274~myeloid leukocyte activation	5	0.426257	0.000297131	SLC11A1, GIMAP5, TGFBR2, TLR2, MYO1F	96	46	13528	15.317	0.0207006
GOTERM_BP_FAT	GO:0006952~defense response	14	1.19352	0.000352045	F11R, TLR2, MYO1F, ITGB2, IL32, BDKRB2, CCL5, CD74, CD97, SLC11A1, CYBA, LGALS3BP, TNFRSF1B, CORO1A	96	615	13528	3.20786	0.0210197
GOTERM_BP_FAT	GO:0019882~antigen processing and presentation	6	0.511509	0.00028945	SLC11A1, PROCR, HLA-DPA1, HLA-E, CD74, HLA-F	96	83	13528	10.1867	0.0213445
GOTERM_BP_FAT	GO:0046638~positive regulation of alpha-beta T cell differentiation	4	0.341006	0.000350719	GIMAP5, IL4R, TGFBR2, SYK	96	20	13528	28.1833	0.0219769
KEGG_PATHWAY	hsa04810:Regulation of actin cytoskeleton	10	0.852515	0.00063822	ARPC1B, RAC2, LIMK2, ITGA5, RRAS, ITGB2, BDKRB2, MYH9, ITGAM, IQGAP1	59	215	5085	4.00867	0.0236566
GOTERM_BP_FAT	GO:0045580~regulation of T cell differentiation	5	0.426257	0.000442998	GIMAP5, IL4R, TGFBR2, CD74, SYK	96	51	13528	13.8154	0.0251955
KEGG_PATHWAY	hsa05416:Viral myocarditis	6	0.511509	0.00118779	RAC2, ITGB2, HLA-DPA1, MYH9, HLA-E, HLA-F	59	71	5085	7.28336	0.0292753
GOTERM_CC_FAT	GO:0008305~integrin complex	4	0.341006	0.00146464	ITGA5, ITGB2, MYH9, ITGAM	101	29	12782	17.4558	0.0326179
GOTERM_BP_FAT	GO:0051249~regulation of lymphocyte activation	7	0.59676	0.000605007	CORO1A, GIMAP5, IL4R, TGFBR2, IL13RA1, CD74, SYK	96	148	13528	6.66498	0.0327885
GOTERM_BP_FAT	GO:0016477~cell migration	9	0.767263	0.000711452	TNS3, CORO1A, ITGA5, ITGB2, MYH9, CCL5, SELPLG, ITGAM, SYK	96	276	13528	4.59511	0.0340874
GOTERM_BP_FAT	GO:0007167~enzyme linked receptor protein signaling pathway	10	0.852515	0.000660199	TXNIP, TWSG1, MYO1E, TGFBR2, TGFB3, AXL, SHC1, BDKRB2, CSF1R, SYK	96	342	13528	4.12037	0.0342637
GOTERM_BP_FAT	GO:0046637~regulation of alpha-beta T cell differentiation	4	0.341006	0.000689821	GIMAP5, IL4R, TGFBR2, SYK	96	25	13528	22.5467	0.0343677
GOTERM_BP_FAT	GO:0046635~positive regulation of alpha-beta T cell activation	4	0.341006	0.000775845	GIMAP5, IL4R, TGFBR2, SYK	96	26	13528	21.6795	0.0357661
SP_PIR_KEYWORDS	Secreted	21	1.79028	0.00187955	SCPEP1, GALNT2, TWSG1, LGALS1, IGFBP7, TGFB3, IL32, CDCP1, TCN2, CD164, CCL5, CALU, CD97, GPI, TNFRSF1B, LGALS3BP, IL4R, GRN, PGCP, ADAM12, IGFBP5	114	1689	19235	2.09786	0.0360209
SP_PIR_KEYWORDS	immune response	7	0.59676	0.00209372	LAIR1, IL4R, TLR2, HLA-DPA1, HLA-E, CD74, HLA-F	114	224	19235	5.27275	0.0370238
GOTERM_BP_FAT	GO:0001775~cell activation	9	0.767263	0.000917024	SLC11A1, GIMAP5, TGFBR2, TLR2, MYO1F, MYH9, CD74, ITGAM, SYK	96	287	13528	4.41899	0.0392901
GOTERM_BP_FAT	GO:0045619~regulation of lymphocyte differentiation	5	0.426257	0.000990292	GIMAP5, IL4R, TGFBR2, CD74, SYK	96	63	13528	11.1839	0.0396853
GOTERM_BP_FAT	GO:0048002~antigen processing and presentation of peptide antigen	4	0.341006	0.000967682	SLC11A1, HLA-E, CD74, HLA-F	96	28	13528	20.131	0.0400636
GOTERM_BP_FAT	GO:0006935~chemotaxis	7	0.59676	0.000910111	CORO1A, RAC2, FPR1, ITGB2, CCL5, ITGAM, SYK	96	160	13528	6.1651	0.040364
GOTERM_BP_FAT	GO:0042330~taxis	7	0.59676	0.000910111	CORO1A, RAC2, FPR1, ITGB2, CCL5, ITGAM, SYK	96	160	13528	6.1651	0.040364
GOTERM_BP_FAT	GO:0002694~regulation of leukocyte activation	7	0.59676	0.00110139	CORO1A, GIMAP5, IL4R, TGFBR2, IL13RA1, CD74, SYK	96	166	13528	5.94227	0.0426939
GOTERM_BP_FAT	GO:0007229~integrin-mediated signaling pathway	5	0.426257	0.00146842	ITGA5, ITGB2, MYH9, ITGAM, SYK	96	70	13528	10.0655	0.0490752
GOTERM_BP_FAT	GO:0050865~regulation of cell activation	7	0.59676	0.00144449	CORO1A, GIMAP5, IL4R, TGFBR2, IL13RA1, CD74, SYK	96	175	13528	5.63667	0.0496023
GOTERM_BP_FAT	GO:0030029~actin filament-based process	8	0.682012	0.00152509	EPB41L3, CORO1A, RAC2, MYO1E, MYH9, EHD2, FLNB, ARHGDIB	96	241	13528	4.67773	0.0496155
GOTERM_BP_FAT	GO:0048870~cell motility	9	0.767263	0.00141153	TNS3, CORO1A, ITGA5, ITGB2, MYH9, CCL5, SELPLG, ITGAM, SYK	96	307	13528	4.13111	0.0498482
GOTERM_BP_FAT	GO:0051674~localization of cell	9	0.767263	0.00141153	TNS3, CORO1A, ITGA5, ITGB2, MYH9, CCL5, SELPLG, ITGAM, SYK	96	307	13528	4.13111	0.0498482
GOTERM_BP_FAT	GO:0050863~regulation of T cell activation	6	0.511509	0.00138521	CORO1A, GIMAP5, IL4R, TGFBR2, CD74, SYK	96	117	13528	7.2265	0.0503436
GOTERM_BP_FAT	GO:0030097~hemopoiesis	8	0.682012	0.00135217	TWSG1, GIMAP5, MYO1E, TGFBR2, MYH9, CD164, CD74, SYK	96	236	13528	4.77684	0.050624
GOTERM_MF_FAT	GO:0019955~cytokine binding	7	0.59676	0.000181454	TNFRSF1B, IL4R, TGFBR2, TGFB3, IL13RA1, CD74, CSF1R	100	109	12983	8.33771	0.0521262
UP_SEQ_FEATURE	sequence variant	88	7.50213	0.000845467	CAST, SCPEP1, IGFBP7, HEXB, TGFB3, TLR2, CDCP1, IQGAP1, SLC7A7, SLA, FAH, CD97, TPP1, IL4R, PLOD3, PIGB, SHC1, MAN2B1, SYK, LAIR1, CTSZ, LIMK2, ARHGAP28, MYH9, HLA-E, TCN2, FLNB, HLA-F, EPB41L3, TNS3, ARPC1B, GRN, HSPB1, MOSPD2, HLA-DPA1, PGCP, CTSB, ADAM12, GALNT2, OSTF1, ENPP4, FPR1, RABGAP1L, MFSD1, ITGB2, IL32, CTSA, BDKRB2, FXYD5, CCL5, ITGAM, CALU, PLAGL1, SLC11A1, TNFRSF1B, RAC2, C11ORF9, …	114	11992	19113	1.23031	0.0531514
SP_PIR_KEYWORDS	polymorphism	83	7.07587	0.00366607	CAST, SCPEP1, IGFBP7, HEXB, TGFB3, TLR2, CDCP1, IQGAP1, SLC7A7, SLA, CD97, TPP1, IL4R, PLOD3, PIGB, SHC1, MAN2B1, SYK, LAIR1, CTSZ, LIMK2, ARHGAP28, MYH9, HLA-E, TCN2, FLNB, HLA-F, EPB41L3, TNS3, ARPC1B, GRN, MOSPD2, HLA-DPA1, CTSB, PGCP, ADAM12, GALNT2, OSTF1, ENPP4, FPR1, RABGAP1L, MFSD1, BDKRB2, FXYD5, CCL5, ITGAM, CALU, PLAGL1, SLC11A1, TNFRSF1B, RAC2, C11ORF9, PROCR, SLC39A8, PLXND1, EHD2, S…	114	11550	19235	1.2125	0.0595421
GOTERM_BP_FAT	GO:0042110~T cell activation	6	0.511509	0.00192174	SLC11A1, GIMAP5, MYH9, CD74, ITGAM, SYK	96	126	13528	6.71032	0.0605795
GOTERM_BP_FAT	GO:0046634~regulation of alpha-beta T cell activation	4	0.341006	0.00202518	GIMAP5, IL4R, TGFBR2, SYK	96	36	13528	15.6574	0.0607245
GOTERM_BP_FAT	GO:0006954~inflammatory response	9	0.767263	0.00201983	CD97, F11R, CYBA, SLC11A1, TNFRSF1B, TLR2, ITGB2, BDKRB2, CCL5	96	325	13528	3.90231	0.0620352
KEGG_PATHWAY	hsa04514:Cell adhesion molecules (CAMs)	7	0.59676	0.00365361	F11R, ITGB2, HLA-DPA1, HLA-E, SELPLG, ITGAM, HLA-F	59	132	5085	4.57049	0.0663285
GOTERM_BP_FAT	GO:0048534~hemopoietic or lymphoid organ development	8	0.682012	0.00234501	TWSG1, GIMAP5, MYO1E, TGFBR2, MYH9, CD164, CD74, SYK	96	260	13528	4.3359	0.0683743
GOTERM_BP_FAT	GO:0000187~activation of MAPK activity	5	0.426257	0.0026276	TGFB3, FPR1, SHC1, CD74, SYK	96	82	13528	8.59248	0.0729637
GOTERM_BP_FAT	GO:0007520~myoblast fusion	3	0.255754	0.00257549	CAST, MYH9, ADAM12	96	11	13528	38.4318	0.0731698
GOTERM_BP_FAT	GO:0048871~multicellular organismal homeostasis	5	0.426257	0.00299364	SLC11A1, CORO1A, GIMAP5, RAC2, TPP1	96	85	13528	8.28922	0.0809494
GOTERM_BP_FAT	GO:0007626~locomotory behavior	8	0.682012	0.00314094	CORO1A, RAC2, HEXB, FPR1, ITGB2, CCL5, ITGAM, SYK	96	274	13528	4.11436	0.0813085
GOTERM_BP_FAT	GO:0000768~syncytium formation by plasma membrane fusion	3	0.255754	0.00307648	CAST, MYH9, ADAM12	96	12	13528	35.2292	0.0813661
GOTERM_BP_FAT	GO:0007162~negative regulation of cell adhesion	4	0.341006	0.00337855	MYO1F, CD164, FXYD5, ARHGDIB	96	43	13528	13.1085	0.0821831
GOTERM_BP_FAT	GO:0042127~regulation of cell proliferation	14	1.19352	0.00331464	TXNIP, IGFBP7, TGFBR2, TGFB3, BDKRB2, CD164, TNS3, CORO1A, RAC2, GRN, SHC1, IL13RA1, SYK, IGFBP5	96	787	13528	2.50678	0.0822676
GOTERM_BP_FAT	GO:0016337~cell-cell adhesion	8	0.682012	0.00326971	LIMS1, ITGA5, ITGB2, MYH9, CD164, SELPLG, ITGAM, SYK	96	276	13528	4.08454	0.082817
GOTERM_BP_FAT	GO:0002520~immune system development	8	0.682012	0.00326971	TWSG1, GIMAP5, MYO1E, TGFBR2, MYH9, CD164, CD74, SYK	96	276	13528	4.08454	0.082817
GOTERM_BP_FAT	GO:0002699~positive regulation of immune effector process	4	0.341006	0.00360748	CD37, GIMAP5, IL13RA1, SYK	96	44	13528	12.8106	0.0858706
GOTERM_BP_FAT	GO:0006949~syncytium formation	3	0.255754	0.00420323	CAST, MYH9, ADAM12	96	14	13528	30.1964	0.0975385
GOTERM_CC_FAT	GO:0015629~actin cytoskeleton	8	0.682012	0.0051306	ARPC1B, CORO1A, MYO1E, CAPG, MYO1F, MYH9, FLNB, IQGAP1	101	269	12782	3.7637	0.0982768
SP_PIR_KEYWORDS	phosphoprotein	57	4.85934	0.00681321	CAST, CDCP1, IQGAP1, SLA, CD97, IL4R, PIGB, SHC1, SYK, RBMS1, LAIR1, F11R, LIMK2, ARHGAP28, MYH9, FLNB, EPB41L3, ARPC1B, TNS3, HSPB1, MOSPD2, ADAM12, OSTF1, ENPP4, UGDH, FPR1, RABGAP1L, ITGB2, BDKRB2, FXYD5, CD74, CALU, SLC11A1, TNFRSF1B, REXO2, SLC39A8, EHD2, SELPLG, CSF1R, ARHGDIB, TES, TXNIP, PHACTR2, LGALS1, MYO1E, TGFBR2, AXL, MYO1F, SLC16A3, CYBA, GPI, CORO1A, CAPG, PARP8, FCGR2A, TRIP6, SS…	114	7263	19235	1.32418	0.10116
GOTERM_BP_FAT	GO:0002702~positive regulation of production of molecular mediator of immune response	3	0.255754	0.00482779	CD37, GIMAP5, IL13RA1	96	15	13528	28.1833	0.107339
GOTERM_BP_FAT	GO:0045860~positive regulation of protein kinase activity	7	0.59676	0.00482098	SLC11A1, TGFBR2, TGFB3, FPR1, SHC1, CD74, SYK	96	223	13528	4.42339	0.109104
GOTERM_BP_FAT	GO:0030036~actin cytoskeleton organization	7	0.59676	0.00514158	EPB41L3, CORO1A, RAC2, MYH9, EHD2, FLNB, ARHGDIB	96	226	13528	4.36468	0.111969
GOTERM_BP_FAT	GO:0043406~positive regulation of MAP kinase activity	5	0.426257	0.00574053	TGFB3, FPR1, SHC1, CD74, SYK	96	102	13528	6.90768	0.112704
GOTERM_BP_FAT	GO:0014902~myotube differentiation	3	0.255754	0.00549236	CAST, MYH9, ADAM12	96	16	13528	26.4219	0.113355
GOTERM_BP_FAT	GO:0033674~positive regulation of kinase activity	7	0.59676	0.00571039	SLC11A1, TGFBR2, TGFB3, FPR1, SHC1, CD74, SYK	96	231	13528	4.2702	0.113904
GOTERM_BP_FAT	GO:0007610~behavior	10	0.852515	0.00563151	CORO1A, RAC2, ITGA5, HEXB, FPR1, ITGB2, MAN2B1, CCL5, ITGAM, SYK	96	469	13528	3.00462	0.114211
GOTERM_CC_FAT	GO:0005912~adherens junction	6	0.511509	0.00735085	TNS3, LIMS1, ITGA5, MYH9, TRIP6, TES	101	155	12782	4.89888	0.114322
GOTERM_BP_FAT	GO:0045597~positive regulation of cell differentiation	7	0.59676	0.0054776	GIMAP5, IL4R, TGFBR2, TGFB3, CCL5, CD74, SYK	96	229	13528	4.3075	0.114932
GOTERM_BP_FAT	GO:0042325~regulation of phosphorylation	10	0.852515	0.00540476	SLC11A1, LIMK2, TGFBR2, TGFB3, FPR1, ITGB2, SHC1, BDKRB2, CD74, SYK	96	466	13528	3.02396	0.115395
GOTERM_CC_FAT	GO:0030055~cell-substrate junction	5	0.426257	0.0115051	TNS3, LIMS1, ITGA5, TRIP6, TES	101	112	12782	5.64975	0.115918
SP_PIR_KEYWORDS	LIM domain	4	0.341006	0.00844474	LIMS1, LIMK2, TRIP6, TES	114	71	19235	9.50581	0.116646
GOTERM_MF_FAT	GO:0003779~actin binding	10	0.852515	0.000846834	EPB41L3, ARPC1B, CORO1A, PHACTR2, MYO1E, CAPG, MYO1F, MYH9, FXYD5, FLNB	100	326	12983	3.98252	0.117469
GOTERM_CC_FAT	GO:0000267~cell fraction	17	1.44928	0.00965716	SOAT1, TBXAS1, LIMK2, HEXB, CCL5, SLC16A3, TNFRSF1B, SLC16A7, RAC2, TPP1, ITGA5, HSPB1, CTSB, MAN2B1, EHD2, SELPLG, SSR3	101	1083	12782	1.98654	0.117909
GOTERM_CC_FAT	GO:0005925~focal adhesion	5	0.426257	0.00835039	TNS3, LIMS1, ITGA5, TRIP6, TES	101	102	12782	6.20365	0.118809
GOTERM_CC_FAT	GO:0070161~anchoring junction	6	0.511509	0.0112262	TNS3, LIMS1, ITGA5, MYH9, TRIP6, TES	101	172	12782	4.41469	0.119895
GOTERM_CC_FAT	GO:0005615~extracellular space	13	1.10827	0.0070834	TWSG1, IGFBP7, LGALS1, TGFB3, IL32, TCN2, CCL5, CD97, GPI, LGALS3BP, GRN, PGCP, IGFBP5	101	685	12782	2.40176	0.120732
GOTERM_CC_FAT	GO:0009897~external side of plasma membrane	6	0.511509	0.0107105	ITGA5, TGFBR2, TLR2, CTSB, CD74, ITGAM	101	170	12782	4.46663	0.121849
GOTERM_CC_FAT	GO:0005924~cell-substrate adherens junction	5	0.426257	0.00953367	TNS3, LIMS1, ITGA5, TRIP6, TES	101	106	12782	5.96955	0.124863
GOTERM_BP_FAT	GO:0051174~regulation of phosphorus metabolic process	10	0.852515	0.00696839	SLC11A1, LIMK2, TGFBR2, TGFB3, FPR1, ITGB2, SHC1, BDKRB2, CD74, SYK	96	485	13528	2.9055	0.12928
GOTERM_BP_FAT	GO:0019220~regulation of phosphate metabolic process	10	0.852515	0.00696839	SLC11A1, LIMK2, TGFBR2, TGFB3, FPR1, ITGB2, SHC1, BDKRB2, CD74, SYK	96	485	13528	2.9055	0.12928
GOTERM_BP_FAT	GO:0030593~neutrophil chemotaxis	3	0.255754	0.00693919	ITGB2, ITGAM, SYK	96	18	13528	23.4861	0.130678
GOTERM_BP_FAT	GO:0051347~positive regulation of transferase activity	7	0.59676	0.00684848	SLC11A1, TGFBR2, TGFB3, FPR1, SHC1, CD74, SYK	96	240	13528	4.11007	0.131018
SP_PIR_KEYWORDS	receptor	18	1.53453	0.0109179	F11R, LAIR1, TGFBR2, FPR1, AXL, TLR2, ITGB2, BDKRB2, ITGAM, CD97, TNFRSF1B, PROCR, ITGA5, IL4R, FCGR2A, PLXND1, IL13RA1, CSF1R	114	1583	19235	1.91858	0.140245
SP_PIR_KEYWORDS	coenzyme A	3	0.255754	0.0117042	SAT1, SOAT1, ENPP4	114	28	19235	18.078	0.141915
KEGG_PATHWAY	hsa04640:Hematopoietic cell lineage	5	0.426257	0.0161768	CD37, ITGA5, IL4R, ITGAM, CSF1R	59	86	5085	5.01084	0.160324
KEGG_PATHWAY	hsa04612:Antigen processing and presentation	5	0.426257	0.014355	HLA-DPA1, CTSB, HLA-E, CD74, HLA-F	59	83	5085	5.19195	0.165345
UP_SEQ_FEATURE	domain:LIM zinc-binding 1	4	0.341006	0.00322225	LIMS1, LIMK2, TRIP6, TES	114	50	19113	13.4126	0.166691
UP_SEQ_FEATURE	domain:LIM zinc-binding 2	4	0.341006	0.00322225	LIMS1, LIMK2, TRIP6, TES	114	50	19113	13.4126	0.166691
GOTERM_BP_FAT	GO:0046849~bone remodeling	3	0.255754	0.00939517	RAC2, TPP1, TGFB3	96	21	13528	20.131	0.168064
SP_PIR_KEYWORDS	carboxypeptidase	3	0.255754	0.0151258	SCPEP1, CTSA, PGCP	114	32	19235	15.8183	0.171144
GOTERM_CC_FAT	GO:0009986~cell surface	8	0.682012	0.0192883	ITGA5, TGFBR2, TLR2, TGFB3, HSPB1, CTSB, CD74, ITGAM	101	348	12782	2.9093	0.177864
GOTERM_CC_FAT	GO:0016021~integral to membrane	53	4.51833	0.0208107	TLR2, CDCP1, SLC7A7, CD97, IL4R, PIGB, IL13RA1, LAIR1, F11R, CLIC2, MYH9, HLA-E, CD164, FLNB, HLA-F, CD37, HLA-DPA1, MOSPD2, BTN3A3, ADAM12, C11ORF75, GALNT2, ENPP4, FPR1, MFSD1, ITGB2, BDKRB2, FXYD5, CD74, ITGAM, SLC11A1, TNFRSF1B, PROCR, C11ORF9, SLC39A8, PLXND1, KIAA0247, SELPLG, B4GALT5, CSF1R, SOAT1, TBXAS1, GIMAP5, TGFBR2, AXL, SLC16A3, CYBA, SLC16A7, ITGA5, FCGR2A, TRIP6, SLC15A3, SSR3	101	5297	12782	1.26626	0.181548
SP_PIR_KEYWORDS	transforming protein	3	0.255754	0.0169784	RAC2, AXL, RRAS	114	34	19235	14.8878	0.181558
KEGG_PATHWAY	hsa00520:Amino sugar and nucleotide sugar metabolism	4	0.341006	0.0133955	GPI, UAP1, HEXB, UGDH	59	44	5085	7.83513	0.183142
KEGG_PATHWAY	hsa04666:Fc gamma R-mediated phagocytosis	5	0.426257	0.0224926	ARPC1B, RAC2, LIMK2, FCGR2A, SYK	59	95	5085	4.53613	0.192067
GOTERM_BP_FAT	GO:0046649~lymphocyte activation	6	0.511509	0.0130579	SLC11A1, GIMAP5, MYH9, CD74, ITGAM, SYK	96	199	13528	4.24874	0.223006
GOTERM_BP_FAT	GO:0002521~leukocyte differentiation	5	0.426257	0.0135777	GIMAP5, TGFBR2, MYH9, CD74, SYK	96	131	13528	5.3785	0.224864
GOTERM_BP_FAT	GO:0051094~positive regulation of developmental process	7	0.59676	0.0135139	GIMAP5, IL4R, TGFBR2, TGFB3, CCL5, CD74, SYK	96	278	13528	3.54826	0.22686
GOTERM_CC_FAT	GO:0016023~cytoplasmic membrane-bounded vesicle	10	0.852515	0.0281262	CYBA, SLC11A1, CORO1A, TPP1, HEXB, CAPG, TGFB3, CTSB, ARHGDIB, CALU	101	550	12782	2.30099	0.227552
GOTERM_BP_FAT	GO:0032796~uropod organization	2	0.170503	0.0139961	CORO1A, MYH9	96	2	13528	140.917	0.228036
GOTERM_MF_FAT	GO:0046983~protein dimerization activity	12	1.02302	0.00275088	CYBA, SLC11A1, CORO1A, LIMK2, LGALS1, HEXB, TGFBR2, TGFB3, BDKRB2, MYH9, ITGAM, CSF1R	100	542	12983	2.87446	0.237289
SP_PIR_KEYWORDS	integrin	3	0.255754	0.0241665	ITGA5, ITGB2, ITGAM	114	41	19235	12.346	0.238596
GOTERM_CC_FAT	GO:0031988~membrane-bounded vesicle	10	0.852515	0.0335921	CYBA, SLC11A1, CORO1A, TPP1, HEXB, CAPG, TGFB3, CTSB, ARHGDIB, CALU	101	568	12782	2.22807	0.245062
GOTERM_CC_FAT	GO:0005768~endosome	7	0.59676	0.0370317	SLC11A1, FPR1, BDKRB2, CD164, EHD2, CD74, SLA	101	315	12782	2.81232	0.247672
GOTERM_CC_FAT	GO:0042470~melanosome	4	0.341006	0.0325257	TPP1, CAPG, CTSB, CALU	101	89	12782	5.68784	0.247987
GOTERM_CC_FAT	GO:0048770~pigment granule	4	0.341006	0.0325257	TPP1, CAPG, CTSB, CALU	101	89	12782	5.68784	0.247987
GOTERM_CC_FAT	GO:0005625~soluble fraction	7	0.59676	0.0360721	LIMK2, TPP1, HEXB, HSPB1, CTSB, MAN2B1, CCL5	101	313	12782	2.83029	0.251076
GOTERM_CC_FAT	GO:0031224~intrinsic to membrane	53	4.51833	0.0413361	TLR2, CDCP1, SLC7A7, CD97, IL4R, PIGB, IL13RA1, LAIR1, F11R, CLIC2, MYH9, HLA-E, CD164, FLNB, HLA-F, CD37, HLA-DPA1, MOSPD2, BTN3A3, ADAM12, C11ORF75, GALNT2, ENPP4, FPR1, MFSD1, ITGB2, BDKRB2, FXYD5, CD74, ITGAM, SLC11A1, TNFRSF1B, PROCR, C11ORF9, SLC39A8, PLXND1, KIAA0247, SELPLG, B4GALT5, CSF1R, SOAT1, TBXAS1, GIMAP5, TGFBR2, AXL, SLC16A3, CYBA, SLC16A7, ITGA5, FCGR2A, TRIP6, SLC15A3, SSR3	101	5485	12782	1.22286	0.254634
SP_PIR_KEYWORDS	SH2 domain	4	0.341006	0.0277043	TNS3, SHC1, SLA, SYK	114	111	19235	6.08029	0.258316
GOTERM_CC_FAT	GO:0005884~actin filament	3	0.255754	0.040781	CORO1A, MYO1F, IQGAP1	101	41	12782	9.26008	0.260251
UP_SEQ_FEATURE	region of interest:Alpha-1	3	0.255754	0.00614049	HLA-DPA1, HLA-E, HLA-F	114	20	19113	25.1487	0.266069
UP_SEQ_FEATURE	region of interest:Alpha-2	3	0.255754	0.00614049	HLA-DPA1, HLA-E, HLA-F	114	20	19113	25.1487	0.266069
GOTERM_CC_FAT	GO:0030670~phagocytic vesicle membrane	2	0.170503	0.0460413	SLC11A1, CORO1A	101	6	12782	42.1848	0.270925
GOTERM_BP_FAT	GO:0043405~regulation of MAP kinase activity	5	0.426257	0.0173455	TGFB3, FPR1, SHC1, CD74, SYK	96	141	13528	4.99704	0.271456
SP_PIR_KEYWORDS	calmodulin-binding	4	0.341006	0.033784	MYO1E, MYO1F, MYH9, IQGAP1	114	120	19235	5.62427	0.275072
SP_PIR_KEYWORDS	myosin	3	0.255754	0.0361825	MYO1E, MYO1F, MYH9	114	51	19235	9.92518	0.282283
SP_PIR_KEYWORDS	autophosphorylation	3	0.255754	0.0336258	AXL, CSF1R, SYK	114	49	19235	10.3303	0.283581
SP_PIR_KEYWORDS	tyrosine-specific protein kinase	3	0.255754	0.0323752	AXL, CSF1R, SYK	114	48	19235	10.5455	0.284542
GOTERM_BP_FAT	GO:0007566~embryo implantation	3	0.255754	0.0186825	IGFBP7, GRN, TGFBR2	96	30	13528	14.0917	0.285766
GOTERM_BP_FAT	GO:0046942~carboxylic acid transport	5	0.426257	0.0198907	SLC16A3, SLC11A1, SLC16A7, BDKRB2, SLC7A7	96	147	13528	4.79308	0.294399
GOTERM_BP_FAT	GO:0015849~organic acid transport	5	0.426257	0.0203361	SLC16A3, SLC11A1, SLC16A7, BDKRB2, SLC7A7	96	148	13528	4.7607	0.296562
GOTERM_BP_FAT	GO:0046456~icosanoid biosynthetic process	3	0.255754	0.0198808	TBXAS1, CD74, SYK	96	31	13528	13.6371	0.297683
GOTERM_BP_FAT	GO:0007169~transmembrane receptor protein tyrosine kinase signaling pathway	6	0.511509	0.0207225	TXNIP, MYO1E, AXL, SHC1, BDKRB2, CSF1R	96	224	13528	3.77455	0.29795
UP_SEQ_FEATURE	mutagenesis site	22	1.87553	0.00821571	SAT1, LAIR1, LIMS1, LIMK2, TGFBR2, AXL, TLR2, CDCP1, CTSA, C9ORF95, IQGAP1, FAH, SLA, GPI, CYBA, RAC2, TPP1, IL4R, REXO2, TRIP6, SELPLG, TES	114	2045	19113	1.80365	0.311255
GOTERM_CC_FAT	GO:0030863~cortical cytoskeleton	3	0.255754	0.0561954	CORO1A, MYO1F, MYH9	101	49	12782	7.74823	0.311933
GOTERM_MF_FAT	GO:0046982~protein heterodimerization activity	7	0.59676	0.0051283	CYBA, LIMK2, HEXB, TGFBR2, TGFB3, BDKRB2, ITGAM	100	208	12983	4.36928	0.315581
KEGG_PATHWAY	hsa04670:Leukocyte transendothelial migration	5	0.426257	0.0447682	F11R, CYBA, RAC2, ITGB2, ITGAM	59	118	5085	3.65197	0.317284
SP_PIR_KEYWORDS	disease mutation	16	1.36402	0.0456689	TBXAS1, HEXB, TGFBR2, CTSA, ITGB2, MYH9, FLNB, FAH, SLC7A7, GPI, CYBA, RAC2, TPP1, PLOD3, HSPB1, MAN2B1	114	1591	19235	1.69683	0.323384
UP_SEQ_FEATURE	domain:LIM zinc-binding 3	3	0.255754	0.00951091	LIMS1, TRIP6, TES	114	25	19113	20.1189	0.324757
GOTERM_BP_FAT	GO:0002573~myeloid leukocyte differentiation	3	0.255754	0.0236621	GIMAP5, TGFBR2, MYH9	96	34	13528	12.4338	0.329153
GOTERM_BP_FAT	GO:0006636~unsaturated fatty acid biosynthetic process	3	0.255754	0.0236621	TBXAS1, CD74, SYK	96	34	13528	12.4338	0.329153
SP_PIR_KEYWORDS	duplication	5	0.426257	0.0455824	TNFRSF1B, ITGA5, AXL, ITGB2, IQGAP1	114	228	19235	3.70018	0.332579
GOTERM_BP_FAT	GO:0032956~regulation of actin cytoskeleton organization	4	0.341006	0.0246804	ARPC1B, CORO1A, CAPG, MYO1F	96	89	13528	6.33333	0.337146
GOTERM_CC_FAT	GO:0031410~cytoplasmic vesicle	10	0.852515	0.0637681	CYBA, SLC11A1, CORO1A, TPP1, HEXB, CAPG, TGFB3, CTSB, ARHGDIB, CALU	101	642	12782	1.97125	0.337184
GOTERM_MF_FAT	GO:0019838~growth factor binding	5	0.426257	0.00845199	IGFBP7, IL4R, TGFBR2, TGFB3, IGFBP5	100	105	12983	6.18238	0.341191
UP_SEQ_FEATURE	region of interest:Actin-binding	3	0.255754	0.0110427	MYO1E, MYO1F, MYH9	114	27	19113	18.6287	0.341805
GOTERM_BP_FAT	GO:0008284~positive regulation of cell proliferation	8	0.682012	0.0263982	TNS3, CORO1A, RAC2, GRN, TGFBR2, SHC1, IL13RA1, SYK	96	414	13528	2.72303	0.348881
GOTERM_MF_FAT	GO:0000146~microfilament motor activity	3	0.255754	0.00726575	MYO1E, MYO1F, MYH9	100	17	12983	22.9112	0.34965
GOTERM_CC_FAT	GO:0045335~phagocytic vesicle	2	0.170503	0.0755631	SLC11A1, CORO1A	101	10	12782	25.3109	0.350107
GOTERM_CC_FAT	GO:0001772~immunological synapse	2	0.170503	0.0755631	CORO1A, MYH9	101	10	12782	25.3109	0.350107
GOTERM_BP_FAT	GO:0032970~regulation of actin filament-based process	4	0.341006	0.0268871	ARPC1B, CORO1A, CAPG, MYO1F	96	92	13528	6.12681	0.350566
GOTERM_BP_FAT	GO:0002263~cell activation during immune response	3	0.255754	0.0263335	SLC11A1, TLR2, MYO1F	96	36	13528	11.7431	0.351753
GOTERM_BP_FAT	GO:0002366~leukocyte activation during immune response	3	0.255754	0.0263335	SLC11A1, TLR2, MYO1F	96	36	13528	11.7431	0.351753
GOTERM_CC_FAT	GO:0031982~vesicle	10	0.852515	0.0786632	CYBA, SLC11A1, CORO1A, TPP1, HEXB, CAPG, TGFB3, CTSB, ARHGDIB, CALU	101	670	12782	1.88887	0.353482
GOTERM_CC_FAT	GO:0016323~basolateral plasma membrane	5	0.426257	0.0748856	TNS3, LIMS1, ITGA5, TRIP6, TES	101	203	12782	3.1171	0.356138
GOTERM_CC_FAT	GO:0042611~MHC protein complex	3	0.255754	0.0732932	HLA-DPA1, HLA-E, HLA-F	101	57	12782	6.66076	0.358811
GOTERM_CC_FAT	GO:0044421~extracellular region part	13	1.10827	0.071103	TWSG1, IGFBP7, LGALS1, TGFB3, IL32, TCN2, CCL5, CD97, GPI, LGALS3BP, GRN, PGCP, IGFBP5	101	960	12782	1.71376	0.359178
KEGG_PATHWAY	hsa04650:Natural killer cell mediated cytotoxicity	5	0.426257	0.0641898	RAC2, ITGB2, SHC1, HLA-E, SYK	59	133	5085	3.24009	0.363859
GOTERM_BP_FAT	GO:0051240~positive regulation of multicellular organismal process	6	0.511509	0.0286302	SLC11A1, GIMAP5, C11ORF9, TLR2, TGFB3, CCL5	96	244	13528	3.46516	0.365152
KEGG_PATHWAY	hsa04060:Cytokine-cytokine receptor interaction	7	0.59676	0.0762527	TNFRSF1B, IL4R, TGFBR2, TGFB3, IL13RA1, CCL5, CSF1R	59	262	5085	2.30269	0.367197
KEGG_PATHWAY	hsa04940:Type I diabetes mellitus	3	0.255754	0.082368	HLA-DPA1, HLA-E, HLA-F	59	42	5085	6.15617	0.369028
KEGG_PATHWAY	hsa05332:Graft-versus-host disease	3	0.255754	0.0724236	HLA-DPA1, HLA-E, HLA-F	59	39	5085	6.62973	0.37492
SP_PIR_KEYWORDS	manganese	4	0.341006	0.0604494	GALNT2, REXO2, TGFBR2, B4GALT5	114	152	19235	4.44021	0.375416
SP_PIR_KEYWORDS	Immunoglobulin domain	7	0.59676	0.0588776	F11R, LAIR1, IGFBP7, AXL, FCGR2A, BTN3A3, CSF1R	114	470	19235	2.51297	0.37707
SMART	SM00462:PTB	3	0.255754	0.0275536	TNS3, RABGAP1L, SHC1	63	38	9079	11.3772	0.378106
SMART	SM00242:MYSc	3	0.255754	0.0275536	MYO1E, MYO1F, MYH9	63	38	9079	11.3772	0.378106
SP_PIR_KEYWORDS	methylated carboxyl end	2	0.170503	0.0572311	RAC2, RRAS	114	10	19235	33.7456	0.378449
SP_PIR_KEYWORDS	mhc i	2	0.170503	0.0572311	HLA-E, HLA-F	114	10	19235	33.7456	0.378449
KEGG_PATHWAY	hsa05330:Allograft rejection	3	0.255754	0.062912	HLA-DPA1, HLA-E, HLA-F	59	36	5085	7.1822	0.385739
GOTERM_BP_FAT	GO:0030334~regulation of cell migration	5	0.426257	0.031132	CORO1A, RRAS, MYO1F, TRIP6, IGFBP5	96	169	13528	4.16913	0.386561
GOTERM_BP_FAT	GO:0031589~cell-substrate adhesion	4	0.341006	0.0316073	CORO1A, LIMS1, ITGB2, TRIP6	96	98	13528	5.7517	0.387543
GOTERM_CC_FAT	GO:0031252~cell leading edge	4	0.341006	0.0938007	CORO1A, ITGA5, MYH9, IQGAP1	101	138	12782	3.66825	0.390561
GOTERM_CC_FAT	GO:0016459~myosin complex	3	0.255754	0.0918165	MYO1E, MYO1F, MYH9	101	65	12782	5.84097	0.392288
SP_PIR_KEYWORDS	Protease	7	0.59676	0.0659066	SCPEP1, CTSZ, TPP1, CTSA, PGCP, CTSB, ADAM12	114	484	19235	2.44028	0.392594
GOTERM_CC_FAT	GO:0005576~extracellular region	22	1.87553	0.0970691	SCPEP1, GALNT2, TWSG1, LGALS1, IGFBP7, TGFB3, IL32, CDCP1, TCN2, CD164, CCL5, CALU, CD97, GPI, TNFRSF1B, LGALS3BP, IL4R, GRN, PGCP, CTSB, ADAM12, IGFBP5	101	2010	12782	1.38517	0.393171
SP_PIR_KEYWORDS	macrophage	2	0.170503	0.0682816	SOAT1, SLC11A1	114	12	19235	28.1213	0.39438
SP_PIR_KEYWORDS	intramolecular oxidoreductase	2	0.170503	0.0682816	GPI, TBXAS1	114	12	19235	28.1213	0.39438
GOTERM_BP_FAT	GO:0002700~regulation of production of molecular mediator of immune response	3	0.255754	0.0335118	CD37, GIMAP5, IL13RA1	96	41	13528	10.311	0.401981
GOTERM_BP_FAT	GO:0045859~regulation of protein kinase activity	7	0.59676	0.0344734	SLC11A1, TGFBR2, TGFB3, FPR1, SHC1, CD74, SYK	96	345	13528	2.85918	0.403599
GOTERM_BP_FAT	GO:0002697~regulation of immune effector process	4	0.341006	0.0341198	CD37, GIMAP5, IL13RA1, SYK	96	101	13528	5.58086	0.40397
GOTERM_BP_FAT	GO:0050868~negative regulation of T cell activation	3	0.255754	0.0350294	GIMAP5, IL4R, CD74	96	42	13528	10.0655	0.405057
GOTERM_BP_FAT	GO:0006090~pyruvate metabolic process	3	0.255754	0.0350294	SLC16A3, GPI, SLC16A7	96	42	13528	10.0655	0.405057
SP_PIR_KEYWORDS	membrane protein	3	0.255754	0.0753289	CYBA, RAC2, RRAS	114	77	19235	6.57382	0.416672
SMART	SM00252:SH2	4	0.341006	0.0399762	TNS3, SHC1, SLA, SYK	63	111	9079	5.19319	0.425837
SMART	SM00409:IG	7	0.59676	0.024543	F11R, LAIR1, IGFBP7, AXL, FCGR2A, BTN3A3, CSF1R	63	330	9079	3.0569	0.430643
GOTERM_BP_FAT	GO:0043549~regulation of kinase activity	7	0.59676	0.0396827	SLC11A1, TGFBR2, TGFB3, FPR1, SHC1, CD74, SYK	96	357	13528	2.76307	0.441771
GOTERM_BP_FAT	GO:0000165~MAPKKK cascade	5	0.426257	0.040571	TGFB3, FPR1, SHC1, CD74, SYK	96	184	13528	3.82926	0.445456
GOTERM_BP_FAT	GO:0002639~positive regulation of immunoglobulin production	2	0.170503	0.0414095	CD37, IL13RA1	96	6	13528	46.9722	0.44864
GOTERM_BP_FAT	GO:0046645~positive regulation of gamma-delta T cell activation	2	0.170503	0.0414095	GIMAP5, SYK	96	6	13528	46.9722	0.44864
GOTERM_BP_FAT	GO:0045588~positive regulation of gamma-delta T cell differentiation	2	0.170503	0.0414095	GIMAP5, SYK	96	6	13528	46.9722	0.44864
GOTERM_BP_FAT	GO:0045586~regulation of gamma-delta T cell differentiation	2	0.170503	0.0414095	GIMAP5, SYK	96	6	13528	46.9722	0.44864
GOTERM_BP_FAT	GO:0046643~regulation of gamma-delta T cell activation	2	0.170503	0.0414095	GIMAP5, SYK	96	6	13528	46.9722	0.44864
GOTERM_BP_FAT	GO:0007565~female pregnancy	4	0.341006	0.0422601	IGFBP7, GRN, TGFBR2, TGFB3	96	110	13528	5.12424	0.451838
SP_PIR_KEYWORDS	cytokine	4	0.341006	0.090898	GPI, GRN, IL32, CCL5	114	181	19235	3.7288	0.452666
GOTERM_BP_FAT	GO:0006690~icosanoid metabolic process	3	0.255754	0.0430035	TBXAS1, CD74, SYK	96	47	13528	8.99468	0.454113
SP_PIR_KEYWORDS	Growth factor binding	2	0.170503	0.0899988	IGFBP7, IGFBP5	114	16	19235	21.091	0.458283
GOTERM_MF_FAT	GO:0008092~cytoskeletal protein binding	10	0.852515	0.0146615	EPB41L3, ARPC1B, CORO1A, PHACTR2, MYO1E, CAPG, MYO1F, MYH9, FXYD5, FLNB	100	504	12983	2.57599	0.463373
GOTERM_BP_FAT	GO:0001503~ossification	4	0.341006	0.0471669	TWSG1, OSTF1, TGFB3, IGFBP5	96	115	13528	4.90145	0.464551
GOTERM_BP_FAT	GO:0002825~regulation of T-helper 1 type immune response	2	0.170503	0.0481442	SLC11A1, IL4R	96	7	13528	40.2619	0.464824
GOTERM_BP_FAT	GO:0051270~regulation of cell motion	5	0.426257	0.046936	CORO1A, RRAS, MYO1F, TRIP6, IGFBP5	96	193	13528	3.65069	0.466302
SP_PIR_KEYWORDS	cell membrane	19	1.61978	0.0897189	F11R, LAIR1, LIMS1, FPR1, CDCP1, BDKRB2, CD164, IQGAP1, CD74, SLC7A7, SLC16A3, CD97, TNFRSF1B, IL4R, RRAS, FCGR2A, PLXND1, ADAM12, EHD2	114	2194	19235	1.46118	0.466592
GOTERM_BP_FAT	GO:0015718~monocarboxylic acid transport	3	0.255754	0.0480812	SLC16A3, SLC16A7, BDKRB2	96	50	13528	8.455	0.467743
GOTERM_BP_FAT	GO:0040012~regulation of locomotion	5	0.426257	0.0462027	CORO1A, RRAS, MYO1F, TRIP6, IGFBP5	96	192	13528	3.6697	0.467881
GOTERM_BP_FAT	GO:0048545~response to steroid hormone stimulus	5	0.426257	0.0462027	TXNIP, IGFBP7, TGFBR2, TGFB3, CCL5	96	192	13528	3.6697	0.467881
GOTERM_BP_FAT	GO:0007243~protein kinase cascade	7	0.59676	0.0458663	TLR2, TGFB3, FPR1, SHC1, TRIP6, CD74, SYK	96	370	13528	2.66599	0.468922
GOTERM_BP_FAT	GO:0051338~regulation of transferase activity	7	0.59676	0.0468683	SLC11A1, TGFBR2, TGFB3, FPR1, SHC1, CD74, SYK	96	372	13528	2.65166	0.469284
GOTERM_BP_FAT	GO:0042060~wound healing	5	0.426257	0.045476	SLC11A1, PROCR, ITGA5, TGFBR2, TGFB3	96	191	13528	3.68892	0.469576
UP_SEQ_FEATURE	domain:Myosin head-like	3	0.255754	0.0181543	MYO1E, MYO1F, MYH9	114	35	19113	14.3707	0.471129
GOTERM_BP_FAT	GO:0033559~unsaturated fatty acid metabolic process	3	0.255754	0.0498203	TBXAS1, CD74, SYK	96	51	13528	8.28922	0.473276
GOTERM_BP_FAT	GO:0042692~muscle cell differentiation	4	0.341006	0.0534093	CAST, LGALS1, MYH9, ADAM12	96	121	13528	4.6584	0.494295
GOTERM_MF_FAT	GO:0030246~carbohydrate binding	8	0.682012	0.0184926	GALNT2, LGALS1, HEXB, TGFBR2, TLR2, MAN2B1, SELPLG, ITGAM	100	354	12983	2.93401	0.497569
GOTERM_BP_FAT	GO:0060348~bone development	4	0.341006	0.0555745	TWSG1, OSTF1, TGFB3, IGFBP5	96	123	13528	4.58266	0.498401
GOTERM_BP_FAT	GO:0007166~cell surface receptor linked signal transduction	20	1.70503	0.0561718	TXNIP, TWSG1, MYO1E, TGFBR2, FPR1, AXL, TGFB3, TLR2, ITGB2, BDKRB2, MYH9, CCL5, ITGAM, CD97, TNFRSF1B, ITGA5, SHC1, IL13RA1, CSF1R, SYK	96	1856	13528	1.5185	0.498929
UP_SEQ_FEATURE	region of interest:Connecting peptide	3	0.255754	0.0212051	HLA-DPA1, HLA-E, HLA-F	114	38	19113	13.2361	0.499419
GOTERM_BP_FAT	GO:0042981~regulation of apoptosis	11	0.937766	0.0552786	PLAGL1, TXNIP, SERPINB9, GIMAP5, LGALS1, TLR2, TGFB3, HSPB1, BDKRB2, CTSB, CD74	96	804	13528	1.92796	0.499812
GOTERM_MF_FAT	GO:0008238~exopeptidase activity	4	0.341006	0.0209497	SCPEP1, TPP1, CTSA, PGCP	100	77	12983	6.74442	0.500416
GOTERM_BP_FAT	GO:0002822~regulation of adaptive immune response based on somatic recombination of immune receptors built from immunoglobulin superfamily domains	3	0.255754	0.0569978	SLC11A1, GIMAP5, IL4R	96	55	13528	7.68636	0.500883
GOTERM_BP_FAT	GO:0030203~glycosaminoglycan metabolic process	3	0.255754	0.0569978	GNS, HEXB, UGDH	96	55	13528	7.68636	0.500883
GOTERM_BP_FAT	GO:0050671~positive regulation of lymphocyte proliferation	3	0.255754	0.0569978	CORO1A, IL13RA1, SYK	96	55	13528	7.68636	0.500883
GOTERM_BP_FAT	GO:0045088~regulation of innate immune response	3	0.255754	0.0551709	GIMAP5, TLR2, MYO1F	96	54	13528	7.8287	0.502468
GOTERM_BP_FAT	GO:0008360~regulation of cell shape	3	0.255754	0.0551709	CORO1A, ITGB2, MYH9	96	54	13528	7.8287	0.502468
GOTERM_BP_FAT	GO:0051250~negative regulation of lymphocyte activation	3	0.255754	0.0551709	GIMAP5, IL4R, CD74	96	54	13528	7.8287	0.502468
GOTERM_BP_FAT	GO:0030833~regulation of actin filament polymerization	3	0.255754	0.0551709	ARPC1B, CORO1A, CAPG	96	54	13528	7.8287	0.502468
GOTERM_BP_FAT	GO:0048771~tissue remodeling	3	0.255754	0.0588456	RAC2, TPP1, TGFB3	96	56	13528	7.54911	0.505874
GOTERM_BP_FAT	GO:0002819~regulation of adaptive immune response	3	0.255754	0.0588456	SLC11A1, GIMAP5, IL4R	96	56	13528	7.54911	0.505874
GOTERM_BP_FAT	GO:0070665~positive regulation of leukocyte proliferation	3	0.255754	0.0588456	CORO1A, IL13RA1, SYK	96	56	13528	7.54911	0.505874
GOTERM_BP_FAT	GO:0032946~positive regulation of mononuclear cell proliferation	3	0.255754	0.0588456	CORO1A, IL13RA1, SYK	96	56	13528	7.54911	0.505874
GOTERM_BP_FAT	GO:0043067~regulation of programmed cell death	11	0.937766	0.0583459	PLAGL1, TXNIP, SERPINB9, GIMAP5, LGALS1, TLR2, TGFB3, HSPB1, BDKRB2, CTSB, CD74	96	812	13528	1.90897	0.506022
GOTERM_BP_FAT	GO:0010941~regulation of cell death	11	0.937766	0.0595247	PLAGL1, TXNIP, SERPINB9, GIMAP5, LGALS1, TLR2, TGFB3, HSPB1, BDKRB2, CTSB, CD74	96	815	13528	1.90194	0.506814
GOTERM_BP_FAT	GO:0001773~myeloid dendritic cell activation	2	0.170503	0.0614734	GIMAP5, TGFBR2	96	9	13528	31.3148	0.509024
GOTERM_BP_FAT	GO:0043011~myeloid dendritic cell differentiation	2	0.170503	0.0614734	GIMAP5, TGFBR2	96	9	13528	31.3148	0.509024
UP_SEQ_FEATURE	domain:Ig-like C1-type	3	0.255754	0.0233489	HLA-DPA1, HLA-E, HLA-F	114	40	19113	12.5743	0.509301
GOTERM_MF_FAT	GO:0042802~identical protein binding	11	0.937766	0.0238739	SLC11A1, CORO1A, OSTF1, LGALS1, HEXB, TGFB3, HSPB1, MYH9, TRIP6, CD74, CSF1R	100	640	12983	2.23145	0.509742
GOTERM_BP_FAT	GO:0048514~blood vessel morphogenesis	5	0.426257	0.0612394	GPI, MYO1E, TGFBR2, MYH9, PLXND1	96	211	13528	3.33926	0.510755
GOTERM_BP_FAT	GO:0034330~cell junction organization	3	0.255754	0.060714	ITGA5, TGFB3, TRIP6	96	57	13528	7.41667	0.510781
GOTERM_BP_FAT	GO:0002695~negative regulation of leukocyte activation	3	0.255754	0.060714	GIMAP5, IL4R, CD74	96	57	13528	7.41667	0.510781
SMART	SM00015:IQ	4	0.341006	0.0214171	MYO1E, MYO1F, MYH9, IQGAP1	63	87	9079	6.6258	0.521017
GOTERM_BP_FAT	GO:0022604~regulation of cell morphogenesis	4	0.341006	0.0646469	CORO1A, TGFB3, ITGB2, MYH9	96	131	13528	4.3028	0.524203
GOTERM_BP_FAT	GO:0010033~response to organic substance	10	0.852515	0.0661758	TXNIP, SLC11A1, CORO1A, IGFBP7, TGFBR2, TLR2, TGFB3, HSPB1, SHC1, CCL5	96	721	13528	1.95446	0.529674
GOTERM_BP_FAT	GO:0050866~negative regulation of cell activation	3	0.255754	0.0683863	GIMAP5, IL4R, CD74	96	61	13528	6.93033	0.532613
GOTERM_BP_FAT	GO:0008064~regulation of actin polymerization or depolymerization	3	0.255754	0.0683863	ARPC1B, CORO1A, CAPG	96	61	13528	6.93033	0.532613
GOTERM_BP_FAT	GO:0002252~immune effector process	4	0.341006	0.0682151	SLC11A1, GALNT2, MYO1F, CD74	96	134	13528	4.20647	0.534716
GOTERM_BP_FAT	GO:0045123~cellular extravasation	2	0.170503	0.0680685	SELPLG, ITGAM	96	10	13528	28.1833	0.536981
GOTERM_BP_FAT	GO:0030832~regulation of actin filament length	3	0.255754	0.0723366	ARPC1B, CORO1A, CAPG	96	63	13528	6.71032	0.538582
GOTERM_BP_FAT	GO:0001894~tissue homeostasis	3	0.255754	0.0723366	CORO1A, RAC2, TPP1	96	63	13528	6.71032	0.538582
GOTERM_BP_FAT	GO:0051050~positive regulation of transport	5	0.426257	0.0719227	SLC11A1, GIMAP5, TGFB3, TRIP6, SYK	96	223	13528	3.15957	0.539369
GOTERM_BP_FAT	GO:0045087~innate immune response	4	0.341006	0.0731097	CYBA, SLC11A1, CORO1A, TLR2	96	138	13528	4.08454	0.539633
GOTERM_BP_FAT	GO:0005996~monosaccharide metabolic process	5	0.426257	0.070998	GPI, UAP1, HEXB, UGDH, MAN2B1	96	222	13528	3.1738	0.540475
GOTERM_BP_FAT	GO:0001501~skeletal system development	6	0.511509	0.0738667	TWSG1, OSTF1, HEXB, TGFBR2, TGFB3, IGFBP5	96	319	13528	2.65047	0.540588
GOTERM_BP_FAT	GO:0046457~prostanoid biosynthetic process	2	0.170503	0.0746178	TBXAS1, CD74	96	11	13528	25.6212	0.541499
GOTERM_BP_FAT	GO:0001516~prostaglandin biosynthetic process	2	0.170503	0.0746178	TBXAS1, CD74	96	11	13528	25.6212	0.541499
GOTERM_BP_FAT	GO:0043372~positive regulation of CD4-positive, alpha beta T cell differentiation	2	0.170503	0.0746178	GIMAP5, IL4R	96	11	13528	25.6212	0.541499
GOTERM_BP_FAT	GO:0045581~negative regulation of T cell differentiation	2	0.170503	0.0746178	IL4R, CD74	96	11	13528	25.6212	0.541499
GOTERM_BP_FAT	GO:0051493~regulation of cytoskeleton organization	4	0.341006	0.070643	ARPC1B, CORO1A, CAPG, MYO1F	96	136	13528	4.14461	0.541607
GOTERM_BP_FAT	GO:0030155~regulation of cell adhesion	4	0.341006	0.0718715	MYO1F, CD164, FXYD5, ARHGDIB	96	137	13528	4.11436	0.542046
GOTERM_BP_FAT	GO:0030217~T cell differentiation	3	0.255754	0.0763592	GIMAP5, CD74, SYK	96	65	13528	6.50385	0.547263
GOTERM_BP_FAT	GO:0006022~aminoglycan metabolic process	3	0.255754	0.0763592	GNS, HEXB, UGDH	96	65	13528	6.50385	0.547263
GOTERM_BP_FAT	GO:0044087~regulation of cellular component biogenesis	4	0.341006	0.0781576	ARPC1B, CORO1A, CAPG, TGFB3	96	142	13528	3.96948	0.553155
GOTERM_BP_FAT	GO:0006820~anion transport	4	0.341006	0.079443	SLC16A3, SLC11A1, SLC16A7, CLIC2	96	143	13528	3.94172	0.556477
GOTERM_BP_FAT	GO:0002920~regulation of humoral immune response	2	0.170503	0.0811216	CD37, GIMAP5	96	12	13528	23.4861	0.558795
GOTERM_BP_FAT	GO:0032271~regulation of protein polymerization	3	0.255754	0.0825228	ARPC1B, CORO1A, CAPG	96	68	13528	6.21691	0.559779
GOTERM_BP_FAT	GO:0042592~homeostatic process	10	0.852515	0.080793	SOAT1, SLC11A1, CORO1A, GIMAP5, C11ORF9, RAC2, TPP1, HEXB, BDKRB2, CCL5	96	751	13528	1.87639	0.560033
GOTERM_BP_FAT	GO:0050778~positive regulation of immune response	4	0.341006	0.0820417	SLC11A1, GIMAP5, TLR2, SYK	96	145	13528	3.88736	0.5603
GOTERM_BP_FAT	GO:0043009~chordate embryonic development	6	0.511509	0.0834477	LIMS1, MYO1E, GRN, TGFBR2, TGFB3, MYH9	96	331	13528	2.55438	0.561279
GOTERM_BP_FAT	GO:0007010~cytoskeleton organization	7	0.59676	0.0862115	EPB41L3, CORO1A, RAC2, MYH9, EHD2, FLNB, ARHGDIB	96	436	13528	2.26242	0.562963
GOTERM_BP_FAT	GO:0048584~positive regulation of response to stimulus	5	0.426257	0.0845019	SLC11A1, GIMAP5, TLR2, CCL5, SYK	96	236	13528	2.98552	0.563335
GOTERM_BP_FAT	GO:0001525~angiogenesis	4	0.341006	0.0860081	GPI, TGFBR2, MYH9, PLXND1	96	148	13528	3.80856	0.564701
GOTERM_BP_FAT	GO:0045730~respiratory burst	2	0.170503	0.0875801	CYBA, SLC11A1	96	13	13528	21.6795	0.566319
GOTERM_BP_FAT	GO:0030866~cortical actin cytoskeleton organization	2	0.170503	0.0875801	EPB41L3, EHD2	96	13	13528	21.6795	0.566319
GOTERM_BP_FAT	GO:0009792~embryonic development ending in birth or egg hatching	6	0.511509	0.085942	LIMS1, MYO1E, GRN, TGFBR2, TGFB3, MYH9	96	334	13528	2.53144	0.567063
GOTERM_BP_FAT	GO:0000041~transition metal ion transport	3	0.255754	0.0888339	SLC11A1, SLC39A8, TCN2	96	71	13528	5.95423	0.569118
GOTERM_BP_FAT	GO:0009225~nucleotide-sugar metabolic process	2	0.170503	0.0939937	UAP1, UGDH	96	14	13528	20.131	0.582961
GOTERM_BP_FAT	GO:0030865~cortical cytoskeleton organization	2	0.170503	0.0939937	EPB41L3, EHD2	96	14	13528	20.131	0.582961
GOTERM_BP_FAT	GO:0031349~positive regulation of defense response	3	0.255754	0.0931189	GIMAP5, TLR2, CCL5	96	73	13528	5.7911	0.584515
GOTERM_BP_FAT	GO:0001568~blood vessel development	5	0.426257	0.0938034	GPI, MYO1E, TGFBR2, MYH9, PLXND1	96	245	13528	2.87585	0.584744
GOTERM_MF_FAT	GO:0001948~glycoprotein binding	3	0.255754	0.0322443	LGALS1, ITGB2, ITGAM	100	37	12983	10.5268	0.584795
GOTERM_MF_FAT	GO:0004180~carboxypeptidase activity	3	0.255754	0.0322443	SCPEP1, CTSA, PGCP	100	37	12983	10.5268	0.584795
GOTERM_BP_FAT	GO:0016053~organic acid biosynthetic process	4	0.341006	0.0955736	TBXAS1, UGDH, CD74, SYK	96	155	13528	3.63656	0.586815
GOTERM_BP_FAT	GO:0046394~carboxylic acid biosynthetic process	4	0.341006	0.0955736	TBXAS1, UGDH, CD74, SYK	96	155	13528	3.63656	0.586815
GOTERM_BP_FAT	GO:0006468~protein amino acid phosphorylation	9	0.767263	0.096428	LIMK2, TGFBR2, TGFB3, AXL, FPR1, SHC1, CD74, CSF1R, SYK	96	667	13528	1.90142	0.587707
SMART	SM00132:LIM	4	0.341006	0.013439	LIMS1, LIMK2, TRIP6, TES	63	73	9079	7.8965	0.6015
SMART	SM00407:IGc1	3	0.255754	0.0784616	HLA-DPA1, HLA-E, HLA-F	63	68	9079	6.35784	0.603887
SMART	SM00645:Pept_C1	2	0.170503	0.091538	CTSZ, CTSB	63	14	9079	20.5873	0.606468
GOTERM_MF_FAT	GO:0015355~secondary active monocarboxylate transmembrane transporter activity	2	0.170503	0.0375554	SLC16A3, SLC16A7	100	5	12983	51.932	0.609771
GOTERM_MF_FAT	GO:0004185~serine-type carboxypeptidase activity	2	0.170503	0.0375554	SCPEP1, CTSA	100	5	12983	51.932	0.609771
INTERPRO	IPR003599:Immunoglobulin subtype	7	0.59676	0.0222105	F11R, LAIR1, IGFBP7, AXL, FCGR2A, BTN3A3, CSF1R	111	330	16659	3.18354	0.618105
INTERPRO	IPR006020:Phosphotyrosine interaction region	3	0.255754	0.026024	TNS3, RABGAP1L, SHC1	111	38	16659	11.8485	0.627986
INTERPRO	IPR001609:Myosin head, motor region	3	0.255754	0.026024	MYO1E, MYO1F, MYH9	111	38	16659	11.8485	0.627986
INTERPRO	IPR000048:IQ calmodulin-binding region	4	0.341006	0.0198869	MYO1E, MYO1F, MYH9, IQGAP1	111	87	16659	6.90028	0.633722
GOTERM_MF_FAT	GO:0070008~serine-type exopeptidase activity	2	0.170503	0.0448972	SCPEP1, CTSA	100	6	12983	43.2767	0.647393
INTERPRO	IPR004743:Monocarboxylate transporter	2	0.170503	0.0325859	SLC16A3, SLC16A7	111	5	16659	60.0324	0.668553
GOTERM_MF_FAT	GO:0034713~type I transforming growth factor beta receptor binding	2	0.170503	0.0521836	TGFBR2, TGFB3	100	7	12983	37.0943	0.676744
INTERPRO	IPR000980:SH2 motif	4	0.341006	0.0371837	TNS3, SHC1, SLA, SYK	111	111	16659	5.40833	0.679149
INTERPRO	IPR018202:Peptidase S10, serine carboxypeptidase, active site	2	0.170503	0.0196798	SCPEP1, CTSA	111	3	16659	100.054	0.696557
INTERPRO	IPR001563:Peptidase S10, serine carboxypeptidase	2	0.170503	0.0196798	SCPEP1, CTSA	111	3	16659	100.054	0.696557
GOTERM_MF_FAT	GO:0005529~sugar binding	5	0.426257	0.0618762	GALNT2, LGALS1, HEXB, MAN2B1, SELPLG	100	195	12983	3.32897	0.715259
INTERPRO	IPR006703:AIG1	2	0.170503	0.0453237	GIMAP4, GIMAP5	111	7	16659	42.8803	0.717758
INTERPRO	IPR010926:Myosin tail 2	2	0.170503	0.0516301	MYO1E, MYO1F	111	8	16659	37.5203	0.734268
GOTERM_MF_FAT	GO:0050431~transforming growth factor beta binding	2	0.170503	0.0737142	TGFBR2, TGFB3	100	10	12983	25.966	0.735194
GOTERM_MF_FAT	GO:0042277~peptide binding	5	0.426257	0.0695627	TPP1, FPR1, BDKRB2, CTSB, SSR3	100	203	12983	3.19778	0.735352
INTERPRO	IPR007110:Immunoglobulin-like	9	0.767263	0.0179288	F11R, IGFBP7, AXL, HLA-DPA1, FCGR2A, HLA-E, BTN3A3, CSF1R, HLA-F	111	501	16659	2.69607	0.742532
UP_SEQ_FEATURE	domain:IQ	3	0.255754	0.0476539	MYO1E, MYO1F, MYH9	114	59	19113	8.52498	0.748259
UP_SEQ_FEATURE	region of interest:Alpha-3	2	0.170503	0.0519793	HLA-E, HLA-F	114	9	19113	37.2573	0.758105
INTERPRO	IPR011161:MHC class I-like antigen recognition	3	0.255754	0.0146027	PROCR, HLA-E, HLA-F	111	28	16659	16.0801	0.770313
GOTERM_MF_FAT	GO:0005516~calmodulin binding	4	0.341006	0.0914343	MYO1E, MYO1F, MYH9, IQGAP1	100	140	12983	3.70943	0.792267
BIOCARTA	h_granulocytesPathway:Adhesion and Diapedesis of Granulocytes	3	0.255754	0.0215837	ITGB2, SELPLG, ITGAM	22	16	1437	12.2472	0.796658
INTERPRO	IPR003597:Immunoglobulin C1-set	3	0.255754	0.0743014	HLA-DPA1, HLA-E, HLA-F	111	68	16659	6.62122	0.831646
INTERPRO	IPR013513:Integrin alpha chain, C-terminal, cytoplasmic region	2	0.170503	0.0825482	ITGA5, ITGAM	111	13	16659	23.0894	0.842162
INTERPRO	IPR000668:Peptidase C1A, papain C-terminal	2	0.170503	0.0886109	CTSZ, CTSB	111	14	16659	21.4402	0.843658
INTERPRO	IPR013128:Peptidase C1A, papain	2	0.170503	0.0886109	CTSZ, CTSB	111	14	16659	21.4402	0.843658
INTERPRO	IPR001781:Zinc finger, LIM-type	4	0.341006	0.0124668	LIMS1, LIMK2, TRIP6, TES	111	73	16659	8.22362	0.84768
UP_SEQ_FEATURE	domain:Thyroglobulin type-1	2	0.170503	0.074213	CD74, IGFBP5	114	13	19113	25.7935	0.85577
UP_SEQ_FEATURE	domain:SH3	4	0.341006	0.0876381	OSTF1, MYO1E, MYO1F, SLA	114	177	19113	3.78888	0.861118
UP_SEQ_FEATURE	glycosylation site:O-linked (Xyl...) (glycosaminoglycan)	2	0.170503	0.0796901	CD164, CD74	114	14	19113	23.9511	0.861321
UP_SEQ_FEATURE	short sequence motif:GFFKR motif	2	0.170503	0.0851352	ITGA5, ITGAM	114	15	19113	22.3544	0.866135
UP_SEQ_FEATURE	binding site:Substrate	5	0.426257	0.0996256	SAT1, UAP1, UGDH, C9ORF95, FAH	114	297	19113	2.82252	0.884228
PIR_SUPERFAMILY	PIRSF001990:class I histocompatibility antigen	2	0.170503	0.0730034	HLA-E, HLA-F	63	9	7396	26.0882	0.949929
INTERPRO	IPR013783:Immunoglobulin-like fold	10	0.852515	0.0109705	F11R, LAIR1, AXL, HLA-DPA1, FCGR2A, HLA-E, BTN3A3, FLNB, CSF1R, HLA-F	111	553	16659	2.71394	0.96346
PIR_SUPERFAMILY	PIRSF006350:monocarbosylate transporter MCT2	2	0.170503	0.0572477	SLC16A3, SLC16A7	63	7	7396	33.542	0.990507
